# Supplementary material for: A dynamic bactofilin cytoskeleton cooperates with an M23 endopeptidase to control bacterial morphogenesis
Source: eLife. 2024 Jan 31;12:RP86577. doi: 10.7554/eLife.86577 (PMC10945521; doi:10.7554/eLife.86577)
Supplement: Figure 7—source data 1. — The dataset includes the genome accession numbers and species, the accession numbers of the predicted bactofilin and M23 peptidase homologs as well as the genomic coordinates and orientations of the respective genes. [file elife-86577-fig7-data1.xlsx]

## Sheet: bacA-M23 peptidase clusters
Assembly accession	Species	Annotation 1	Protein_ID 1	Start 1	End 1	Strand 1		Annotation 2	Protein_ID 2	Start 2	End 2	Strand 2
GCF_000981585.1	Paenibacillus riograndensis SBR5	Bactofilin	WP_020429448.1	1411017	1411457	-		M23 Peptidase	WP_020429447.1	1411494	1412690	-
GCF_000024685.1	Paenibacillus sp. Y412MC10	M23 Peptidase	WP_015737306.1	5994017	5994988	+		Bactofilin	WP_015737307.1	5995024	5995443	+
GCF_000758725.1	Paenibacillus odorifer	Bactofilin	WP_038568928.1	1126115	1126564	-		M23 Peptidase	WP_052096797.1	1126602	1127891	-
GCF_000235605.1	Desulfosporosinus orientis DSM 765	M23 Peptidase	WP_014186780.1	4759086	4759994	+		Bactofilin	WP_014186781.1	4759987	4760418	+
GCF_000010045.1	Desulfitobacterium hafniense Y51	M23 Peptidase	WP_011460965.1	3691819	3692745	+		Bactofilin	WP_011460966.1	3692750	3693313	+
GCF_000019145.1	Caulobacter sp. K31	Bactofilin	WP_012286608.1	2802026	2802502	-		M23 Peptidase	WP_012286609.1	2802483	2803637	-
GCF_000235585.1	Paenibacillus terrae HPL-003	Bactofilin	WP_014280284.1	3027812	3028273	-		M23 Peptidase	WP_043922398.1	3028293	3029324	-
GCF_000940995.1	Photobacterium gaetbulicola Gung47	M23 Peptidase	WP_044623107.1	1833588	1834541	+		Bactofilin	WP_044623108.1	1834550	1834906	+
GCF_000222485.1	Cyclobacterium marinum DSM 745	Bactofilin	WP_014019210.1	1334963	1335382	-		M23 Peptidase	WP_014019211.1	1335385	1336254	-
GCF_000949425.1	Paenibacillus sp. IHBB 10380	M23 Peptidase	WP_044878461.1	3952145	3953134	+		Bactofilin	WP_044878462.1	3953163	3953585	+
GCF_001272655.1	Paenibacillus peoriae	Bactofilin	WP_053324862.1	1442453	1442914	-		M23 Peptidase	WP_053324863.1	1442960	1443991	-
GCF_000155735.2	Octadecabacter arcticus 238	Bactofilin	WP_015494543.1	1197851	1198369	-		M23 Peptidase	WP_051076408.1	1198359	1199654	-
GCF_000767465.1	Novosphingobium pentaromativorans US6-1	M23 Peptidase	WP_007012646.1	2376806	2377942	+		Bactofilin	WP_007012645.1	2377944	2378354	+
GCF_000017705.1	Vibrio campbellii ATCC BAA-1116	Bactofilin	WP_048814467.1	67842	68096	-		M23 Peptidase	WP_011999118.1	68189	69142	-
GCF_000203895.1	Paracoccus denitrificans PD1222	M23 Peptidase	WP_041530486.1	1687993	1689282	+		Bactofilin	WP_011750699.1	1689272	1689769	+
GCF_001046955.1	Marinovum algicola DG 898	Bactofilin	WP_048531192.1	1450275	1450787	-		M23 Peptidase	WP_048531194.1	1450777	1452090	-
GCF_001050135.1	Cyclobacterium amurskyense	Bactofilin	WP_048640938.1	1287640	1288059	-		M23 Peptidase	WP_048640939.1	1288062	1288931	-
GCF_001482385.1	Pseudoalteromonas rubra	Bactofilin	WP_058797676.1	4241031	4241405	-		M23 Peptidase	WP_058797677.1	4241395	4242501	-
GCF_000803645.1	Sphingopyxis fribergensis	Bactofilin	WP_039570382.1	27067	27444	-		M23 Peptidase	WP_052207662.1	27446	28702	-
GCF_000253255.1	Novosphingobium sp. PP1Y	Bactofilin	WP_013831498.1	37912	38322	-		M23 Peptidase	WP_013831499.1	38324	39472	-
GCF_000725345.1	Pelosinus sp. UFO1	M23 Peptidase	WP_038674350.1	4773716	4774642	+		Bactofilin	WP_038674352.1	4774705	4775094	+
GCF_000271665.2	Pelosinus fermentans JBW45	Bactofilin	WP_007954710.1	5361475	5361873	-		M23 Peptidase	WP_007954709.1	5361936	5362859	-
GCF_001307295.1	Sphingopyxis macrogoltabida	Bactofilin	WP_054586381.1	30971	31369	-		M23 Peptidase	WP_054586382.1	31371	32573	-
GCF_000146875.3	Paenibacillus polymyxa E681	Bactofilin	WP_013309185.1	1257180	1257641	-		M23 Peptidase	WP_013309186.1	1257687	1258718	-
GCF_000819565.1	Celeribacter indicus	Bactofilin	WP_043869224.1	1608961	1609473	-		M23 Peptidase	WP_043869225.1	1609463	1610767	-
GCF_000016985.1	Alkaliphilus metalliredigens QYMF	M23 Peptidase	WP_012064257.1	3195490	3196413	+		Bactofilin	WP_012064258.1	3196449	3196829	+
GCF_000017285.1	Marinomonas sp. MWYL1	Bactofilin	WP_012069593.1	2144812	2145276	-		M23 Peptidase	WP_012069594.1	2145186	2146130	-
GCF_000354175.2	Vibrio alginolyticus NBRC 15630 = ATCC 17749	M23 Peptidase	WP_005374721.1	337187	338140	+		Bactofilin	WP_049812047.1	338179	338496	+
GCF_000325705.1	Echinicola vietnamensis DSM 17526	Bactofilin	WP_041738280.1	688811	689257	-		M23 Peptidase	WP_015264460.1	689263	690141	-
GCF_000024825.1	Vibrio antiquarius	Bactofilin	WP_005395593.1	1223416	1223646	-		M23 Peptidase	WP_005395595.1	1223772	1224725	-
GCF_000009985.1	Magnetospirillum magneticum AMB-1	M23 Peptidase	WP_011386221.1	4274514	4275794	+		Bactofilin	WP_011386222.1	4275808	4276269	+
GCF_000284255.1	Rubrivivax gelatinosus IL144	Bactofilin	WP_014429755.1	3804935	3805384	-		M23 Peptidase	WP_014429756.1	3805371	3806420	-
GCF_000155675.2	Octadecabacter antarcticus 307	M23 Peptidase	WP_015500432.1	2871112	2872407	+		Bactofilin	WP_015500433.1	2872397	2872915	+
GCF_000154785.2	Roseobacter litoralis Och 149	Bactofilin	WP_013961361.1	1461263	1461757	-		M23 Peptidase	WP_013961362.1	1461747	1463081	-
GCF_000444995.1	Paracoccus aminophilus JCM 7686	Bactofilin	WP_020949450.1	657623	658117	-		M23 Peptidase	WP_051201508.1	658107	659405	-
GCF_000184325.1	Vibrio furnissii NCTC 11218	Bactofilin	WP_014257790.1	908773	909078	-		M23 Peptidase	WP_004727488.1	909087	910034	-
GCF_000231385.2	Desulfosporosinus meridiei DSM 13257	M23 Peptidase	WP_014904373.1	3778897	3779805	+		Bactofilin	WP_014904374.1	3779810	3780247	+
GCF_000300235.2	Thalassospira xiamenensis M-5 = DSM 17429	Bactofilin	WP_007089477.1	2198787	2199245	-		M23 Peptidase	WP_007089476.1	2199205	2200551	-
GCF_001278035.1	Sphingopyxis sp. 113P3	Bactofilin	WP_053552473.1	24303	24794	-		M23 Peptidase	WP_053552474.1	24712	25929	-
GCF_000011965.2	Ruegeria pomeroyi DSS-3	M23 Peptidase	WP_044028323.1	2373646	2374974	+		Bactofilin	WP_011047953.1	2374964	2375479	+
GCF_000788395.1	Pseudoalteromonas sp. OCN003	Bactofilin	WP_038640707.1	1758258	1758644	-		M23 Peptidase	WP_052140941.1	1758634	1759881	-
GCF_000143985.1	Spirochaeta smaragdinae DSM 11293	Bactofilin	WP_013255746.1	3410900	3411373	-		M23 Peptidase	WP_013255747.1	3411407	3412429	-
GCF_000511355.1	Leisingera methylohalidivorans DSM 14336	M23 Peptidase	WP_024090095.1	1778768	1780117	+		Bactofilin	WP_024090096.1	1780107	1780649	+
GCF_001444405.1	Pseudoalteromonas phenolica	Bactofilin	WP_058029259.1	1150863	1151249	-		M23 Peptidase	WP_058029260.1	1151239	1152300	-
GCF_000177235.2	Bacillus cellulosilyticus DSM 2522	M23 Peptidase	WP_013488653.1	2251802	2252728	+		Bactofilin	WP_013488654.1	2252771	2253178	+
GCF_000177235.2	Bacillus cellulosilyticus DSM 2522	Bactofilin	WP_049786639.1	2552106	2552585	-		M23 Peptidase	WP_013488956.1	2552625	2553581	-
GCF_000017265.1	Phenylobacterium zucineum HLK1	M23 Peptidase	WP_012522390.1	2057325	2058479	+		Bactofilin	WP_049758200.1	2058526	2058876	+
GCF_000024405.1	Sebaldella termitidis ATCC 33386	M23 Peptidase	WP_012861569.1	2249939	2250727	+		Bactofilin	WP_012861570.1	2250697	2251092	+
GCF_000266885.1	Turneriella parva DSM 21527	Bactofilin	WP_014801613.1	440463	440870	+		M23 Peptidase	WP_014801614.1	440950	442194	+
GCF_000266885.1	Turneriella parva DSM 21527	Bactofilin	WP_014804959.1	4015111	4015467	-		M23 Peptidase	WP_014804960.1	4015485	4016594	-
GCF_000092285.1	Caulobacter segnis ATCC 21756	M23 Peptidase	WP_013079279.1	2365147	2366298	+		Bactofilin	WP_013079280.1	2366279	2366764	+
GCF_000015985.1	Rhodobacter sphaeroides ATCC 17029	M23 Peptidase	WP_011337885.1	1707901	1709244	+		Bactofilin	WP_011337886.1	1709234	1709752	+
GCF_000147835.2	Sphingobium chlorophenolicum L-1	M23 Peptidase	WP_013847769.1	1945332	1946510	+		Bactofilin	WP_049785895.1	1946449	1946877	+
GCF_000310105.2	Pseudoalteromonas sp. Bsw20308	Bactofilin	WP_007376892.1	1240824	1241306	-		M23 Peptidase	WP_007376893.1	1241296	1242459	-
GCF_000243155.2	Desulfitobacterium dehalogenans ATCC 51507	M23 Peptidase	WP_014795556.1	3836101	3837027	+		Bactofilin	WP_014795557.1	3837032	3837601	+
GCF_000018145.1	Dinoroseobacter shibae DFL 12 = DSM 16493	Bactofilin	WP_012177847.1	1207399	1207956	-		M23 Peptidase	WP_012177848.1	1207946	1209274	-
GCF_000014045.1	Roseobacter denitrificans OCh 114	M23 Peptidase	WP_011569137.1	2881528	2882862	+		Bactofilin	WP_011569138.1	2882852	2883346	+
GCF_000283515.1	Sphingobium sp. SYK-6	Bactofilin	WP_041392245.1	4117168	4117587	-		M23 Peptidase	WP_041392246.1	4117526	4118608	-
GCF_001305615.1	Confluentimicrobium sp. EMB200-NS6	M23 Peptidase	WP_054540408.1	2241879	2243132	+		Bactofilin	WP_054539171.1	2243122	2243610	+
GCF_000013325.1	Novosphingobium aromaticivorans DSM 12444	M23 Peptidase	WP_011443724.1	62365	63528	+		Bactofilin	WP_011443725.1	63536	63886	+
GCF_000237085.1	[Clostridium] clariflavum DSM 19732	M23 Peptidase	WP_014256766.1	4432479	4433402	+		Bactofilin	WP_014256767.1	4433420	4433839	+
GCF_000154765.2	Phaeobacter inhibens DSM 17395	M23 Peptidase	WP_014874843.1	1829791	1831122	+		Bactofilin	WP_014880138.1	1831112	1831654	+
GCF_000013085.1	Rhodospirillum rubrum ATCC 11170	Bactofilin	YP_426954.1	2164886	2165365	-		M23 Peptidase	YP_426955.1	2165349	2166731	-
GCF_000014065.1	Ruegeria sp. TM1040	Bactofilin	WP_011538428.1	1163480	1164001	-		M23 Peptidase	WP_011538429.1	1163991	1165322	-
GCF_000190735.1	Pseudopedobacter saltans DSM 12145	Bactofilin	WP_013633544.1	2945203	2945622	-		M23 Peptidase	WP_013633545.1	2945633	2946502	-
GCF_000007685.1	Leptospira interrogans serovar Copenhageni str. Fiocruz L1-130	Bactofilin	WP_000974282.1	3172266	3172676	+		M23 Peptidase	WP_000576385.1	3172732	3173850	+
GCF_000007685.1	Leptospira interrogans serovar Copenhageni str. Fiocruz L1-130	M23 Peptidase	WP_000351651.1	4258056	4259075	+		Bactofilin	WP_000246073.1	4259075	4259422	+
GCF_000145035.1	Butyrivibrio proteoclasticus B316	M23 Peptidase	WP_013281834.1	2989245	2990027	+		Bactofilin	WP_013281835.1	2990043	2990522	+
GCF_000183425.1	Marivirga tractuosa DSM 4126	M23 Peptidase	WP_013454684.1	3026410	3027279	+		Bactofilin	WP_013454685.1	3027303	3027743	+
GCF_000017605.1	Leptospira biflexa serovar Patoc strain ''Patoc 1 (Ames)''	M23 Peptidase	WP_012388417.1	1499126	1500250	-		Bactofilin	WP_012388418.1	1500270	1500674	-
GCF_000017605.1	Leptospira biflexa serovar Patoc strain ''Patoc 1 (Ames)''	M23 Peptidase	WP_012390384.1	3596739	3597728	+		Bactofilin	WP_012390385.1	3597728	3598081	+
GCF_000022265.1	Geobacter daltonii FRC-32	M23 Peptidase	WP_049764387.1	3492505	3493371	+		Bactofilin	WP_012648244.1	3493411	3493782	+
GCF_000006905.1	Caulobacter crescentus CB15	M23 Peptidase	NP_420679.1	2064387	2065538	+		Bactofilin	NP_420680.1	2065519	2066004	+
GCF_000227705.2	Thermobacillus composti KWC4	Bactofilin	WP_015253785.1	856155	856646	-		M23 Peptidase	WP_015253786.1	856646	857674	-
GCF_000227705.2	Thermobacillus composti KWC4	M23 Peptidase	WP_015255821.1	3161658	3162659	+		Bactofilin	WP_052835920.1	3162847	3163110	+
GCF_000786425.1	Vibrio anguillarum	Bactofilin	WP_010319262.1	23425	23691	-		M23 Peptidase	WP_017044959.1	23730	24677	-
GCF_000175215.2	Asticcacaulis excentricus CB 48	Bactofilin	WP_049781756.1	420704	421198	-		M23 Peptidase	WP_013480216.1	421269	422408	-
GCF_000015285.1	Psychromonas ingrahamii 37	M23 Peptidase	WP_011769912.1	1893078	1894088	+		Bactofilin	WP_011769913.1	1893992	1894465	+
GCF_000313175.2	Leptospira santarosai serovar Shermani str. LT 821	M23 Peptidase	WP_004465452.1	3375461	3376579	-		Bactofilin	WP_004460550.1	3376631	3377041	-
GCF_000313175.2	Leptospira santarosai serovar Shermani str. LT 821	M23 Peptidase	WP_004467196.1	3637052	3638071	+		Bactofilin	WP_004462631.1	3638072	3638416	+
GCF_000265405.1	Belliella baltica DSM 15883	Bactofilin	WP_041779211.1	697034	697459	-		M23 Peptidase	WP_014771325.1	697462	698334	-
GCF_000968135.1	Magnetospira sp. QH-2	M23 Peptidase	WP_052716222.1	1581155	1582468	+		Bactofilin	WP_052716223.1	1582482	1582991	+
GCF_000014865.1	Magnetococcus marinus MC-1	Bactofilin	WP_049757658.1	2432858	2433226	-		M23 Peptidase	WP_011713607.1	2433259	2434140	-
GCF_001028705.1	Croceicoccus naphthovorans	M23 Peptidase	WP_053059298.1	3294995	3296140	+		Bactofilin	WP_053059227.1	3296088	3296519	+
GCF_001465295.1	Pseudoalteromonas translucida KMM 520	M23 Peptidase	WP_058373866.1	2488081	2489244	+		Bactofilin	WP_058373867.1	2489234	2489716	+
GCF_001455325.1	Pseudoalteromonas issachenkonii	Bactofilin	WP_013464451.1	1036679	1037161	-		M23 Peptidase	WP_016899427.1	1037151	1038314	-
GCF_000017565.1	Parvibaculum lavamentivorans DS-1	M23 Peptidase	WP_012112205.1	3497284	3498663	+		Bactofilin	WP_012112206.1	3498641	3499234	+
GCF_000006745.1	Vibrio cholerae O1 biovar El Tor str. N16961	Bactofilin	NP_233424.1	993043	993444	-		M23 Peptidase	NP_233425.1	993354	994298	-
GCF_000341395.1	Desulfocapsa sulfexigens DSM 10523	M23 Peptidase	WP_015402726.1	535004	536002	+		Bactofilin	WP_015402727.1	536004	536426	+
GCF_000214215.1	Marinomonas posidonica IVIA-Po-181	M23 Peptidase	WP_013796654.1	2340183	2341133	+		Bactofilin	WP_049782762.1	2341124	2341459	+
GCF_000013025.1	Hyphomonas neptunium ATCC 15444	M23 Peptidase	WP_011647614.1	2788610	2789827	+		Bactofilin	WP_011647615.1	2789811	2790353	+
GCF_000214375.1	Treponema primitia ZAS-2	Bactofilin	WP_015707247.1	1159281	1159739	-		M23 Peptidase	WP_015707248.1	1159770	1160810	-
GCF_000026085.1	Pseudoalteromonas haloplanktis TAC125	M23 Peptidase	WP_011328827.1	2307076	2308239	+		Bactofilin	WP_011328828.1	2308229	2308711	+
GCF_000013945.1	Leptospira borgpetersenii serovar Hardjo-bovis str. L550	M23 Peptidase	WP_011671054.1	3313845	3314963	-		Bactofilin	WP_011671055.1	3315015	3315425	-
GCF_000013945.1	Leptospira borgpetersenii serovar Hardjo-bovis str. L550	M23 Peptidase	WP_011671193.1	3546743	3547762	+		Bactofilin	WP_002728037.1	3547763	3548110	+
GCF_000092125.1	Meiothermus silvanus DSM 9946	M23 Peptidase	WP_049777750.1	195477	196400	+		Bactofilin	WP_013156742.1	196446	196817	+
GCF_000092125.1	Meiothermus silvanus DSM 9946	Bactofilin	WP_013156742.1	196446	196817	+		M23 Peptidase	WP_013156743.1	196967	197905	+
GCF_000214355.1	Treponema azotonutricium ZAS-9	M23 Peptidase	WP_015710154.1	476643	477686	+		Bactofilin	WP_015710155.1	477694	478140	+
GCF_001310255.1	Brevundimonas sp. DS20	Bactofilin	WP_054765610.1	2132645	2133193	-		M23 Peptidase	WP_054765611.1	2133177	2134322	-
GCF_000243135.2	Desulfitobacterium dichloroeliminans LMG P-21439	M23 Peptidase	WP_015263509.1	3196382	3197308	+		Bactofilin	WP_015263510.1	3197313	3197903	+
GCF_000144605.1	Brevundimonas subvibrioides ATCC 15264	M23 Peptidase	WP_013269599.1	2187643	2188788	+		Bactofilin	WP_013269600.1	2188778	2189350	+
GCF_001187845.1	Octadecabacter temperatus	M23 Peptidase	WP_049834574.1	1690809	1692128	+		Bactofilin	WP_049834575.1	1692118	1692618	+
GCF_000023785.1	Hirschia baltica ATCC 49814	M23 Peptidase	WP_015827599.1	1887274	1888509	+		Bactofilin	WP_015827600.1	1888493	1888972	+
GCF_000568815.1	Sulfurospirillum multivorans DSM 12446	Bactofilin	WP_025345355.1	2165686	2166078	-		M23 Peptidase	WP_025345356.1	2166018	2166917	-
GCF_000015865.1	Ruminiclostridium thermocellum ATCC 27405	M23 Peptidase	WP_003515939.1	2077401	2078330	+		Bactofilin	WP_003515936.1	2078367	2078804	+
GCF_000013985.1	Sphingopyxis alaskensis RB2256	Bactofilin	WP_041382863.1	18852	19319	-		M23 Peptidase	WP_011540366.1	19249	20457	-
GCF_000025945.1	Desulfotalea psychrophila LSv54	Bactofilin	WP_011188241.1	1129433	1129834	-		M23 Peptidase	WP_011188242.1	1129824	1130789	-
GCF_001010805.1	Spongiibacter sp. IMCC21906	M23 Peptidase	WP_047011294.1	1141090	1142046	+		Bactofilin	WP_052763379.1	1142073	1142417	+
GCF_001008165.2	Altererythrobacter atlanticus	Bactofilin	WP_046903941.1	2429823	2430227	-		M23 Peptidase	WP_046903942.1	2430220	2431377	-
GCF_000092245.1	Arcobacter nitrofigilis DSM 7299	M23 Peptidase	WP_013134470.1	641645	642559	+		Bactofilin	WP_013134471.1	642505	642963	+
GCF_000190635.1	Syntrophobotulus glycolicus DSM 8271	M23 Peptidase	WP_013625125.1	1974004	1974918	+		Bactofilin	WP_013625126.1	1974921	1975373	+
GCF_000009905.1	Symbiobacterium thermophilum IAM 14863	Bactofilin	WP_043714426.1	3551523	3551930	-		M23 Peptidase	WP_011197438.1	3551933	3552982	-
GCF_000092605.1	Thiomonas intermedia K12	Bactofilin	WP_013123050.1	1493876	1494373	-		M23 Peptidase	WP_013123051.1	1494383	1495351	-
GCF_000258405.1	Ignavibacterium album JCM 16511	M23 Peptidase	WP_050951001.1	860406	861287	+		Bactofilin	WP_014559633.1	861298	861669	+
GCF_000590925.1	Roseibacterium elongatum DSM 19469	Bactofilin	WP_025312642.1	2487356	2487937	-		M23 Peptidase	WP_025312643.1	2487927	2489267	-
GCF_000738435.1	Planktomarina temperata RCA23	Bactofilin	WP_044049775.1	1558798	1559286	-		M23 Peptidase	WP_044051383.1	1559276	1560529	-
GCF_000024665.1	Fibrobacter succinogenes subsp. succinogenes S85	Bactofilin	WP_014546133.1	1754733	1755110	-		M23 Peptidase	WP_014546134.1	1755140	1755940	-
GCF_000014745.1	Maricaulis maris MCS10	Bactofilin	WP_011643242.1	1421791	1422345	-		M23 Peptidase	WP_011643243.1	1422329	1423570	-
GCF_000164885.1	Ketogulonicigenium vulgare Y25	Bactofilin	WP_013383229.1	377824	378324	-		M23 Peptidase	WP_014537851.1	378314	379633	-
GCF_001187785.1	Wenzhouxiangella marina	M23 Peptidase	WP_049725590.1	1968130	1969086	+		Bactofilin	WP_049725591.1	1968987	1969445	+
GCF_000024425.1	Meiothermus ruber DSM 1279	M23 Peptidase	WP_013014448.1	2249594	2250496	+		Bactofilin	WP_013014449.1	2250534	2250929	+
GCF_000024425.1	Meiothermus ruber DSM 1279	Bactofilin	WP_013014449.1	2250534	2250929	+		M23 Peptidase	WP_013014450.1	2251011	2251961	+
GCF_000018325.1	Alkaliphilus oremlandii OhILAs	Bactofilin	WP_012158062.1	211938	212342	-		M23 Peptidase	WP_012158063.1	212378	213334	-
GCF_000242915.1	Sulfurimonas gotlandica GD1	Bactofilin	WP_008337741.1	669395	669706	-		M23 Peptidase	WP_008337743.1	669703	670659	-
GCF_000279145.1	Melioribacter roseus P3M-2	Bactofilin	WP_014854960.1	315048	315416	-		M23 Peptidase	WP_014854961.1	315425	316270	-
GCF_000305815.1	Dehalobacter sp. CF	Bactofilin	WP_015042454.1	461165	461581	-		M23 Peptidase	WP_015042455.1	461598	462491	-
GCF_000013005.1	Erythrobacter litoralis HTCC2594	Bactofilin	WP_011415557.1	2662216	2662638	-		M23 Peptidase	WP_011415558.1	2662631	2663764	-
GCF_000020005.1	Natranaerobius thermophilus JW/NM-WN-LF	Bactofilin	WP_012449301.1	3154474	3154851	-		M23 Peptidase	WP_012449302.1	3154874	3155818	-
GCF_000008185.1	Treponema denticola ATCC 35405	M23 Peptidase	NP_970727.1	130721	131752	+		Bactofilin	NP_970728.1	131755	132174	+
GCF_000219725.1	Treponema caldarium DSM 7334	M23 Peptidase	WP_013967525.1	42463	43503	+		Bactofilin	WP_013967526.1	43516	43920	+
GCF_000024845.1	Rhodothermus marinus DSM 4252	M23 Peptidase	WP_012842824.1	334554	335450	+		Bactofilin	WP_012842825.1	335492	335950	+
GCF_001077815.1	Erythrobacter sp. s21-N3	Bactofilin	WP_053106673.1	466032	466430	-		M23 Peptidase	WP_053106499.1	466423	467622	-
GCF_000020525.1	Chloroherpeton thalassium ATCC 35110	M23 Peptidase	WP_012499921.1	1608821	1609639	+		Bactofilin	WP_012499922.1	1609650	1610099	+
GCF_000305935.1	Thermacetogenium phaeum DSM 12270	M23 Peptidase	WP_015049209.1	35281	36216	+		Bactofilin	WP_015049210.1	36718	37146	+
GCF_000013045.1	Salinibacter ruber DSM 13855	M23 Peptidase	YP_445042.1	1166105	1166887	+		Bactofilin	YP_445043.1	1166938	1167438	+
GCF_000014785.1	Alkalilimnicola ehrlichii MLHE-1	Bactofilin	WP_011628364.1	665129	665506	-		M23 Peptidase	WP_011628365.1	665515	666474	-
GCF_000195275.1	Treponema succinifaciens DSM 2489	Bactofilin	WP_013702420.1	2459767	2460183	-		M23 Peptidase	WP_013702421.1	2460185	2461198	-
GCF_000512895.1	Dehalobacter restrictus DSM 9455	Bactofilin	WP_019225776.1	1251116	1251532	-		M23 Peptidase	WP_019225777.1	1251551	1252444	-
GCF_001028625.1	Altererythrobacter marensis	M23 Peptidase	WP_047807114.1	2348317	2349447	+		Bactofilin	WP_047807115.1	2349440	2349859	+
GCF_000177635.2	Desulfurispirillum indicum S5	Bactofilin	WP_013505027.1	409104	409529	-		M23 Peptidase	WP_013505028.1	409472	410614	-
GCF_000213235.1	Tepidanaerobacter acetatoxydans Re1	Bactofilin	WP_013779643.1	2745555	2745977	-		M23 Peptidase	WP_013779644.1	2745993	2746904	-
GCF_000152825.2	Parvularcula bermudensis HTCC2503	M23 Peptidase	WP_013299264.1	114360	115709	+		Bactofilin	WP_013299265.1	115693	116364	+
GCF_000145615.1	Thermoanaerobacterium thermosaccharolyticum DSM 571	Bactofilin	WP_013297566.1	1104664	1105071	-		M23 Peptidase	WP_013297567.1	1105112	1106047	-
GCF_000019165.1	Heliobacterium modesticaldum Ice1	Bactofilin	WP_012282167.1	1074504	1074914	-		M23 Peptidase	WP_049754044.1	1075005	1076039	-
GCF_000092205.1	Desulfurivibrio alkaliphilus AHT 2	M23 Peptidase	WP_013162334.1	106702	107604	+		Bactofilin	WP_013162335.1	107614	108159	+
GCF_000212415.1	Treponema brennaborense DSM 12168	M23 Peptidase	WP_013759451.1	2758007	2759029	+		Bactofilin	WP_013759452.1	2759040	2759480	+
GCF_000014725.1	Syntrophomonas wolfei subsp. wolfei str. Goettingen G311	Bactofilin	WP_011641931.1	2923918	2924313	-		M23 Peptidase	WP_011641932.1	2924358	2925272	-
GCF_000331995.1	[Clostridium] stercorarium subsp. stercorarium DSM 8532	M23 Peptidase	WP_015359651.1	2178016	2178963	+		Bactofilin	WP_015359652.1	2178986	2179408	+
GCF_000265295.1	Sulfurospirillum barnesii SES-3	Bactofilin	WP_014769845.1	1654729	1655121	-		M23 Peptidase	WP_014769846.1	1655061	1655960	-
GCF_000196455.1	[Clostridium] sticklandii	M23 Peptidase	WP_013361101.1	1017613	1018524	+		Bactofilin	WP_013361102.1	1018534	1018908	+
GCF_000447675.1	Treponema pedis str. T A4	M23 Peptidase	WP_020964589.1	868611	869642	+		Bactofilin	WP_020964590.1	869644	870063	+
GCF_000007085.1	Caldanaerobacter subterraneus subsp. tengcongensis MB4	Bactofilin	WP_011025230.1	849818	850207	-		M23 Peptidase	WP_011025231.1	850209	851114	-
GCF_000147695.2	Thermoanaerobacter wiegelii Rt8.B1	Bactofilin	WP_014062621.1	966361	966759	-		M23 Peptidase	WP_014062622.1	966761	967666	-
GCF_000024325.1	Desulfohalobium retbaense DSM 5692	M23 Peptidase	WP_015751705.1	1490674	1491699	+		Bactofilin	WP_015751706.1	1491874	1492350	+
GCF_001262075.1	Ottowia sp. oral taxon 894	M23 Peptidase	WP_050714946.1	1025328	1026314	+		Bactofilin	WP_050714947.1	1026402	1026824	+
GCF_000309885.1	Thermus oshimai JL-2	M23 Peptidase	WP_016328543.1	248817	249716	+		Bactofilin	WP_041436056.1	249727	250089	+
GCF_000020485.1	Halothermothrix orenii H 168	Bactofilin	WP_015924060.1	2565508	2565924	-		M23 Peptidase	WP_015924061.1	2565930	2566934	-
GCF_000187005.1	Thermus scotoductus SA-01	M23 Peptidase	WP_041437998.1	276578	277507	+		Bactofilin	WP_015716245.1	277518	277883	+
GCF_000775995.1	Treponema sp. OMZ 838	M23 Peptidase	WP_044013525.1	514218	515243	+		Bactofilin	WP_044013527.1	515246	515671	+
GCF_000148425.1	Thermoanaerobacter sp. X513	Bactofilin	WP_003866967.1	781458	781856	-		M23 Peptidase	WP_009052640.1	781858	782763	-
GCF_000015585.1	Halorhodospira halophila SL1	M23 Peptidase	WP_011814781.1	2199916	2200845	+		Bactofilin	WP_011814782.1	2200755	2201441	+
GCF_000189775.2	Thermoanaerobacterium xylanolyticum LX-11	M23 Peptidase	WP_013788406.1	1687935	1688849	+		Bactofilin	WP_013788407.1	1688887	1689294	+
GCF_000307165.1	Amphibacillus xylanus NBRC 15112	M23 Peptidase	WP_015010911.1	2323052	2323921	+		Bactofilin	WP_015010912.1	2323938	2324327	+
GCF_000092405.1	Syntrophothermus lipocalidus DSM 12680	Bactofilin	WP_013176509.1	2392787	2393176	-		M23 Peptidase	WP_013176510.1	2393180	2394100	-
GCF_000183745.1	Oceanithermus profundus DSM 14977	M23 Peptidase	WP_013457086.1	461461	462393	+		Bactofilin	WP_013457087.1	462404	462841	+
GCF_000755145.1	Treponema putidum	Bactofilin	WP_044977981.1	746687	747106	-		M23 Peptidase	WP_044977983.1	747109	748140	-
GCF_000024885.1	Sulfurospirillum deleyianum DSM 6946	Bactofilin	WP_012857380.1	1631074	1631466	-		M23 Peptidase	WP_012857381.1	1631406	1632305	-
GCF_000208405.1	Selenomonas sputigena ATCC 35185	M23 Peptidase	WP_006192657.1	26384	27310	+		Bactofilin	WP_006192658.1	27325	27825	+
GCF_000012605.1	Thiomicrospira crunogena XCL-2	M23 Peptidase	WP_011370221.1	871125	872075	+		Bactofilin	WP_011370222.1	871997	872497	+
GCF_000025645.1	Thermoanaerobacter italicus Ab9	Bactofilin	WP_012994872.1	855341	855739	-		M23 Peptidase	WP_012994873.1	855741	856646	-
GCF_000763575.1	Thermoanaerobacter kivui	Bactofilin	WP_049684858.1	827042	827440	-		M23 Peptidase	WP_049684859.1	827442	828416	-
GCF_000092965.1	Thermoanaerobacter mathranii subsp. mathranii str. A3	Bactofilin	WP_013150088.1	869385	869783	-		M23 Peptidase	WP_013150089.1	869785	870690	-
GCF_001190745.1	Campylobacter gracilis	M23 Peptidase	WP_005873146.1	1774988	1775905	+		Bactofilin	WP_005873147.1	1775857	1776273	+
GCF_001274535.1	Leptotrichia sp. oral taxon 212	Bactofilin	WP_053393132.1	1953791	1954192	-		M23 Peptidase	WP_053393133.1	1954156	1954854	-
GCF_000144645.1	Thermosediminibacter oceani DSM 16646	Bactofilin	WP_013276981.1	2263365	2263757	-		M23 Peptidase	WP_013276982.1	2263769	2264683	-
GCF_000147355.1	Sulfurimonas autotrophica DSM 16294	M23 Peptidase	WP_013326396.1	571829	572785	+		Bactofilin	WP_049765279.1	572770	573084	+
GCF_000147075.1	Spirochaeta thermophila DSM 6192	Bactofilin	WP_013314636.1	2037763	2038143	-		M23 Peptidase	WP_013314637.1	2038143	2039177	-
GCF_000236585.1	Thermus sp. CCB_US3_UF1	Bactofilin	WP_014516384.1	1997471	1997836	-		M23 Peptidase	WP_014516385.1	1997847	1998746	-
GCF_000195335.1	Marinithermus hydrothermalis DSM 14884	M23 Peptidase	WP_013703177.1	355517	356449	+		Bactofilin	WP_013703178.1	356460	356858	+
GCF_000008125.1	Thermus thermophilus HB27	Bactofilin	WP_041443571.1	1336659	1337021	-		M23 Peptidase	WP_011173793.1	1337032	1337931	-
GCF_000165465.1	Halanaerobium praevalens DSM 2228	M23 Peptidase	WP_014553982.1	2012500	2013486	+		Bactofilin	WP_014553983.1	2013487	2013918	+
GCF_000021565.1	Persephonella marina EX-H1	Bactofilin	WP_041530948.1	1885039	1885461	-		M23 Peptidase	WP_012676113.1	1885398	1886291	-
GCF_000020985.1	Thermodesulfovibrio yellowstonii DSM 11347	Bactofilin	YP_002247905.1	55914	56270	-		M23 Peptidase	YP_002247906.1	56270	57106	-
GCF_000227665.2	Thioalkalimicrobium aerophilum AL3	Bactofilin	WP_051418492.1	1298304	1298642	-		M23 Peptidase	WP_006459445.1	1298648	1299613	-
GCF_000284635.1	Helicobacter cinaedi PAGU611	Bactofilin	WP_002957440.1	1319636	1320058	-		M23 Peptidase	WP_002957439.1	1320016	1320915	-
GCF_000020965.1	Dictyoglomus thermophilum H-6-12	Bactofilin	WP_012548271.1	1703996	1704382	-		M23 Peptidase	WP_012547470.1	1704398	1705315	-
GCF_000212395.1	Thermodesulfobium narugense DSM 14796	M23 Peptidase	WP_013755596.1	230787	231731	+		Bactofilin	WP_013755597.1	231746	232099	+
GCF_000185805.1	Thermovibrio ammonificans HB-1	M23 Peptidase	WP_013537582.1	786674	787573	+		Bactofilin	WP_013537583.1	787548	787922	+
GCF_000736415.1	Campylobacter iguaniorum	M23 Peptidase	WP_051870987.1	799963	800799	+		Bactofilin	WP_038453955.1	800748	801167	+
GCF_000007905.1	Helicobacter hepaticus ATCC 51449	Bactofilin	WP_011115301.1	441536	441955	-		M23 Peptidase	WP_011115302.1	441913	442812	-
GCF_000021645.1	Dictyoglomus turgidum DSM 6724	Bactofilin	YP_002351994.1	43508	43894	-		M23 Peptidase	YP_002351995.1	43913	44830	-
GCF_000021725.1	Nautilia profundicola AmH	Bactofilin	WP_015902827.1	1438879	1439259	-		M23 Peptidase	WP_015902440.1	1439205	1440107	-
GCF_000259255.1	Helicobacter cetorum MIT 00-7128	Bactofilin	WP_014660272.1	99652	100062	-		M23 Peptidase	WP_014660273.1	99981	100916	-
GCF_000015085.1	Campylobacter fetus subsp. fetus 82-40	M23 Peptidase	WP_002849160.1	742211	743101	+		Bactofilin	WP_002849161.1	743050	743463	+
GCF_000816265.1	Campylobacter subantarcticus LMG 24374	Bactofilin	WP_039664232.1	1187118	1187522	-		M23 Peptidase	WP_039664233.1	1187450	1188358	-
GCF_000465235.1	Campylobacter coli CVM N29710	M23 Peptidase	WP_002777140.1	703887	704789	+		Bactofilin	WP_002791735.1	704726	705121	+
GCF_000816785.1	Campylobacter peloridis LMG 23910	Bactofilin	WP_044598987.1	1172830	1173234	-		M23 Peptidase	WP_049984594.1	1173162	1174073	-
GCF_000200595.1	Helicobacter felis ATCC 49179	Bactofilin	WP_041302724.1	453485	453877	-		M23 Peptidase	WP_013468933.1	453790	454728	-
GCF_000215975.1	Thermodesulfobacterium geofontis OPF15	Bactofilin	WP_013908975.1	149086	149478	-		M23 Peptidase	WP_013908976.1	149475	150281	-
GCF_000009085.1	Campylobacter jejuni subsp. jejuni NCTC 11168 = ATCC 700819	Bactofilin	YP_002344479.1	1018565	1018960	-		M23 Peptidase	YP_002344480.1	1018897	1019799	-
GCF_000019205.1	Campylobacter lari RM2100	Bactofilin	WP_012661745.1	995366	995770	-		M23 Peptidase	WP_012661746.1	995698	996606	-
GCF_000020145.1	Elusimicrobium minutum Pei191	M23 Peptidase	WP_012414356.1	190446	191342	+		Bactofilin	WP_012414357.1	191361	191729	+
GCF_000816245.1	Campylobacter sp. RM16704	Bactofilin	WP_039667182.1	994213	994617	-		M23 Peptidase	WP_052245010.1	994545	995456	-
GCF_000816345.1	Campylobacter volucris LMG 24379	Bactofilin	WP_039665746.1	972594	972998	-		M23 Peptidase	WP_052243178.1	972926	973837	-
GCF_000191045.1	Desulfurobacterium thermolithotrophum DSM 11699	M23 Peptidase	WP_013638329.1	744769	745641	+		Bactofilin	WP_013638330.1	745638	746027	+
GCF_000008685.2	Borrelia burgdorferi B31	Bactofilin	NP_212379.1	250657	251211	-		M23 Peptidase	NP_212380.1	251212	252237	-
GCF_000816185.1	Campylobacter insulaenigrae NCTC 12927	Bactofilin	WP_039650378.1	956222	956626	-		M23 Peptidase	WP_052251978.1	956554	957465	-
GCF_000284335.1	Caldisericum exile AZM16c01	Bactofilin	WP_014454030.1	1461857	1462258	-		M23 Peptidase	WP_050981363.1	1462271	1463257	-
GCF_000008525.1	Helicobacter pylori 26695	Bactofilin	NP_208333.1	1621612	1622022	-		M23 Peptidase	NP_208334.1	1621941	1622879	-
GCF_000091985.1	Helicobacter mustelae 12198	Bactofilin	WP_041913164.1	1133840	1134226	-		M23 Peptidase	WP_013023329.1	1134139	1135080	-
GCF_000019685.1	Borrelia duttonii Ly	Bactofilin	WP_012538011.1	264066	264617	-		M23 Peptidase	WP_012538012.1	264618	265643	-
GCF_000009305.1	Helicobacter acinonychis str. Sheeba	M23 Peptidase	WP_011577255.1	251007	251942	+		Bactofilin	WP_011577256.1	251861	252268	+
GCF_000222835.1	Borrelia afzelii PKo	Bactofilin	WP_004790373.1	249815	250369	-		M23 Peptidase	WP_011600914.1	250370	251395	-
GCF_000222305.1	Borreliella bissettii DN127	Bactofilin	WP_014023493.1	249232	249786	-		M23 Peptidase	WP_014023494.1	249787	250812	-
GCF_000020565.1	Candidatus Amoebophilus asiaticus 5a2	M23 Peptidase	WP_012472847.1	879686	880579	+		Bactofilin	WP_012472848.1	880622	881107	+
GCF_001027545.1	Endomicrobium proavitum	Bactofilin	WP_052570818.1	1072474	1072851	-		M23 Peptidase	WP_052570819.1	1072865	1073818	-
GCF_000170955.2	Borreliella valaisiana VS116	Bactofilin	WP_006068703.1	250933	251487	-		M23 Peptidase	WP_006068998.1	251488	252513	-
GCF_000019705.1	Borrelia recurrentis A1	Bactofilin	WP_012538764.1	265011	265562	-		M23 Peptidase	WP_012538765.1	265563	266588	-
GCF_000512145.1	Borrelia parkeri HR1	Bactofilin	WP_025375280.1	251738	252280	-		M23 Peptidase	WP_025375281.1	252281	253306	-
GCF_000196215.1	Borreliella bavariensis PBi	Bactofilin	WP_011193585.1	249452	250006	-		M23 Peptidase	WP_011193586.1	250007	251032	-
GCF_000239475.1	Borrelia garinii BgVir	Bactofilin	WP_014653480.1	249554	250108	-		M23 Peptidase	WP_014653481.1	250109	251134	-
GCF_000008605.1	Treponema pallidum subsp. pallidum str. Nichols	Bactofilin	WP_010881497.1	57045	57476	-		M23 Peptidase	WP_010881498.1	57498	58526	-
GCF_000012085.1	Borrelia turicatae 91E135	Bactofilin	WP_011772201.1	251851	252393	-		M23 Peptidase	WP_041178433.1	252394	253419	-
GCF_000956315.1	Borrelia hermsii CC1	Bactofilin	WP_012422018.1	252517	253068	-		M23 Peptidase	WP_043924410.1	253069	254094	-
GCF_000445425.4	Borrelia miyamotoi LB-2001	Bactofilin	WP_020954634.1	251640	252200	-		M23 Peptidase	WP_020954635.1	252201	253226	-
