# Supplementary material for: A dynamic bactofilin cytoskeleton cooperates with an M23 endopeptidase to control bacterial morphogenesis
Source: eLife. 2024 Jan 31;12:RP86577. doi: 10.7554/eLife.86577 (PMC10945521; doi:10.7554/eLife.86577)
Supplement: Source data 1. [file elife-86577-data1.xlsx]

## Sheet: Fig. 1F
	Condition /Replicate	t1 [h]	ODt1	t2 [h]	ODt2	Growth rate (µ) [h-1]	Doubling time (td) [h]	Mean td [h]	SD td [h]
	WT 1	1	0.02	5	0.068	0.305944	2.2656
	WT 2	1	0.019	5	0.068	0.318767	2.17446	2.21775	0.0373479
	WT 3	1	0.018	5	0.063	0.313191	2.21318
	ΔbacA1	1	0.017	5	0.05	0.269702	2.57004
	ΔbacA2	1	0.016	5	0.051	0.289809	2.39174	2.51061	0.0840554
	ΔbacA3	1	0.017	5	0.05	0.269702	2.57004
	ΔbacD1	1	0.023	5	0.075	0.295498	2.34569
	ΔbacD2	1	0.026	5	0.078	0.274653	2.52372	2.2005	0.339089
	ΔbacD3	1	0.023	5	0.114	0.400176	1.73211
	ΔbacAD1	1	0.022	5	0.091	0.354954	1.95278
	ΔbacAD2	1	0.017	5	0.083	0.396407	1.74858	1.88138	0.0939968
	ΔbacAD3	1	0.018	5	0.075	0.356779	1.94279

## Sheet: Fig. 9GH
	Time [s]	No peptide	1 µM	2.5 µM	5 µM	10 µM	20 µM	30 µM	40 µM	60 µM		Condition [µM]	Wavelength shift [nm]
	0	0	0	0	0	0	0	0	0	0		0	0.130663
	0.2	4.364e-05	0.0008	-9e-05	-0.00171	-0.00036	-0.00049	0.00016	-6e-05	-0.00031		1	0.28271
	0.4	-0.00068785	0.00108	0.00032	-0.00108	-0.00058	-0.00157	0.00116	-0.00093	0.00042		2.5	0.6128
	0.6	-0.00149858	0.00098	0.00023	-0.0005	-0.00162	-0.00105	0.00018	0.00053	0.00083		5	0.80285
	0.8	-0.00191478	0.00141	-0.00075	-0.00149	-0.00299	-0.00166	0.00149	0.00042	9e-05		10	1.38161
	1	-0.00240409	0.00146	-0.00059	-0.00131	-0.00329	-0.00074	0.00194	0.00117	0.00086		20	1.77409
	1.2	-0.00221301	0.00071	0.00073	-0.00128	-0.00301	-0.00015	0.00146	-0.00061	-0.00026		30	2.08432
	1.4	-0.0022517	0.00012	0.00062	-0.00138	-0.003	-0.00042	0.00048	-0.00031	-0.00051		40	2.27883
	1.6	-0.00155836	-0.00121	0.00202	-0.00208	-0.00222	-0.00128	0.00038	-0.00174	-0.00076		60	2.43655
	1.8	-0.00171196	-0.00106	0.00325	-0.00261	-0.00204	-0.00122	-0.00141	-0.00157	-0.00024
	2	-0.00064518	-0.00115	0.00184	-0.00284	-0.00224	-0.00081	-0.00217	-0.00274	-0.00155
	2.2	-0.00070813	-0.0008	-2e-05	-0.00245	-0.00185	-0.00099	-0.00241	-0.00217	-2e-05
	2.4	-0.00027521	2e-05	-0.0009	-0.00273	-0.00153	-0.00062	-0.00272	-0.00296	-0.00068
	2.6	0.00039056	0.00054	-0.00197	-0.0021	-0.00231	-0.00057	-0.00261	-0.0035	4e-05
	2.8	0.00114455	-4e-05	-0.00347	-0.00211	-0.00225	-0.00139	-0.00299	-0.00388	-0.00029
	3	0.00168298	0.00012	-0.00323	-0.00159	-0.00087	-0.00322	-0.00376	-0.00346	0.00053
	3.2	0.00149285	-0.00015	-0.00168	-0.00118	-0.00207	-0.00395	-0.00339	-0.00355	-0.00094
	3.4	0.00171051	-0.0003	-0.00142	-0.00135	-0.00238	-0.00449	-0.00241	-0.00395	-0.00086
	3.6	0.00024243	-0.00082	-0.00256	-0.00282	-0.00222	-0.00463	-0.00218	-0.00308	-0.00139
	3.8	0.00104599	-0.00093	-0.0022	-0.00285	-0.00375	-0.00388	-0.00114	-0.0031	-0.00115
	4	0.00084235	-0.00164	-0.00131	-0.00263	-0.00507	-0.0026	-0.00052	-0.00335	-0.00136
	4.2	0.00034785	-0.00213	-0.00222	-0.00385	-0.00555	-0.00287	0.0008	-0.00377	-0.00098
	4.4	0.00059289	-0.0027	-0.00266	-0.00394	-0.00595	-0.00295	-0.0004	-0.00376	-0.00019
	4.6	0.00129305	-0.002	-0.00221	-0.00374	-0.00627	-0.00303	-2e-05	-0.00488	0.00017
	4.8	0.00032442	-0.00275	-0.00246	-0.00395	-0.00591	-0.00288	-0.00035	-0.00562	-0.00016
	5	0.00014088	-0.00168	-0.00263	-0.00408	-0.0055	-0.00381	0.00011	-0.00642	-8e-05
	5.2	0.00059791	-0.00132	-0.0033	-0.00503	-0.00605	-0.0044	-0.00188	-0.00561	-0.00055
	5.4	0.0005606	-0.00058	-0.00316	-0.00528	-0.00599	-0.00424	-0.00074	-0.00527	-0.00103
	5.6	9.678e-05	-0.00107	-0.00212	-0.00485	-0.00585	-0.00488	-0.00159	-0.00465	-0.00193
	5.8	0.00025843	-0.00089	-0.00279	-0.0045	-0.00544	-0.00524	-0.0015	-0.00531	-0.00148
	6	0.0004129	-0.00106	-0.00252	-0.00635	-0.00616	-0.00541	-0.00189	-0.0048	-0.00177
	6.2	0.00082958	-0.00104	-0.00173	-0.00441	-0.00448	-0.00465	-0.00115	-0.0056	-0.00173
	6.4	0.00118253	-0.00229	-0.00224	-0.00423	-0.00552	-0.00518	-0.00234	-0.00613	-0.00112
	6.6	0.00118483	-0.00129	-0.00243	-0.00538	-0.00536	-0.00565	-0.00208	-0.00666	-0.00096
	6.8	0.00051868	-0.00069	-0.00213	-0.00531	-0.0061	-0.00568	-0.00207	-0.00577	-0.00149
	7	-0.00060043	-0.00124	-0.00229	-0.00407	-0.0052	-0.00542	-0.0019	-0.0069	-0.00067
	7.2	-4.357e-05	-0.00169	-0.00318	-0.00531	-0.00547	-0.00569	-0.00165	-0.00606	-0.00103
	7.4	-0.00092517	-0.00148	-0.00207	-0.00447	-0.00497	-0.006	-0.00217	-0.00594	-0.00155
	7.6	-0.00023336	-0.00204	-0.00321	-0.004	-0.00536	-0.00465	-0.0024	-0.00531	-0.0012
	7.8	0.00136601	-0.00309	-0.00221	-0.0051	-0.00403	-0.00552	-0.00217	-0.00579	-0.00102
	8	0.00158771	-0.0022	-0.00315	-0.00628	-0.00435	-0.00535	-0.00134	-0.00621	-0.0006
	8.2	0.00088715	-0.00319	-0.00288	-0.00644	-0.00496	-0.00577	-0.00234	-0.00763	-0.0009
	8.4	0.00210656	-0.00312	-0.00371	-0.00737	-0.00531	-0.005	-0.00195	-0.00738	-0.00137
	8.6	0.00142738	-0.00383	-0.00343	-0.00712	-0.00509	-0.00641	-0.0013	-0.00881	-0.0021
	8.8	0.00051445	-0.00276	-0.00372	-0.00703	-0.00502	-0.00617	-0.00213	-0.00932	-0.00262
	9	0.00100735	-0.0033	-0.0037	-0.00545	-0.00534	-0.00779	-0.00296	-0.00873	-0.00387
	9.2	0.00076343	-0.0025	-0.00408	-0.00582	-0.00581	-0.00782	-0.00224	-0.00838	-0.00276
	9.4	0.00109149	-0.00311	-0.0044	-0.00663	-0.00568	-0.00831	-0.00279	-0.00883	-0.00245
	9.6	0.00108234	-0.00332	-0.00469	-0.00608	-0.00669	-0.008	-0.00362	-0.00767	-0.00122
	9.8	0.00059704	-0.00403	-0.00499	-0.00565	-0.00874	-0.00868	-0.00386	-0.0075	-0.00147
	10	0.00091242	-0.00497	-0.00516	-0.00686	-0.00787	-0.00853	-0.00456	-0.00697	-0.00203
	10.2	0.00156253	-0.00569	-0.00488	-0.00656	-0.00839	-0.0084	-0.00538	-0.00799	-0.0021
	10.4	-4.332e-05	-0.00511	-0.00455	-0.00721	-0.00789	-0.00948	-0.00429	-0.00854	-0.00229
	10.6	-0.00018413	-0.00565	-0.00466	-0.00799	-0.00739	-0.0096	-0.00452	-0.01042	-0.00287
	10.8	0.00031512	-0.0052	-0.005	-0.00777	-0.00722	-0.00911	-0.00393	-0.01087	-0.00263
	11	-0.00038578	-0.00542	-0.0048	-0.00809	-0.0082	-0.00895	-0.0034	-0.01107	-0.00198
	11.2	-0.00046449	-0.00493	-0.00442	-0.0075	-0.0076	-0.00947	-0.00326	-0.01038	-0.00259
	11.4	0.00054546	-0.00554	-0.00441	-0.00736	-0.00852	-0.00888	-0.00316	-0.01	-0.0027
	11.6	0.00104463	-0.00433	-0.00305	-0.00739	-0.00838	-0.00874	-0.00276	-0.00934	-0.00277
	11.8	0.00094973	-0.00569	-0.00294	-0.00759	-0.00798	-0.00847	-0.003	-0.00848	-0.00368
	12	0.00100202	-0.00583	-0.00301	-0.00794	-0.00779	-0.0077	-0.00283	-0.00874	-0.00403
	12.2	0.00149241	-0.00541	-0.00428	-0.00917	-0.0082	-0.00776	-0.00317	-0.00869	-0.0039
	12.4	0.00133008	-0.00571	-0.00505	-0.00817	-0.00799	-0.00836	-0.00354	-0.00981	-0.00471
	12.6	0.00138936	-0.00661	-0.00601	-0.00729	-0.00843	-0.00875	-0.0045	-0.01	-0.00392
	12.8	0.00194531	-0.00655	-0.00701	-0.00767	-0.00748	-0.00841	-0.00435	-0.01012	-0.00359
	13	0.00244893	-0.00562	-0.0063	-0.00633	-0.0075	-0.00878	-0.00494	-0.01017	-0.00351
	13.2	0.00325147	-0.00614	-0.00522	-0.00496	-0.00783	-0.00748	-0.00405	-0.01129	-0.00254
	13.4	0.00235361	-0.00609	-0.00434	-0.00519	-0.00816	-0.00674	-0.00532	-0.01105	-0.00206
	13.6	0.00296527	-0.00602	-0.00432	-0.00641	-0.00761	-0.00633	-0.00447	-0.01155	-0.00226
	13.8	0.00253013	-0.00578	-0.0036	-0.00691	-0.00864	-0.00655	-0.00518	-0.01213	-0.00149
	14	0.00240648	-0.00612	-0.00474	-0.00885	-0.00941	-0.00679	-0.00467	-0.01338	-0.00197
	14.2	0.00077431	-0.00664	-0.00504	-0.0092	-0.01036	-0.00783	-0.0052	-0.0124	-0.00304
	14.4	0.0011884	-0.00596	-0.00639	-0.0098	-0.01083	-0.00779	-0.00439	-0.01172	-0.00247
	14.6	0.00049386	-0.00535	-0.00788	-0.00998	-0.01082	-0.00809	-0.0053	-0.01149	-0.0038
	14.8	0.00108846	-0.00585	-0.00752	-0.01013	-0.01083	-0.0089	-0.00495	-0.01127	-0.00345
	15	0.00066902	-0.00629	-0.00725	-0.00926	-0.01026	-0.00918	-0.00572	-0.01084	-0.00323
	15.2	0.00205828	-0.00634	-0.00786	-0.01077	-0.00957	-0.00932	-0.00617	-0.01226	-0.00275
	15.4	0.00160015	-0.00605	-0.00789	-0.01089	-0.00836	-0.00907	-0.00639	-0.01279	-0.00333
	15.6	0.00228363	-0.00567	-0.00626	-0.01035	-0.00919	-0.00987	-0.00621	-0.01297	-0.00287
	15.8	0.00189528	-0.00538	-0.00661	-0.0099	-0.00967	-0.01013	-0.00673	-0.01357	-0.00327
	16	0.00201628	-0.00493	-0.00585	-0.00902	-0.01111	-0.00991	-0.00667	-0.01366	-0.00308
	16.2	0.00068801	-0.0041	-0.00517	-0.00866	-0.01155	-0.01055	-0.00669	-0.01252	-0.00381
	16.4	0.00152599	-0.00454	-0.00455	-0.00739	-0.01265	-0.01183	-0.00657	-0.01295	-0.00323
	16.6	0.00093895	-0.00537	-0.00504	-0.00806	-0.01228	-0.0111	-0.00639	-0.01289	-0.00311
	16.8	0.00090489	-0.00492	-0.00562	-0.00822	-0.01243	-0.01173	-0.00678	-0.01244	-0.00343
	17	0.0006384	-0.00535	-0.00658	-0.00912	-0.01098	-0.0118	-0.0074	-0.0117	-0.00386
	17.2	0.00119746	-0.00564	-0.00767	-0.00857	-0.0101	-0.01144	-0.00725	-0.01193	-0.00364
	17.4	0.00105093	-0.00628	-0.00718	-0.00881	-0.00968	-0.01094	-0.00736	-0.01257	-0.00388
	17.6	0.00056363	-0.00639	-0.00775	-0.00815	-0.0099	-0.01149	-0.0072	-0.01252	-0.00379
	17.8	0.00082866	-0.00721	-0.00686	-0.00884	-0.01054	-0.01008	-0.00595	-0.01234	-0.00352
	18	0.00032948	-0.00734	-0.00728	-0.00803	-0.01189	-0.0106	-0.00449	-0.01292	-0.0044
	18.2	0.00068066	-0.00691	-0.00692	-0.00811	-0.01262	-0.0106	-0.00476	-0.01396	-0.00413
	18.4	0.00025373	-0.0064	-0.00763	-0.0084	-0.01252	-0.01064	-0.00559	-0.01378	-0.00455
	18.6	0.0012908	-0.00613	-0.00705	-0.00959	-0.0133	-0.01022	-0.00624	-0.0137	-0.00558
	18.8	0.00128937	-0.00577	-0.00768	-0.0083	-0.01206	-0.01035	-0.00724	-0.01535	-0.00521
	19	0.00207127	-0.00558	-0.00707	-0.00944	-0.01104	-0.01023	-0.00792	-0.01542	-0.00433
	19.2	0.00235625	-0.00639	-0.00668	-0.00968	-0.01096	-0.00976	-0.0074	-0.0154	-0.00432
	19.4	0.00268724	-0.00563	-0.0074	-0.01019	-0.01047	-0.00946	-0.00722	-0.01464	-0.00407
	19.6	0.0016564	-0.00596	-0.00749	-0.00871	-0.0091	-0.00943	-0.00769	-0.01525	-0.00412
	19.8	0.00156888	-0.00544	-0.00788	-0.01017	-0.00884	-0.01033	-0.00724	-0.01409	-0.00378
	20	0.130061	0.11043	0.07292	0.09797	0.11229	0.13009	0.12785	0.10572	0.12783
	20.2	0.12223	0.10769	0.06932	0.08944	0.11412	0.13077	0.12784	0.11707	0.15114
	20.4	0.11433	0.1086	0.07365	0.09053	0.11662	0.13396	0.13391	0.12683	0.17147
	20.6	0.1099	0.1087	0.06964	0.0869	0.12079	0.1357	0.14378	0.1409	0.18948
	20.8	0.102686	0.09883	0.07228	0.08634	0.12402	0.13988	0.15077	0.15459	0.20785
	21	0.0988375	0.09997	0.07117	0.08439	0.12576	0.14393	0.15701	0.16534	0.22973
	21.2	0.0964875	0.09982	0.07322	0.08512	0.12929	0.14673	0.16591	0.17973	0.24707
	21.4	0.0945235	0.09759	0.07335	0.08487	0.13223	0.15048	0.17404	0.19313	0.26367
	21.6	0.091341	0.0963	0.07518	0.08575	0.13413	0.15347	0.18125	0.20482	0.28096
	21.8	0.089222	0.0971	0.07585	0.08603	0.13689	0.157	0.18937	0.21806	0.29872
	22	0.0876559	0.09659	0.07817	0.08657	0.13948	0.16059	0.19668	0.23019	0.31348
	22.2	0.0835521	0.09551	0.07867	0.08706	0.14242	0.16591	0.20424	0.23903	0.33069
	22.4	0.0812432	0.09757	0.07919	0.08778	0.14551	0.17087	0.21307	0.25026	0.34707
	22.6	0.0804906	0.09694	0.08039	0.08822	0.14904	0.1767	0.22093	0.2607	0.36268
	22.8	0.0807368	0.09852	0.08111	0.08928	0.15169	0.1814	0.22788	0.27054	0.37604
	23	0.0775797	0.09832	0.08157	0.09007	0.15582	0.18523	0.23503	0.28081	0.38965
	23.2	0.0783985	0.09823	0.08112	0.09133	0.15686	0.18998	0.24172	0.29063	0.40191
	23.4	0.0768274	0.0984	0.0828	0.0924	0.15914	0.19377	0.24816	0.30021	0.41471
	23.6	0.0754774	0.10051	0.08271	0.09351	0.16184	0.19883	0.25452	0.30882	0.42903
	23.8	0.0745786	0.09939	0.08381	0.09464	0.16493	0.20354	0.26224	0.31819	0.44058
	24	0.0733057	0.09831	0.08448	0.09721	0.16682	0.20795	0.269	0.32742	0.45105
	24.2	0.0722249	0.09828	0.08579	0.09777	0.17072	0.2108	0.27599	0.33649	0.46294
	24.4	0.072635	0.09645	0.08553	0.09892	0.1737	0.21546	0.28269	0.34409	0.47434
	24.6	0.0725903	0.09467	0.08642	0.10044	0.17637	0.21868	0.28986	0.3542	0.48414
	24.8	0.0701697	0.0947	0.08733	0.10204	0.17815	0.22297	0.29529	0.36192	0.49651
	25	0.0707233	0.09524	0.08767	0.10228	0.1812	0.22765	0.30272	0.36975	0.50848
	25.2	0.0692831	0.09586	0.08828	0.10371	0.18353	0.232	0.30903	0.37817	0.52053
	25.4	0.0690801	0.09659	0.08871	0.10492	0.18643	0.23572	0.31511	0.38844	0.53156
	25.6	0.0675235	0.09727	0.08921	0.10585	0.18934	0.24026	0.32182	0.39402	0.54287
	25.8	0.0678639	0.09794	0.08986	0.1075	0.19158	0.24432	0.32863	0.40218	0.55097
	26	0.0669872	0.09682	0.09066	0.10854	0.19367	0.24731	0.33377	0.41031	0.56051
	26.2	0.0670244	0.09644	0.09076	0.10928	0.19685	0.2534	0.34013	0.4162	0.56777
	26.4	0.0655518	0.09562	0.09188	0.11054	0.19858	0.25865	0.3465	0.42219	0.57593
	26.6	0.0663358	0.09578	0.09242	0.11132	0.20038	0.26271	0.35151	0.43211	0.58487
	26.8	0.0665015	0.09544	0.0919	0.11126	0.20447	0.26706	0.35748	0.43962	0.59553
	27	0.0663847	0.09527	0.09242	0.11204	0.20629	0.27185	0.36356	0.44742	0.60445
	27.2	0.0663272	0.096	0.09303	0.11316	0.20834	0.27508	0.36871	0.45414	0.61474
	27.4	0.0671685	0.09621	0.0928	0.11317	0.21042	0.27709	0.37451	0.46148	0.62423
	27.6	0.0671646	0.09636	0.09386	0.11458	0.21261	0.28147	0.38236	0.46625	0.63249
	27.8	0.0663981	0.09634	0.09505	0.11539	0.21362	0.2858	0.38688	0.47378	0.64091
	28	0.0657104	0.09862	0.09522	0.11678	0.21704	0.28859	0.39235	0.48043	0.64795
	28.2	0.0651671	0.0967	0.09647	0.11878	0.21987	0.29249	0.39833	0.48945	0.6553
	28.4	0.0638307	0.0959	0.09799	0.12074	0.22217	0.29699	0.40267	0.49566	0.66257
	28.6	0.0636857	0.09424	0.09781	0.12165	0.22454	0.30047	0.40744	0.50349	0.6709
	28.8	0.0627571	0.093	0.09747	0.12302	0.2274	0.30297	0.41325	0.50923	0.68
	29	0.0631193	0.09212	0.09854	0.1242	0.22928	0.30843	0.41853	0.51566	0.68902
	29.2	0.0633679	0.093	0.0985	0.12408	0.23164	0.31214	0.4245	0.52097	0.69656
	29.4	0.0628297	0.0942	0.09999	0.12471	0.23429	0.31614	0.43024	0.52695	0.70485
	29.6	0.064275	0.09513	0.10126	0.12508	0.23652	0.31946	0.4346	0.53303	0.71186
	29.8	0.064818	0.0945	0.10184	0.1261	0.23853	0.32422	0.44034	0.53929	0.71816
	30	0.0650076	0.09415	0.10269	0.12644	0.24105	0.32721	0.44491	0.54472	0.72655
	30.2	0.0656364	0.09351	0.10413	0.12751	0.24321	0.33006	0.44948	0.55119	0.73482
	30.4	0.0666199	0.09188	0.10312	0.12884	0.24545	0.33326	0.45549	0.55782	0.74349
	30.6	0.063376	0.09115	0.10298	0.13032	0.24789	0.33674	0.46172	0.56386	0.75022
	30.8	0.0638048	0.09166	0.10363	0.13168	0.25078	0.33965	0.4654	0.56957	0.75782
	31	0.0633588	0.09158	0.10398	0.13208	0.25319	0.34267	0.47098	0.57575	0.76448
	31.2	0.0617133	0.09119	0.10398	0.13294	0.25402	0.34774	0.47537	0.58024	0.77151
	31.4	0.0609274	0.09176	0.10517	0.13295	0.25642	0.35212	0.47912	0.58592	0.7779
	31.6	0.06223	0.09219	0.10628	0.13406	0.26005	0.35595	0.48278	0.59169	0.784
	31.8	0.062071	0.09214	0.10785	0.13499	0.26168	0.35964	0.48863	0.5967	0.78936
	32	0.061812	0.09253	0.10829	0.13654	0.26208	0.3638	0.4921	0.60081	0.79483
	32.2	0.0620608	0.09224	0.10932	0.13806	0.26433	0.36652	0.49726	0.60786	0.80107
	32.4	0.0614969	0.09203	0.10986	0.14007	0.26618	0.36789	0.50157	0.61366	0.80911
	32.6	0.0606871	0.09231	0.11045	0.14141	0.26676	0.37186	0.50638	0.61758	0.81608
	32.8	0.0600172	0.09284	0.10993	0.14291	0.26943	0.37478	0.50999	0.62375	0.82285
	33	0.0613199	0.09174	0.11134	0.14494	0.27251	0.37873	0.51521	0.62963	0.8297
	33.2	0.0621296	0.09406	0.11097	0.14572	0.27434	0.38163	0.52024	0.63389	0.83479
	33.4	0.0627127	0.09365	0.11156	0.14796	0.2761	0.38686	0.52509	0.63798	0.83875
	33.6	0.0626873	0.09335	0.11191	0.1479	0.27726	0.39006	0.53003	0.645	0.84504
	33.8	0.0625123	0.09421	0.11316	0.14708	0.27835	0.39393	0.53512	0.64836	0.84992
	34	0.0620037	0.09613	0.11291	0.1479	0.28126	0.3961	0.53951	0.65373	0.85558
	34.2	0.0618606	0.09555	0.11364	0.14864	0.2842	0.39959	0.5423	0.65943	0.86231
	34.4	0.0618568	0.09738	0.11429	0.14856	0.28637	0.4019	0.5474	0.66613	0.86896
	34.6	0.0613046	0.09692	0.11485	0.15103	0.28872	0.40501	0.55091	0.67107	0.87503
	34.8	0.061367	0.09629	0.1154	0.15212	0.29086	0.4076	0.55576	0.67659	0.88217
	35	0.0602466	0.09512	0.11631	0.15253	0.29248	0.41183	0.55965	0.68126	0.88802
	35.2	0.0602041	0.09555	0.11762	0.15343	0.29215	0.41454	0.56325	0.68704	0.89427
	35.4	0.0599995	0.09482	0.11846	0.15379	0.29458	0.41951	0.56699	0.69159	0.89884
	35.6	0.0614536	0.0966	0.11876	0.15402	0.29736	0.42325	0.57174	0.69518	0.90396
	35.8	0.0624556	0.09529	0.1192	0.15641	0.29953	0.42625	0.57513	0.70014	0.90934
	36	0.0624787	0.09636	0.11968	0.15662	0.30044	0.42846	0.57966	0.70492	0.91468
	36.2	0.0615436	0.09599	0.12035	0.1581	0.30599	0.43148	0.58365	0.70915	0.91871
	36.4	0.060693	0.09614	0.12116	0.15867	0.3071	0.4338	0.58722	0.71304	0.92424
	36.6	0.0597969	0.0965	0.12122	0.15962	0.30851	0.43574	0.59171	0.71832	0.92972
	36.8	0.057444	0.09805	0.12181	0.16081	0.30969	0.4394	0.59549	0.72343	0.93517
	37	0.057443	0.09709	0.12244	0.16319	0.3125	0.44267	0.5986	0.72746	0.9398
	37.2	0.0581501	0.0975	0.12314	0.16369	0.3134	0.44588	0.60395	0.73015	0.94579
	37.4	0.0586856	0.09754	0.1248	0.16516	0.31626	0.44815	0.60994	0.736	0.9514
	37.6	0.0590047	0.09523	0.12577	0.16571	0.31773	0.45221	0.61213	0.74085	0.95624
	37.8	0.0596632	0.09626	0.12556	0.16624	0.32099	0.45479	0.61535	0.74467	0.96238
	38	0.061385	0.09405	0.12673	0.16673	0.32288	0.45839	0.61991	0.75119	0.96934
	38.2	0.0609202	0.09266	0.12696	0.16813	0.32525	0.46101	0.62421	0.75543	0.97497
	38.4	0.0602968	0.09184	0.12681	0.16915	0.32616	0.46413	0.62664	0.7591	0.98056
	38.6	0.0614212	0.08988	0.12776	0.16984	0.32915	0.46699	0.63231	0.76376	0.98585
	38.8	0.0627649	0.08639	0.12985	0.17002	0.32989	0.4699	0.63648	0.76823	0.98905
	39	0.0619772	0.0875	0.12997	0.17044	0.33224	0.47306	0.64058	0.77195	0.99328
	39.2	0.0618533	0.0869	0.13023	0.17116	0.33317	0.47653	0.64463	0.77727	0.99885
	39.4	0.0634597	0.08499	0.13043	0.17201	0.33556	0.47955	0.6479	0.78033	1.00322
	39.6	0.0609177	0.08776	0.13176	0.17412	0.33747	0.48213	0.65147	0.78488	1.0086
	39.8	0.05982	0.08789	0.13256	0.17578	0.33966	0.48556	0.65543	0.78902	1.01514
	40	0.0596325	0.08756	0.13276	0.17725	0.34179	0.48783	0.6577	0.79357	1.01959
	40.2	0.0604008	0.08616	0.13415	0.17934	0.34439	0.49043	0.65971	0.79758	1.02353
	40.4	0.0594862	0.08748	0.13393	0.18004	0.34493	0.49374	0.66465	0.80348	1.02822
	40.6	0.0611213	0.08605	0.13353	0.17924	0.34707	0.49605	0.6685	0.80734	1.03281
	40.8	0.0616184	0.08716	0.13387	0.1794	0.34866	0.49843	0.67148	0.81105	1.03619
	41	0.059977	0.08676	0.13499	0.17953	0.34972	0.50133	0.67629	0.81569	1.03974
	41.2	0.0589458	0.08885	0.13459	0.17989	0.35136	0.50341	0.68148	0.82017	1.04508
	41.4	0.0592463	0.08872	0.13668	0.18076	0.35467	0.50553	0.68336	0.82446	1.0489
	41.6	0.0587564	0.08874	0.13789	0.18236	0.35473	0.50876	0.68592	0.82904	1.05229
	41.8	0.0594086	0.08839	0.13794	0.18401	0.35716	0.5106	0.69045	0.83239	1.05782
	42	0.0602735	0.0899	0.13839	0.18532	0.35911	0.51362	0.6924	0.83554	1.06299
	42.2	0.0610811	0.08995	0.1379	0.18497	0.36078	0.51727	0.6951	0.83906	1.06753
	42.4	0.0598646	0.09089	0.13853	0.18553	0.36265	0.5211	0.69921	0.84267	1.07414
	42.6	0.0589149	0.09224	0.13957	0.18724	0.36454	0.52257	0.70322	0.84491	1.07874
	42.8	0.0572902	0.09252	0.14017	0.18847	0.36611	0.52649	0.70569	0.85009	1.08188
	43	0.0576215	0.09172	0.14075	0.18888	0.36691	0.52898	0.71074	0.85426	1.08577
	43.2	0.0568928	0.09089	0.14211	0.19043	0.3686	0.53207	0.71412	0.8577	1.08879
	43.4	0.0579421	0.09057	0.14185	0.19178	0.37027	0.5341	0.71834	0.86117	1.09228
	43.6	0.0579314	0.09026	0.14165	0.19167	0.37361	0.53794	0.72136	0.86597	1.09704
	43.8	0.0581929	0.08903	0.14269	0.19188	0.37509	0.54106	0.72443	0.86966	1.10034
	44	0.0589447	0.08973	0.14317	0.19285	0.37769	0.54343	0.72664	0.87191	1.10506
	44.2	0.0593393	0.08983	0.14455	0.19241	0.37889	0.54665	0.72992	0.87704	1.10962
	44.4	0.0583827	0.0893	0.14536	0.19274	0.38015	0.54836	0.73299	0.88141	1.11243
	44.6	0.0594397	0.08882	0.14523	0.19421	0.38119	0.55073	0.73691	0.88544	1.11734
	44.8	0.0599377	0.09066	0.1458	0.19423	0.38302	0.55326	0.73983	0.88971	1.12251
	45	0.0593916	0.09098	0.14483	0.19402	0.38421	0.55589	0.74426	0.8943	1.12593
	45.2	0.059542	0.09155	0.14614	0.19601	0.38708	0.55665	0.74761	0.89768	1.1295
	45.4	0.0613086	0.09174	0.14684	0.1967	0.38835	0.56055	0.75254	0.90039	1.13423
	45.6	0.061201	0.0923	0.14749	0.19676	0.39037	0.56408	0.75535	0.9036	1.13665
	45.8	0.0610616	0.09082	0.14868	0.19885	0.39262	0.56627	0.75931	0.9074	1.13995
	46	0.061549	0.0905	0.14996	0.20086	0.3942	0.56793	0.76088	0.90984	1.14434
	46.2	0.0609651	0.09087	0.15	0.20099	0.39463	0.5706	0.76428	0.91343	1.14838
	46.4	0.0595399	0.09008	0.14991	0.20165	0.39672	0.57273	0.76576	0.91676	1.15344
	46.6	0.0594041	0.08867	0.15033	0.20305	0.39723	0.57394	0.76888	0.91975	1.15781
	46.8	0.0610206	0.08893	0.15096	0.20269	0.39794	0.57578	0.77195	0.92292	1.16175
	47	0.0608114	0.08706	0.15248	0.2033	0.39926	0.57821	0.77564	0.9266	1.16549
	47.2	0.0608662	0.08752	0.15285	0.20561	0.40131	0.58118	0.77789	0.93024	1.16863
	47.4	0.0607527	0.08788	0.15372	0.20615	0.40328	0.58304	0.78068	0.9338	1.17174
	47.6	0.0614913	0.08895	0.15516	0.20721	0.40558	0.58565	0.78424	0.9374	1.17571
	47.8	0.0598473	0.08864	0.15474	0.2085	0.40776	0.58864	0.7863	0.93989	1.1791
	48	0.0605224	0.08916	0.15562	0.20927	0.41025	0.59278	0.78964	0.94346	1.18221
	48.2	0.0602551	0.08715	0.1558	0.20941	0.41257	0.59522	0.79381	0.94711	1.18525
	48.4	0.0594008	0.08789	0.15684	0.21096	0.41434	0.59794	0.79668	0.95039	1.18878
	48.6	0.0588789	0.08668	0.15669	0.21184	0.41566	0.60014	0.79892	0.95303	1.19069
	48.8	0.0591454	0.08721	0.15772	0.21262	0.4173	0.60295	0.80321	0.9562	1.19371
	49	0.0568958	0.08747	0.1566	0.21324	0.41858	0.60418	0.80641	0.9586	1.19817
	49.2	0.0573635	0.08776	0.15787	0.21381	0.42035	0.60586	0.81011	0.9618	1.20216
	49.4	0.0574123	0.08725	0.15844	0.21423	0.4211	0.6081	0.8128	0.96486	1.20586
	49.6	0.057502	0.0882	0.15912	0.21439	0.42298	0.61051	0.81657	0.96802	1.21079
	49.8	0.0573457	0.08665	0.16007	0.21536	0.42433	0.61193	0.81831	0.97236	1.21473
	50	0.0588784	0.08702	0.16079	0.21693	0.42562	0.61439	0.82219	0.97654	1.21744
	50.2	0.0575462	0.08735	0.16012	0.21746	0.42723	0.61663	0.8236	0.9799	1.22149
	50.4	0.058671	0.08887	0.15991	0.22008	0.42919	0.61857	0.82817	0.98325	1.22494
	50.6	0.0578023	0.08881	0.16048	0.22108	0.43028	0.62121	0.83115	0.98678	1.22752
	50.8	0.0586423	0.09059	0.16017	0.22209	0.43167	0.62244	0.83533	0.99096	1.23013
	51	0.0586548	0.0913	0.16097	0.22279	0.43482	0.62613	0.8388	0.9937	1.23342
	51.2	0.058777	0.0922	0.16182	0.22365	0.43614	0.62934	0.84181	0.99663	1.23694
	51.4	0.0598531	0.09158	0.16289	0.2241	0.43701	0.63141	0.84378	0.99941	1.2402
	51.6	0.0593703	0.09178	0.16471	0.22376	0.43884	0.63304	0.84514	1.00331	1.24495
	51.8	0.0587558	0.09063	0.16494	0.22451	0.44039	0.63644	0.84709	1.00491	1.24875
	52	0.0588631	0.08932	0.16621	0.22411	0.4407	0.63741	0.85022	1.00833	1.2528
	52.2	0.0599793	0.08859	0.16693	0.22518	0.4426	0.63902	0.85365	1.01154	1.2555
	52.4	0.058251	0.08778	0.16785	0.22542	0.44358	0.64189	0.85685	1.01536	1.2583
	52.6	0.0590578	0.08787	0.16557	0.22744	0.44562	0.64542	0.85965	1.01837	1.26182
	52.8	0.0597656	0.09001	0.16651	0.22776	0.44693	0.6475	0.86215	1.02161	1.26501
	53	0.0597226	0.09205	0.16623	0.22863	0.44884	0.64962	0.86396	1.0243	1.26779
	53.2	0.059309	0.09271	0.16642	0.22918	0.44945	0.65229	0.86699	1.02694	1.27218
	53.4	0.0594607	0.0926	0.1659	0.22905	0.45277	0.65367	0.86922	1.03029	1.27607
	53.6	0.0601	0.09332	0.16857	0.23017	0.45403	0.65557	0.87346	1.03375	1.27768
	53.8	0.059236	0.09248	0.16924	0.23138	0.4567	0.6572	0.87594	1.03613	1.28023
	54	0.0605345	0.09265	0.16997	0.23377	0.45823	0.66032	0.87859	1.03952	1.28241
	54.2	0.0611703	0.09258	0.171	0.23461	0.46016	0.6625	0.88002	1.04307	1.28453
	54.4	0.0609888	0.09344	0.17167	0.23616	0.46154	0.66523	0.883	1.04589	1.2876
	54.6	0.0613016	0.0939	0.1723	0.23641	0.46306	0.66783	0.88483	1.04948	1.29137
	54.8	0.0614851	0.09267	0.17214	0.23703	0.46449	0.67052	0.88815	1.05398	1.29631
	55	0.0593489	0.0918	0.17233	0.23728	0.46635	0.67228	0.89022	1.05614	1.29957
	55.2	0.0603375	0.09149	0.17251	0.23785	0.46772	0.6747	0.8935	1.0586	1.30265
	55.4	0.0612832	0.09194	0.17369	0.23853	0.46861	0.67668	0.89526	1.06078	1.30474
	55.6	0.0607011	0.09263	0.17284	0.23994	0.46867	0.67847	0.89865	1.06193	1.30677
	55.8	0.0615174	0.09467	0.17425	0.2405	0.46983	0.68087	0.90232	1.06444	1.30885
	56	0.0621683	0.09585	0.17548	0.24161	0.47	0.68274	0.90647	1.06828	1.31201
	56.2	0.0603203	0.09584	0.17622	0.24192	0.47149	0.68488	0.9087	1.07207	1.31411
	56.4	0.06026	0.09589	0.17675	0.24296	0.47321	0.68691	0.91145	1.07507	1.31842
	56.6	0.0605964	0.09641	0.17796	0.24308	0.47557	0.6884	0.91331	1.07732	1.32093
	56.8	0.0606339	0.09629	0.17849	0.24328	0.47788	0.69075	0.91531	1.08091	1.32398
	57	0.0604127	0.09537	0.1782	0.24343	0.47909	0.69284	0.91752	1.08253	1.32752
	57.2	0.0611082	0.09616	0.17817	0.24473	0.48068	0.69525	0.92071	1.0836	1.3316
	57.4	0.0618537	0.09659	0.1778	0.24491	0.48065	0.69794	0.92414	1.08838	1.33352
	57.6	0.0613489	0.09512	0.17867	0.24592	0.48245	0.70055	0.92726	1.09196	1.33699
	57.8	0.0605362	0.09477	0.17904	0.24788	0.48237	0.70289	0.93005	1.09345	1.33931
	58	0.0600839	0.09547	0.18036	0.24835	0.48479	0.70617	0.93315	1.0976	1.34294
	58.2	0.0598559	0.09688	0.18146	0.25005	0.4862	0.70741	0.93463	1.10094	1.34604
	58.4	0.0597387	0.09708	0.18278	0.25046	0.48883	0.70873	0.93733	1.10206	1.34749
	58.6	0.0603839	0.0981	0.18312	0.25132	0.49091	0.71077	0.93991	1.10458	1.35025
	58.8	0.0614756	0.09721	0.18335	0.25148	0.49256	0.71326	0.9431	1.10794	1.3547
	59	0.0612718	0.09603	0.1827	0.2522	0.49459	0.71441	0.94386	1.1101	1.35592
	59.2	0.0616863	0.09566	0.18372	0.25238	0.49569	0.71658	0.9468	1.11312	1.35746
	59.4	0.0614373	0.09335	0.18389	0.25341	0.498	0.71817	0.94922	1.11593	1.36207
	59.6	0.0623438	0.09227	0.18437	0.25388	0.49847	0.72022	0.95163	1.11929	1.36555
	59.8	0.0609767	0.09257	0.18637	0.25526	0.50012	0.72159	0.95331	1.12176	1.36652
	60	0.0616769	0.09278	0.18719	0.25617	0.50081	0.72491	0.95665	1.12371	1.36936
	60.2	0.0605479	0.09127	0.1877	0.25572	0.50241	0.72739	0.9594	1.12661	1.3724
	60.4	0.0602224	0.09168	0.1884	0.25721	0.50274	0.73017	0.96147	1.12884	1.37445
	60.6	0.0590342	0.09205	0.18898	0.25837	0.50461	0.73224	0.96345	1.13083	1.37547
	60.8	0.060036	0.09153	0.18831	0.25783	0.50577	0.73408	0.96575	1.13296	1.37981
	61	0.0597488	0.09118	0.18988	0.25807	0.50721	0.73468	0.96777	1.13676	1.38225
	61.2	0.0602164	0.0918	0.18971	0.26041	0.50911	0.73696	0.96995	1.13788	1.38515
	61.4	0.0610698	0.09013	0.18947	0.26106	0.50974	0.73905	0.97212	1.14179	1.38816
	61.6	0.0611718	0.08906	0.19	0.26033	0.51014	0.7403	0.97382	1.14463	1.39227
	61.8	0.0611198	0.0894	0.19077	0.2617	0.51201	0.74304	0.97743	1.14819	1.39359
	62	0.0603434	0.09043	0.19055	0.26339	0.51274	0.74589	0.9794	1.15019	1.39669
	62.2	0.0601229	0.09064	0.19087	0.26288	0.5133	0.74781	0.98162	1.15271	1.39837
	62.4	0.0593761	0.0926	0.19197	0.26363	0.51582	0.75025	0.98437	1.15444	1.40099
	62.6	0.0592278	0.09297	0.19218	0.26491	0.51815	0.75241	0.98819	1.15748	1.40308
	62.8	0.0586441	0.09382	0.192	0.26674	0.51898	0.75273	0.98868	1.1591	1.40592
	63	0.0604351	0.09366	0.19239	0.2669	0.51976	0.75439	0.99158	1.16203	1.40755
	63.2	0.0607098	0.09381	0.19365	0.26864	0.52153	0.75538	0.99466	1.16677	1.40999
	63.4	0.0610521	0.09337	0.19446	0.26878	0.52288	0.75655	0.99769	1.16826	1.41204
	63.6	0.0624735	0.09274	0.19485	0.27041	0.52388	0.75819	1.00021	1.17097	1.41392
	63.8	0.0638343	0.09219	0.1953	0.27054	0.52561	0.75936	1.00308	1.17406	1.41693
	64	0.0635118	0.09239	0.19617	0.27157	0.52825	0.76094	1.00576	1.17708	1.4211
	64.2	0.0645497	0.0913	0.19669	0.2725	0.52956	0.76396	1.00691	1.17836	1.42416
	64.4	0.0643528	0.09239	0.19658	0.27348	0.53149	0.76632	1.00719	1.18099	1.42738
	64.6	0.0629528	0.09316	0.19744	0.27393	0.53264	0.76872	1.01022	1.18298	1.42966
	64.8	0.0609383	0.09366	0.19811	0.27407	0.5342	0.77271	1.01241	1.18565	1.43248
	65	0.0607892	0.09227	0.19884	0.27392	0.53583	0.77411	1.01457	1.18702	1.43497
	65.2	0.0601161	0.09372	0.19945	0.27417	0.53813	0.77526	1.01829	1.18979	1.43765
	65.4	0.0607626	0.09436	0.19991	0.27528	0.53801	0.77724	1.02219	1.19238	1.43914
	65.6	0.0602995	0.09562	0.20083	0.27472	0.53804	0.78019	1.02223	1.19413	1.44304
	65.8	0.0617326	0.09666	0.20193	0.27561	0.53994	0.78203	1.02484	1.19588	1.44316
	66	0.0613304	0.09854	0.20179	0.27801	0.54129	0.78432	1.02638	1.19849	1.44548
	66.2	0.0616701	0.09871	0.20169	0.27861	0.54187	0.78692	1.02831	1.20022	1.44774
	66.4	0.0616903	0.09767	0.20247	0.27925	0.54382	0.78873	1.02908	1.20298	1.45113
	66.6	0.0630051	0.0983	0.20142	0.28113	0.54696	0.79015	1.03345	1.2076	1.45231
	66.8	0.0627647	0.097	0.20193	0.28071	0.54737	0.79228	1.03568	1.21029	1.45617
	67	0.0645647	0.09687	0.20362	0.28013	0.54821	0.79432	1.03846	1.21236	1.45777
	67.2	0.0634233	0.09665	0.20496	0.28041	0.5487	0.79532	1.03949	1.21609	1.46029
	67.4	0.0628487	0.09834	0.2056	0.2807	0.55086	0.79629	1.04209	1.21675	1.46301
	67.6	0.0628154	0.09816	0.20678	0.28129	0.55103	0.79726	1.04396	1.21856	1.46512
	67.8	0.0618847	0.09922	0.20664	0.28264	0.55197	0.7982	1.0455	1.21989	1.46676
	68	0.0605258	0.09922	0.2068	0.28343	0.55318	0.80024	1.04765	1.2216	1.46853
	68.2	0.0618545	0.09876	0.20636	0.28491	0.5549	0.80331	1.05154	1.22267	1.47037
	68.4	0.0614889	0.0976	0.207	0.28556	0.55455	0.80622	1.05409	1.22685	1.47115
	68.6	0.0607785	0.09728	0.20767	0.28666	0.55641	0.80809	1.05519	1.22872	1.47337
	68.8	0.0612913	0.09746	0.20862	0.28786	0.55745	0.81057	1.05777	1.23193	1.47552
	69	0.0614539	0.09795	0.20766	0.2888	0.559	0.81213	1.06028	1.23458	1.47924
	69.2	0.0609878	0.09947	0.20877	0.288	0.56054	0.81377	1.06156	1.23577	1.48208
	69.4	0.0622728	0.10073	0.20832	0.28913	0.56366	0.81537	1.06452	1.23677	1.48518
	69.6	0.0628571	0.10121	0.20829	0.29022	0.56603	0.81838	1.0669	1.23763	1.48724
	69.8	0.0634071	0.10104	0.20795	0.29072	0.56737	0.81997	1.06851	1.23888	1.48964
	70	0.0639265	0.10029	0.20915	0.29182	0.56831	0.82221	1.07052	1.24111	1.49049
	70.2	0.0630608	0.09989	0.20908	0.29373	0.57035	0.82237	1.07243	1.24476	1.49296
	70.4	0.0636714	0.1015	0.21035	0.29406	0.57052	0.82412	1.0731	1.24874	1.49622
	70.6	0.0625408	0.10088	0.21044	0.2932	0.5702	0.82467	1.07694	1.25118	1.49905
	70.8	0.0631781	0.10114	0.21149	0.29407	0.57197	0.82624	1.07878	1.25477	1.50135
	71	0.0631235	0.10256	0.21231	0.29569	0.57393	0.82768	1.08121	1.25694	1.50362
	71.2	0.0638625	0.10271	0.21275	0.29579	0.57505	0.83068	1.0837	1.25884	1.50591
	71.4	0.0629575	0.10091	0.21314	0.29595	0.57711	0.83218	1.08622	1.26076	1.50731
	71.6	0.0642962	0.10202	0.21511	0.2973	0.5798	0.83411	1.08688	1.26468	1.50924
	71.8	0.0641404	0.10246	0.2155	0.29705	0.58164	0.83525	1.08943	1.26516	1.5119
	72	0.0643405	0.10234	0.21617	0.29712	0.58296	0.83636	1.09098	1.26825	1.5141
	72.2	0.0650321	0.10215	0.21697	0.29798	0.58357	0.83783	1.09424	1.26996	1.51535
	72.4	0.0643012	0.10381	0.21773	0.29783	0.58299	0.83937	1.09687	1.27261	1.51681
	72.6	0.0651713	0.10394	0.21647	0.29938	0.58304	0.84197	1.09768	1.27311	1.5203
	72.8	0.0649901	0.1038	0.21667	0.3006	0.58347	0.84422	1.0984	1.27654	1.52115
	73	0.0646936	0.10365	0.21646	0.30048	0.58469	0.84762	1.10002	1.27819	1.52372
	73.2	0.0643452	0.10373	0.21751	0.30074	0.58644	0.84873	1.10155	1.28189	1.52635
	73.4	0.0646674	0.10225	0.21729	0.30314	0.58842	0.85077	1.10306	1.28257	1.52716
	73.6	0.0638495	0.10225	0.21851	0.30309	0.59026	0.85247	1.10705	1.28556	1.52772
	73.8	0.0631116	0.10193	0.21908	0.30322	0.59165	0.85432	1.10928	1.28643	1.53029
	74	0.0635097	0.10231	0.21949	0.30365	0.59211	0.85398	1.11202	1.28887	1.53179
	74.2	0.0648344	0.10268	0.21875	0.30499	0.59246	0.85522	1.11318	1.28948	1.53275
	74.4	0.064788	0.10305	0.22056	0.30517	0.59383	0.85765	1.11532	1.29327	1.53485
	74.6	0.0648897	0.10318	0.22167	0.30567	0.59582	0.85984	1.11635	1.29526	1.53697
	74.8	0.065338	0.10448	0.22194	0.3069	0.59798	0.86165	1.11841	1.29843	1.53851
	75	0.0655731	0.10481	0.22276	0.30885	0.59887	0.86462	1.12177	1.29938	1.54133
	75.2	0.0651054	0.10509	0.222	0.30976	0.6002	0.86714	1.12428	1.30137	1.5447
	75.4	0.0654225	0.10504	0.22182	0.30968	0.60186	0.86847	1.12683	1.30284	1.54763
	75.6	0.065809	0.10581	0.22208	0.31125	0.60258	0.86961	1.1293	1.30542	1.55025
	75.8	0.0666461	0.10633	0.22312	0.31193	0.60199	0.87156	1.13217	1.30676	1.5533
	76	0.065245	0.10567	0.22317	0.31073	0.60365	0.8729	1.13187	1.30868	1.55469
	76.2	0.0643567	0.1054	0.22558	0.31186	0.60547	0.87475	1.13324	1.311	1.55585
	76.4	0.0645127	0.10604	0.22515	0.31302	0.60595	0.87655	1.13479	1.31234	1.55787
	76.6	0.0638869	0.10538	0.22512	0.31359	0.60762	0.87773	1.13591	1.31356	1.5594
	76.8	0.0628617	0.10511	0.2246	0.3153	0.60948	0.87924	1.13637	1.31571	1.56091
	77	0.0655128	0.10718	0.22489	0.31643	0.61114	0.8803	1.14111	1.31898	1.56372
	77.2	0.0664944	0.10734	0.22426	0.31634	0.61195	0.88156	1.14377	1.32246	1.56586
	77.4	0.0658234	0.10797	0.225	0.31694	0.6138	0.88273	1.14565	1.32441	1.56743
	77.6	0.0653802	0.11004	0.2261	0.31618	0.61424	0.88389	1.1476	1.32703	1.56945
	77.8	0.0668884	0.10913	0.22714	0.31573	0.61556	0.88486	1.15103	1.32884	1.57085
	78	0.0650807	0.10813	0.22813	0.31617	0.61612	0.88663	1.15127	1.33087	1.57198
	78.2	0.0648456	0.1099	0.22811	0.31758	0.61847	0.88899	1.15313	1.33175	1.57384
	78.4	0.0657218	0.10939	0.22917	0.31896	0.61942	0.88994	1.15477	1.33392	1.57667
	78.6	0.0660201	0.10756	0.2287	0.3199	0.62044	0.8934	1.15799	1.33643	1.57744
	78.8	0.06519	0.10968	0.22895	0.31966	0.62186	0.89591	1.16019	1.3388	1.58011
	79	0.0652464	0.11061	0.2293	0.32139	0.6239	0.89807	1.16194	1.3403	1.58217
	79.2	0.0652866	0.11034	0.23119	0.32123	0.62458	0.8989	1.16311	1.3433	1.58376
	79.4	0.0660297	0.1115	0.2315	0.32263	0.62561	0.90213	1.16414	1.34673	1.58573
	79.6	0.0663751	0.11184	0.2324	0.32364	0.62765	0.90242	1.16468	1.34772	1.58938
	79.8	0.0652682	0.10955	0.23306	0.32541	0.62845	0.90398	1.16642	1.35046	1.59013
	80	0.0649604	0.10877	0.23305	0.32631	0.62777	0.90592	1.16786	1.35249	1.59302
	80.2	0.0653788	0.10878	0.23335	0.32782	0.62963	0.90842	1.17112	1.35359	1.59489
	80.4	0.0659984	0.108	0.23369	0.32768	0.63176	0.9098	1.17415	1.35348	1.59774
	80.6	0.0653699	0.10971	0.23457	0.32883	0.63299	0.91233	1.17738	1.35544	1.59824
	80.8	0.0668924	0.11113	0.23366	0.32943	0.63436	0.91321	1.17911	1.35721	1.60059
	81	0.06653	0.11133	0.23534	0.33042	0.63676	0.9146	1.18067	1.35874	1.60132
	81.2	0.0672425	0.11092	0.23545	0.3309	0.63704	0.91623	1.18177	1.3605	1.60291
	81.4	0.0656558	0.11165	0.23557	0.33119	0.63654	0.91684	1.18294	1.36316	1.60313
	81.6	0.0657309	0.10988	0.23592	0.33093	0.63721	0.91751	1.1839	1.3639	1.60558
	81.8	0.0648455	0.11043	0.23789	0.33096	0.63851	0.92035	1.18617	1.366	1.60812
	82	0.0663766	0.11052	0.23704	0.33006	0.63976	0.92276	1.18836	1.36906	1.60896
	82.2	0.0656259	0.11053	0.23824	0.33001	0.64114	0.92364	1.1902	1.37111	1.61049
	82.4	0.0675289	0.11117	0.23844	0.3317	0.64362	0.92594	1.19279	1.37338	1.61231
	82.6	0.0680354	0.11186	0.23977	0.33251	0.64545	0.92701	1.19381	1.37578	1.61527
	82.8	0.0689601	0.11345	0.24012	0.33334	0.64762	0.92894	1.19536	1.37762	1.61825
	83	0.0694271	0.11457	0.24158	0.33384	0.6493	0.92927	1.19696	1.37992	1.62143
	83.2	0.0695388	0.11658	0.24151	0.33481	0.65031	0.92986	1.19946	1.38189	1.62328
	83.4	0.0681456	0.11601	0.24255	0.33439	0.65186	0.93176	1.20119	1.38407	1.62551
	83.6	0.0677292	0.11614	0.24214	0.33625	0.65269	0.93379	1.20376	1.38605	1.62602
	83.8	0.0678527	0.11412	0.24274	0.33773	0.65406	0.93459	1.20516	1.38813	1.62734
	84	0.0667987	0.11519	0.24328	0.33987	0.65473	0.93609	1.20701	1.38926	1.62907
	84.2	0.0663672	0.11381	0.24389	0.34038	0.65564	0.93843	1.20846	1.39064	1.6323
	84.4	0.0675926	0.11575	0.24358	0.34085	0.65662	0.93964	1.21112	1.39181	1.63411
	84.6	0.0682935	0.11719	0.24373	0.34122	0.65777	0.9423	1.21189	1.39389	1.63546
	84.8	0.0669046	0.1176	0.24411	0.34099	0.65803	0.94417	1.21429	1.39383	1.63665
	85	0.0662128	0.11777	0.24429	0.34053	0.65926	0.94594	1.21615	1.39568	1.63839
	85.2	0.0661343	0.11703	0.24396	0.34144	0.66089	0.94863	1.21675	1.39856	1.63897
	85.4	0.0653431	0.11595	0.24521	0.34291	0.66276	0.94992	1.21822	1.39994	1.64119
	85.6	0.0657127	0.11589	0.24599	0.34243	0.66329	0.95077	1.22035	1.40254	1.64331
	85.8	0.0661613	0.11721	0.24676	0.34402	0.66493	0.9514	1.22133	1.40528	1.6439
	86	0.0679553	0.11664	0.24667	0.34486	0.66607	0.9528	1.22371	1.40642	1.64621
	86.2	0.067898	0.11843	0.24801	0.34517	0.66764	0.95403	1.22635	1.40739	1.64845
	86.4	0.0684956	0.11856	0.24797	0.34469	0.66775	0.95616	1.22746	1.41094	1.64927
	86.6	0.0667126	0.11797	0.24853	0.34612	0.66965	0.9579	1.23003	1.41244	1.65142
	86.8	0.0676147	0.11822	0.24819	0.34676	0.67138	0.95948	1.23126	1.41437	1.65521
	87	0.065057	0.11906	0.24934	0.34831	0.67229	0.96113	1.23275	1.41599	1.65644
	87.2	0.0645835	0.12029	0.24986	0.34826	0.67379	0.96189	1.23333	1.41716	1.65759
	87.4	0.0638015	0.12001	0.24961	0.34974	0.67585	0.96317	1.23511	1.41823	1.65909
	87.6	0.0650246	0.12055	0.24946	0.34993	0.67722	0.96388	1.2377	1.41969	1.661
	87.8	0.0642813	0.12149	0.25041	0.35059	0.67758	0.9651	1.23938	1.42107	1.66129
	88	0.0648062	0.12101	0.25052	0.35205	0.67895	0.96628	1.24102	1.42325	1.6626
	88.2	0.06472	0.11984	0.25035	0.35307	0.67861	0.96831	1.24352	1.42582	1.664
	88.4	0.0644699	0.12026	0.25231	0.35294	0.67935	0.96948	1.24462	1.42713	1.66599
	88.6	0.0643567	0.12079	0.25267	0.3541	0.67946	0.97165	1.24506	1.42845	1.66756
	88.8	0.0663623	0.12026	0.2529	0.35462	0.68115	0.97389	1.24841	1.43058	1.67041
	89	0.0670871	0.12086	0.25362	0.35373	0.68226	0.9748	1.25054	1.43282	1.67165
	89.2	0.0689328	0.1207	0.25457	0.35544	0.6843	0.97658	1.25313	1.43348	1.6726
	89.4	0.0694864	0.12146	0.25406	0.35632	0.68514	0.97807	1.25487	1.4368	1.67454
	89.6	0.0698681	0.12072	0.25617	0.35745	0.6876	0.9788	1.25686	1.4396	1.67512
	89.8	0.0691938	0.12127	0.25712	0.35717	0.68809	0.98082	1.25752	1.44126	1.6756
	90	0.0692322	0.12058	0.25699	0.35865	0.68934	0.98399	1.25783	1.44287	1.67911
	90.2	0.0673304	0.12108	0.2582	0.35784	0.69001	0.98476	1.2587	1.44631	1.68177
	90.4	0.0663269	0.12171	0.25868	0.35906	0.69187	0.98691	1.26086	1.44629	1.68376
	90.6	0.0658777	0.12399	0.25834	0.35931	0.69245	0.98826	1.26152	1.44756	1.68504
	90.8	0.0652978	0.1244	0.2589	0.36057	0.69336	0.98948	1.26391	1.44798	1.68675
	91	0.0672383	0.12474	0.25989	0.36043	0.69453	0.99045	1.26563	1.45015	1.68648
	91.2	0.0686372	0.12423	0.25883	0.36177	0.69598	0.99341	1.26725	1.44999	1.68856
	91.4	0.0687604	0.12294	0.25982	0.36218	0.69623	0.99459	1.2692	1.45206	1.68919
	91.6	0.0691916	0.12298	0.26015	0.36278	0.69681	0.99663	1.27088	1.4537	1.69224
	91.8	0.0694597	0.12372	0.26066	0.36225	0.69827	0.99713	1.27188	1.4564	1.69288
	92	0.0670869	0.12586	0.26059	0.36381	0.69893	0.99833	1.27324	1.45736	1.69582
	92.2	0.0673527	0.12653	0.26186	0.36446	0.6997	0.99924	1.27475	1.46081	1.69767
	92.4	0.0670412	0.1273	0.2617	0.36529	0.70054	1.00043	1.27588	1.46258	1.69978
	92.6	0.0671848	0.12592	0.26175	0.36561	0.70302	1.00248	1.27719	1.4646	1.70148
	92.8	0.0671085	0.1253	0.2616	0.3667	0.70413	1.00397	1.27911	1.46734	1.70428
	93	0.0680864	0.12487	0.26182	0.36646	0.70554	1.00442	1.28142	1.46912	1.70602
	93.2	0.0677309	0.12519	0.26163	0.36789	0.70634	1.00497	1.2828	1.46865	1.70604
	93.4	0.069147	0.12649	0.26266	0.36837	0.7073	1.00642	1.28535	1.46989	1.70789
	93.6	0.0694841	0.12666	0.26333	0.36933	0.7075	1.00688	1.28773	1.47086	1.70939
	93.8	0.0685403	0.12754	0.26392	0.37039	0.70816	1.00822	1.28969	1.47175	1.71186
	94	0.0692485	0.128	0.26511	0.37043	0.70856	1.00967	1.29197	1.47407	1.71287
	94.2	0.0692856	0.12918	0.26662	0.37028	0.71062	1.01184	1.29332	1.47635	1.71541
	94.4	0.0683404	0.12895	0.26803	0.37096	0.71286	1.01351	1.29364	1.47791	1.71622
	94.6	0.0670868	0.12991	0.26859	0.37079	0.71398	1.01544	1.29497	1.48102	1.71653
	94.8	0.068487	0.1289	0.26903	0.37036	0.71479	1.01807	1.29517	1.48276	1.7178
	95	0.0667298	0.12831	0.26956	0.37158	0.71656	1.02021	1.29543	1.48496	1.71881
	95.2	0.0654996	0.12786	0.26868	0.37193	0.71833	1.02194	1.29796	1.48653	1.72069
	95.4	0.0665158	0.12749	0.26811	0.37222	0.71835	1.02257	1.29913	1.4901	1.72331
	95.6	0.0677707	0.12791	0.26822	0.373	0.71971	1.02307	1.30253	1.49073	1.72477
	95.8	0.0666363	0.12848	0.26841	0.37455	0.72122	1.02394	1.30466	1.49282	1.72528
	96	0.0682403	0.12838	0.26795	0.37517	0.72147	1.02608	1.30579	1.49204	1.72675
	96.2	0.0678995	0.12944	0.26979	0.37609	0.72267	1.02668	1.30675	1.49501	1.7284
	96.4	0.0680645	0.13089	0.26962	0.37676	0.72341	1.02912	1.30842	1.49461	1.72968
	96.6	0.0691248	0.13044	0.26972	0.37723	0.72402	1.03115	1.30814	1.49622	1.73186
	96.8	0.0694369	0.13195	0.27049	0.37719	0.72538	1.03368	1.30925	1.49731	1.73294
	97	0.0689055	0.13266	0.27175	0.37769	0.72711	1.03418	1.31254	1.50022	1.73348
	97.2	0.0715928	0.13185	0.27069	0.3789	0.72714	1.03594	1.31373	1.50069	1.73422
	97.4	0.0714021	0.13173	0.27163	0.37972	0.72908	1.03615	1.31599	1.50257	1.73535
	97.6	0.0702917	0.13266	0.27322	0.38113	0.7301	1.03714	1.3175	1.50424	1.73719
	97.8	0.070414	0.13048	0.27374	0.38268	0.73106	1.03766	1.31845	1.5056	1.74033
	98	0.0721408	0.13135	0.27472	0.38377	0.73208	1.03913	1.32001	1.50702	1.74279
	98.2	0.072186	0.13078	0.27616	0.3833	0.73203	1.04139	1.32201	1.50895	1.74403
	98.4	0.0725854	0.1304	0.27636	0.38321	0.73295	1.044	1.32326	1.51054	1.74468
	98.6	0.0732575	0.13126	0.27638	0.38274	0.73422	1.04558	1.32426	1.51146	1.74654
	98.8	0.0742796	0.13318	0.27675	0.38312	0.73517	1.0476	1.32706	1.51211	1.74667
	99	0.0723077	0.13176	0.27655	0.38286	0.73695	1.04902	1.32835	1.51294	1.74822
	99.2	0.0728816	0.13325	0.27674	0.38419	0.73874	1.04981	1.32964	1.51405	1.75186
	99.4	0.0731905	0.13443	0.27707	0.3857	0.74008	1.04962	1.33086	1.51543	1.75372
	99.6	0.0729665	0.13327	0.27775	0.38754	0.74206	1.05163	1.33333	1.51764	1.7545
	99.8	0.0741732	0.13395	0.27823	0.38929	0.74356	1.053	1.33343	1.51991	1.75627
	100	0.0742934	0.1355	0.27899	0.3906	0.74302	1.05517	1.33444	1.52199	1.75812
	100.2	0.0746299	0.1352	0.27932	0.39099	0.74433	1.05684	1.33529	1.52346	1.75747
	100.4	0.0727804	0.1349	0.28085	0.39145	0.74445	1.05906	1.33743	1.5236	1.75843
	100.6	0.0731586	0.13504	0.28077	0.3911	0.74495	1.05993	1.33874	1.52345	1.75963
	100.8	0.0718505	0.13397	0.28005	0.38996	0.74589	1.06011	1.33985	1.52486	1.76134
	101	0.0726254	0.13449	0.27966	0.39094	0.74751	1.06113	1.34197	1.52698	1.76177
	101.2	0.071087	0.13634	0.27955	0.39119	0.74854	1.06201	1.34299	1.52772	1.76365
	101.4	0.0725447	0.1359	0.27887	0.39234	0.74924	1.06287	1.34329	1.53028	1.7652
	101.6	0.0723061	0.13702	0.27907	0.39257	0.74962	1.06493	1.34518	1.53203	1.76685
	101.8	0.0725732	0.13744	0.28102	0.39367	0.75009	1.06726	1.34631	1.53454	1.76746
	102	0.0720304	0.13673	0.28198	0.3939	0.75083	1.06823	1.34724	1.53572	1.76913
	102.2	0.0731866	0.13601	0.28314	0.39373	0.75147	1.06937	1.35003	1.53756	1.76985
	102.4	0.0735407	0.13659	0.28334	0.39434	0.75414	1.07091	1.3526	1.53942	1.77274
	102.6	0.073528	0.13634	0.28392	0.39497	0.75545	1.07245	1.35418	1.54184	1.77387
	102.8	0.0729194	0.13748	0.28343	0.39569	0.75637	1.07189	1.35667	1.54216	1.77658
	103	0.072714	0.13852	0.28384	0.39597	0.7573	1.07382	1.35721	1.54307	1.77732
	103.2	0.0723148	0.13828	0.28443	0.39698	0.75936	1.07527	1.35868	1.54413	1.77913
	103.4	0.0721892	0.14005	0.28527	0.39664	0.75982	1.07695	1.35921	1.54675	1.77969
	103.6	0.0714938	0.13972	0.28678	0.39759	0.76123	1.07813	1.36	1.54829	1.78125
	103.8	0.0713989	0.1395	0.28841	0.39781	0.76297	1.08	1.36263	1.55019	1.78237
	104	0.0724512	0.1393	0.28815	0.39873	0.76293	1.08121	1.36373	1.55185	1.7847
	104.2	0.0720628	0.13954	0.28898	0.39997	0.76353	1.08317	1.36425	1.55421	1.78619
	104.4	0.0721025	0.13903	0.28983	0.40052	0.7646	1.08421	1.36538	1.55472	1.7886
	104.6	0.0721674	0.14072	0.28951	0.40167	0.7652	1.08526	1.36658	1.55601	1.79015
	104.8	0.0721943	0.14152	0.28881	0.40317	0.76615	1.08714	1.3673	1.55777	1.79097
	105	0.0723079	0.14089	0.29037	0.40448	0.76852	1.0869	1.36851	1.55946	1.79244
	105.2	0.0714587	0.14103	0.28892	0.40433	0.76903	1.08803	1.37018	1.55989	1.79307
	105.4	0.07129	0.14092	0.28917	0.40587	0.77026	1.08953	1.37234	1.56143	1.79238
	105.6	0.0728578	0.14053	0.28929	0.40625	0.77055	1.09037	1.37567	1.56271	1.79354
	105.8	0.0723689	0.13945	0.28973	0.40688	0.77131	1.09193	1.37727	1.56448	1.79419
	106	0.0729822	0.14061	0.28948	0.40672	0.77288	1.09461	1.38047	1.56586	1.79482
	106.2	0.0739062	0.1415	0.29118	0.40811	0.7746	1.09433	1.38255	1.56774	1.79648
	106.4	0.0738714	0.14224	0.29182	0.40718	0.77479	1.09482	1.38288	1.56941	1.79933
	106.6	0.0731328	0.14317	0.29217	0.40789	0.77702	1.09527	1.38366	1.57035	1.8004
	106.8	0.0744607	0.14454	0.29227	0.40839	0.77675	1.09671	1.38441	1.57147	1.80095
	107	0.07228	0.14371	0.29304	0.40909	0.77792	1.09683	1.38566	1.57334	1.80331
	107.2	0.0720634	0.14339	0.29275	0.40951	0.77874	1.09988	1.38606	1.57467	1.80503
	107.4	0.0718942	0.14315	0.29273	0.41208	0.78102	1.10162	1.38753	1.57538	1.8055
	107.6	0.0722485	0.14178	0.29358	0.41221	0.78018	1.10352	1.38884	1.57692	1.8065
	107.8	0.0720371	0.14214	0.29494	0.41248	0.78228	1.10438	1.38981	1.5777	1.80848
	108	0.0727004	0.14345	0.29565	0.41181	0.78254	1.10624	1.3915	1.57818	1.80902
	108.2	0.073999	0.14237	0.29654	0.41283	0.78352	1.10593	1.39268	1.57977	1.81005
	108.4	0.073957	0.1433	0.29783	0.41251	0.7829	1.10761	1.39531	1.58204	1.81028
	108.6	0.0736226	0.14398	0.29871	0.41228	0.78542	1.10875	1.39586	1.58431	1.81277
	108.8	0.0733544	0.14346	0.29871	0.41171	0.78676	1.11058	1.39727	1.58615	1.81401
	109	0.0735966	0.14392	0.29863	0.41392	0.78866	1.11169	1.39785	1.58793	1.81526
	109.2	0.0722872	0.14559	0.29887	0.41325	0.78926	1.11433	1.39969	1.59085	1.81602
	109.4	0.0721699	0.14459	0.29933	0.41411	0.7905	1.11521	1.40083	1.59127	1.81789
	109.6	0.0720298	0.14485	0.2997	0.41561	0.79136	1.11684	1.40195	1.59323	1.81779
	109.8	0.0725026	0.14548	0.30008	0.41693	0.79206	1.11666	1.40352	1.59461	1.81988
	110	0.073006	0.14605	0.3005	0.41666	0.79312	1.11759	1.40434	1.59636	1.82157
	110.2	0.0734998	0.14637	0.30082	0.41785	0.79364	1.11822	1.4052	1.596	1.82332
	110.4	0.0740804	0.1478	0.30082	0.41841	0.79498	1.11959	1.4049	1.59715	1.82405
	110.6	0.0737124	0.14823	0.30095	0.41905	0.79536	1.12003	1.40605	1.59757	1.8262
	110.8	0.0733232	0.14739	0.30205	0.42062	0.79545	1.1226	1.40698	1.59983	1.82689
	111	0.0735338	0.14706	0.30281	0.42144	0.7959	1.12421	1.40777	1.6003	1.82776
	111.2	0.0728486	0.14679	0.30296	0.42314	0.79688	1.12468	1.40912	1.60153	1.8297
	111.4	0.0736929	0.1459	0.30462	0.42373	0.7983	1.12603	1.41275	1.60322	1.83202
	111.6	0.0748911	0.14662	0.30431	0.42284	0.79901	1.12749	1.4139	1.60492	1.83278
	111.8	0.0742973	0.14685	0.30566	0.42273	0.80079	1.12872	1.4165	1.60486	1.8343
	112	0.0740572	0.14828	0.30667	0.42324	0.80104	1.12967	1.41863	1.60633	1.83548
	112.2	0.0742245	0.14924	0.30686	0.42214	0.80219	1.13155	1.42097	1.60856	1.83556
	112.4	0.0731289	0.15066	0.3059	0.42213	0.80225	1.13191	1.42061	1.61064	1.83604
	112.6	0.0725936	0.15035	0.30727	0.42328	0.80394	1.13254	1.42268	1.61266	1.83855
	112.8	0.0736385	0.15052	0.30589	0.42348	0.80457	1.13288	1.42328	1.61409	1.84044
	113	0.0732114	0.14987	0.30569	0.42358	0.80633	1.1351	1.42486	1.6151	1.84167
	113.2	0.0744553	0.14934	0.3071	0.42365	0.80793	1.13687	1.42554	1.61677	1.8436
	113.4	0.0743142	0.14899	0.30817	0.42517	0.81054	1.13949	1.42767	1.61727	1.84588
	113.6	0.0748299	0.14964	0.30858	0.42627	0.81084	1.14052	1.42886	1.61691	1.84563
	113.8	0.0748847	0.14975	0.30922	0.42724	0.81194	1.14221	1.43017	1.61946	1.84731
	114	0.0759337	0.14968	0.30904	0.42792	0.81317	1.14233	1.43135	1.62012	1.84902
	114.2	0.0751571	0.14908	0.30944	0.42839	0.81301	1.14308	1.43272	1.62094	1.84983
	114.4	0.0754548	0.14925	0.30871	0.42815	0.81323	1.14347	1.43251	1.62247	1.8514
	114.6	0.0760474	0.15	0.30903	0.4278	0.81428	1.14524	1.43389	1.62587	1.8531
	114.8	0.076103	0.15096	0.30996	0.42872	0.81589	1.14695	1.43554	1.62691	1.85342
	115	0.0755672	0.15039	0.31108	0.42904	0.81574	1.14838	1.43709	1.63006	1.85502
	115.2	0.0758234	0.15127	0.31103	0.42967	0.81695	1.14908	1.43741	1.63121	1.85643
	115.4	0.0763184	0.15152	0.31215	0.43053	0.81665	1.1499	1.44051	1.63298	1.85578
	115.6	0.0748353	0.14972	0.31273	0.43135	0.81865	1.15104	1.44098	1.63295	1.85774
	115.8	0.0754303	0.14956	0.31191	0.43108	0.82026	1.15235	1.44192	1.63452	1.85978
	116	0.075273	0.1519	0.31284	0.43244	0.8216	1.1536	1.44162	1.63489	1.86018
	116.2	0.0746245	0.15078	0.31318	0.43458	0.82279	1.15508	1.44438	1.63681	1.86021
	116.4	0.0759365	0.15086	0.31306	0.43461	0.82494	1.15694	1.44512	1.63761	1.863
	116.6	0.0764621	0.15127	0.31333	0.43584	0.82511	1.15827	1.44666	1.6392	1.86295
	116.8	0.0760686	0.15184	0.31493	0.43646	0.82566	1.15786	1.44728	1.64051	1.86204
	117	0.0765814	0.15089	0.31543	0.43596	0.82663	1.15905	1.44993	1.64087	1.8629
	117.2	0.076856	0.15173	0.31613	0.43628	0.82876	1.16085	1.44959	1.64376	1.86584
	117.4	0.0767617	0.15106	0.31606	0.43701	0.82966	1.16168	1.45009	1.6436	1.86636
	117.6	0.0766852	0.15171	0.31673	0.43724	0.82918	1.16248	1.45116	1.64557	1.86955
	117.8	0.0779929	0.15125	0.3169	0.43827	0.82856	1.16461	1.45221	1.64695	1.87042
	118	0.0780848	0.15014	0.31688	0.43956	0.82963	1.16616	1.4531	1.64968	1.8715
	118.2	0.0788014	0.15078	0.31709	0.43928	0.82976	1.16732	1.45626	1.64868	1.87206
	118.4	0.07801	0.15322	0.31774	0.44014	0.8309	1.16829	1.45819	1.65279	1.87221
	118.6	0.0793581	0.15245	0.31821	0.44135	0.83344	1.17088	1.46012	1.65374	1.87136
	118.8	0.0772491	0.1534	0.31873	0.4418	0.83487	1.17248	1.46241	1.65427	1.87435
	119	0.0772828	0.15443	0.31886	0.44199	0.83523	1.17418	1.4633	1.65495	1.8741
	119.2	0.0766153	0.15505	0.31972	0.44266	0.83744	1.17437	1.46286	1.65722	1.87574
	119.4	0.0769527	0.15438	0.32075	0.44286	0.83818	1.17647	1.46343	1.65691	1.87739
	119.6	0.0761798	0.15616	0.32073	0.44296	0.83879	1.1771	1.46489	1.65738	1.87834
	119.8	0.0770972	0.15608	0.32086	0.44354	0.8396	1.17745	1.46588	1.65842	1.87901
	120	0.0769561	0.15726	0.32129	0.44454	0.84116	1.17802	1.46764	1.65948	1.88093
	120.2	0.0781783	0.15677	0.32201	0.44484	0.8408	1.1795	1.46959	1.6606	1.88096
	120.4	0.0761515	0.15595	0.32215	0.4458	0.84263	1.17937	1.47114	1.66027	1.88288
	120.6	0.0773569	0.15577	0.32314	0.446	0.84459	1.1806	1.47186	1.66128	1.88547
	120.8	0.0761203	0.15658	0.32337	0.44671	0.84584	1.18167	1.47246	1.66124	1.88536
	121	0.0767509	0.15582	0.32466	0.44665	0.84616	1.18223	1.47204	1.66315	1.88757
	121.2	0.0772956	0.15751	0.3244	0.44769	0.84704	1.18262	1.47324	1.66445	1.88854
	121.4	0.0789951	0.15753	0.3252	0.44747	0.84646	1.18457	1.4755	1.66614	1.88849
	121.6	0.0784359	0.15647	0.32499	0.44766	0.84607	1.18474	1.47614	1.66786	1.88874
	121.8	0.0794123	0.15598	0.32562	0.44782	0.84706	1.18558	1.47792	1.67056	1.8907
	122	0.0788359	0.15681	0.32554	0.44748	0.84873	1.18622	1.47896	1.67193	1.89165
	122.2	0.0778188	0.15664	0.32622	0.44816	0.85041	1.18762	1.48016	1.67311	1.89241
	122.4	0.0777898	0.15735	0.32646	0.44897	0.85056	1.18888	1.48008	1.67411	1.89399
	122.6	0.0778184	0.15751	0.32655	0.45041	0.85198	1.19145	1.48131	1.67518	1.89524
	122.8	0.0797875	0.1571	0.32661	0.4504	0.85333	1.19336	1.48218	1.6761	1.89775
	123	0.080293	0.15646	0.3265	0.45157	0.85318	1.19448	1.48496	1.67739	1.89872
	123.2	0.0791782	0.15545	0.32691	0.45205	0.85344	1.19602	1.48654	1.67734	1.9005
	123.4	0.0788356	0.15596	0.32656	0.45264	0.85445	1.19699	1.48772	1.67939	1.90195
	123.6	0.0793782	0.15516	0.32797	0.45215	0.85464	1.19639	1.48896	1.6804	1.90222
	123.8	0.0782657	0.1547	0.3292	0.45325	0.85588	1.19665	1.48905	1.6815	1.9018
	124	0.0788265	0.15516	0.33076	0.45445	0.85652	1.1977	1.48869	1.68204	1.90292
	124.2	0.0796313	0.15561	0.33176	0.45486	0.85619	1.19804	1.48831	1.68441	1.90487
	124.4	0.0797448	0.15623	0.33313	0.45572	0.85798	1.19848	1.48923	1.68616	1.9058
	124.6	0.0795416	0.15942	0.3333	0.45726	0.86044	1.20089	1.49027	1.68699	1.90703
	124.8	0.0803044	0.1598	0.33432	0.45818	0.86147	1.20282	1.49171	1.68852	1.90871
	125	0.0789483	0.15834	0.33299	0.45907	0.8627	1.20429	1.49331	1.69008	1.90913
	125.2	0.0790974	0.1587	0.33277	0.45971	0.86536	1.20664	1.49494	1.69018	1.90873
	125.4	0.0805302	0.15779	0.33263	0.46021	0.86634	1.20847	1.49745	1.69099	1.91052
	125.6	0.0784908	0.15658	0.33228	0.46045	0.86687	1.20931	1.49893	1.69204	1.91168
	125.8	0.0782904	0.1581	0.3322	0.45994	0.8671	1.20931	1.50013	1.69322	1.91331
	126	0.0784256	0.16038	0.3342	0.45913	0.8672	1.2103	1.50116	1.69465	1.91509
	126.2	0.078006	0.15999	0.33461	0.46035	0.86754	1.21033	1.50208	1.69719	1.91745
	126.4	0.0780865	0.15997	0.33609	0.4602	0.86798	1.21089	1.50244	1.6998	1.91728
	126.6	0.0789405	0.16097	0.33699	0.4608	0.86966	1.21184	1.50331	1.70128	1.91969
	126.8	0.079324	0.16051	0.33638	0.46208	0.87093	1.21301	1.50582	1.70164	1.92051
	127	0.0795238	0.1606	0.33551	0.46374	0.87234	1.21456	1.50638	1.70219	1.92086
	127.2	0.07984	0.1627	0.33653	0.46296	0.87391	1.2151	1.50803	1.70178	1.92115
	127.4	0.07887	0.16292	0.33459	0.46423	0.87377	1.21659	1.51009	1.70164	1.92233
	127.6	0.0790848	0.16349	0.3355	0.46539	0.87293	1.21624	1.51054	1.70224	1.92245
	127.8	0.0778593	0.16361	0.33634	0.46594	0.87319	1.21663	1.51116	1.70485	1.92343
	128	0.0793971	0.16368	0.33718	0.46602	0.87468	1.21744	1.51395	1.70627	1.92424
	128.2	0.0791499	0.16206	0.33669	0.46604	0.87527	1.21912	1.51425	1.70799	1.92564
	128.4	0.0788868	0.16332	0.33913	0.46648	0.87735	1.22035	1.51532	1.7097	1.92662
	128.6	0.0792238	0.16225	0.33857	0.46577	0.87797	1.22253	1.51598	1.71217	1.92806
	128.8	0.0794101	0.16278	0.33892	0.46574	0.87746	1.22483	1.51682	1.71233	1.92804
	129	0.0789079	0.16282	0.33887	0.46686	0.87794	1.22608	1.51771	1.71364	1.93055
	129.2	0.0804032	0.16438	0.33982	0.46881	0.87892	1.2265	1.52049	1.71426	1.93154
	129.4	0.0820102	0.16409	0.33963	0.46944	0.88019	1.22677	1.52043	1.71465	1.93216
	129.6	0.0813447	0.16458	0.34088	0.46979	0.88126	1.22855	1.52262	1.71593	1.93262
	129.8	0.0815824	0.16536	0.34086	0.47144	0.88334	1.22906	1.52334	1.71749	1.9348
	130	0.0808554	0.16517	0.34222	0.47184	0.88463	1.23071	1.52304	1.71737	1.93502
	130.2	0.0798632	0.16468	0.34286	0.47282	0.88438	1.23266	1.52303	1.72038	1.93652
	130.4	0.0777119	0.16458	0.34296	0.47363	0.88358	1.23441	1.52517	1.72179	1.93856
	130.6	0.0788638	0.1641	0.34292	0.47535	0.88522	1.23494	1.52536	1.72336	1.9401
	130.8	0.0787218	0.16402	0.3437	0.47456	0.88705	1.23557	1.52706	1.72404	1.94038
	131	0.080834	0.16403	0.34377	0.47432	0.88802	1.23565	1.52867	1.72552	1.94087
	131.2	0.0807037	0.1635	0.34279	0.47318	0.88951	1.23613	1.53012	1.72489	1.94158
	131.4	0.0819503	0.16278	0.3436	0.47348	0.89242	1.23582	1.52955	1.7256	1.94338
	131.6	0.0829173	0.1628	0.34423	0.47437	0.89234	1.23697	1.53141	1.72603	1.94386
	131.8	0.0831381	0.16257	0.34414	0.47506	0.89304	1.23817	1.53143	1.72655	1.94633
	132	0.0824751	0.16316	0.34423	0.47593	0.8932	1.23927	1.53262	1.72736	1.94832
	132.2	0.0839578	0.16324	0.34578	0.47705	0.89452	1.24051	1.53337	1.7288	1.95016
	132.4	0.0824629	0.16378	0.34637	0.47697	0.89479	1.24273	1.5359	1.73076	1.94985
	132.6	0.082195	0.16456	0.34646	0.47632	0.89652	1.24393	1.53738	1.73149	1.95067
	132.8	0.0813641	0.16443	0.34738	0.47651	0.8974	1.24521	1.53833	1.73278	1.94993
	133	0.0805408	0.16283	0.34889	0.4762	0.89802	1.24622	1.53951	1.73381	1.95091
	133.2	0.0810384	0.16312	0.34934	0.47723	0.89889	1.24786	1.53977	1.73547	1.95123
	133.4	0.0821402	0.1633	0.34914	0.47789	0.89896	1.24814	1.53992	1.73464	1.95272
	133.6	0.0823658	0.16272	0.34934	0.4777	0.89977	1.24762	1.5401	1.7359	1.95554
	133.8	0.0830644	0.1635	0.34841	0.47888	0.90011	1.24853	1.54154	1.73736	1.95657
	134	0.0830792	0.1648	0.34725	0.48103	0.90161	1.24926	1.54321	1.73988	1.95835
	134.2	0.0817274	0.16446	0.3477	0.48073	0.90156	1.24997	1.54526	1.74082	1.95886
	134.4	0.0812486	0.16455	0.34827	0.48046	0.90336	1.25114	1.54698	1.74333	1.95995
	134.6	0.0803289	0.16466	0.34891	0.48232	0.90381	1.25361	1.54904	1.7439	1.9595
	134.8	0.0819957	0.16387	0.34995	0.48274	0.90577	1.25456	1.54894	1.74499	1.96231
	135	0.0804646	0.16502	0.35112	0.48169	0.90613	1.25658	1.54869	1.74521	1.9617
	135.2	0.080349	0.16587	0.35099	0.48244	0.90691	1.2575	1.54895	1.7439	1.96255
	135.4	0.0806945	0.16694	0.35169	0.48338	0.90676	1.25809	1.54867	1.74486	1.96406
	135.6	0.0806029	0.16825	0.35261	0.48266	0.9077	1.25857	1.5502	1.74538	1.96468
	135.8	0.0799559	0.16893	0.35318	0.4834	0.90784	1.26007	1.55322	1.74624	1.96366
	136	0.0823212	0.16879	0.35346	0.48407	0.90876	1.2602	1.55385	1.74765	1.96582
	136.2	0.0834971	0.1692	0.35464	0.48436	0.90926	1.2609	1.55439	1.75046	1.96714
	136.4	0.0836438	0.16906	0.35433	0.48514	0.91065	1.26235	1.55653	1.7515	1.96654
	136.6	0.0844484	0.16941	0.35376	0.48667	0.9123	1.26416	1.55579	1.75342	1.96704
	136.8	0.0842271	0.16937	0.35441	0.48728	0.912	1.26409	1.55585	1.75348	1.96764
	137	0.0853362	0.16847	0.35481	0.48829	0.91245	1.26523	1.55799	1.75433	1.968
	137.2	0.0858596	0.16877	0.35387	0.48895	0.91443	1.26573	1.55976	1.75537	1.96854
	137.4	0.0862461	0.16964	0.35461	0.48942	0.91453	1.26721	1.55993	1.75586	1.9705
	137.6	0.0854146	0.16921	0.35607	0.48986	0.91396	1.26834	1.56172	1.75709	1.97154
	137.8	0.0855253	0.17077	0.35693	0.48963	0.91632	1.27076	1.56362	1.75793	1.97252
	138	0.0843276	0.17144	0.35742	0.49102	0.91799	1.27219	1.56527	1.75957	1.97384
	138.2	0.0848912	0.17275	0.35752	0.49116	0.91758	1.27328	1.56619	1.76096	1.97411
	138.4	0.0861925	0.17285	0.35845	0.49153	0.91871	1.27335	1.56825	1.76258	1.97579
	138.6	0.0870816	0.17239	0.3583	0.491	0.92008	1.27247	1.56945	1.76435	1.97716
	138.8	0.0865632	0.17142	0.35829	0.49144	0.9192	1.27192	1.57099	1.76737	1.97963
	139	0.0857324	0.17189	0.35836	0.49075	0.92023	1.27164	1.57126	1.76846	1.97941
	139.2	0.0839746	0.17064	0.35955	0.49212	0.92143	1.27322	1.57257	1.77016	1.98132
	139.4	0.0819674	0.17032	0.35915	0.49224	0.92255	1.27448	1.57209	1.77029	1.98157
	139.6	0.0822153	0.17097	0.35928	0.49322	0.92305	1.27598	1.57463	1.76976	1.98235
	139.8	0.0835096	0.1704	0.3601	0.49345	0.92472	1.27797	1.57416	1.77031	1.98246
	140	0.084439	0.17111	0.36087	0.49388	0.92509	1.27982	1.57439	1.77047	1.9849
	140.2	0.0848911	0.1707	0.36116	0.49346	0.92753	1.28135	1.57447	1.76989	1.98559
	140.4	0.0849846	0.17068	0.36243	0.49527	0.92828	1.2816	1.57597	1.7712	1.9859
	140.6	0.0853689	0.17113	0.36303	0.49457	0.92935	1.28306	1.57513	1.77344	1.98812
	140.8	0.0833419	0.17125	0.3622	0.49551	0.92974	1.28255	1.5765	1.77519	1.98866
	141	0.0828812	0.1696	0.36179	0.49589	0.93037	1.28369	1.57807	1.77628	1.98847
	141.2	0.0829614	0.17096	0.36192	0.4957	0.92956	1.28313	1.57971	1.77867	1.98965
	141.4	0.0829533	0.17061	0.36149	0.49518	0.93159	1.28568	1.58054	1.7795	1.98984
	141.6	0.0824862	0.17016	0.36134	0.49758	0.93124	1.28608	1.58044	1.77864	1.99005
	141.8	0.0833244	0.17132	0.36374	0.49788	0.93171	1.28728	1.58133	1.77827	1.99112
	142	0.0841704	0.17278	0.36467	0.49917	0.93353	1.28741	1.5825	1.78004	1.99201
	142.2	0.0842158	0.17196	0.36499	0.50044	0.93482	1.28836	1.58495	1.78058	1.99207
	142.4	0.0832658	0.17229	0.36535	0.50138	0.93468	1.28864	1.58635	1.78194	1.9948
	142.6	0.0830444	0.17265	0.36634	0.5009	0.93733	1.29026	1.58863	1.78466	1.99446
	142.8	0.082871	0.17178	0.3654	0.50181	0.93764	1.29142	1.58901	1.78662	1.9951
	143	0.0825872	0.17176	0.36497	0.50136	0.93698	1.2931	1.58874	1.78611	1.99721
	143.2	0.0827575	0.1719	0.36635	0.50184	0.93788	1.29465	1.58873	1.78641	1.99803
	143.4	0.0846775	0.17217	0.3667	0.50292	0.939	1.29549	1.59041	1.7879	1.99844
	143.6	0.0851811	0.17305	0.36678	0.50284	0.93918	1.29652	1.5918	1.78697	2.00022
	143.8	0.08541	0.17398	0.36636	0.50316	0.94126	1.29759	1.59449	1.78776	2.00132
	144	0.0852402	0.17394	0.36683	0.50402	0.94297	1.29872	1.59667	1.78968	2.00116
	144.2	0.0845434	0.1746	0.36645	0.50509	0.94308	1.29985	1.59827	1.79061	2.00227
	144.4	0.0840462	0.17481	0.36703	0.50419	0.94391	1.30088	1.59798	1.79187	2.00348
	144.6	0.0834765	0.17492	0.36754	0.50375	0.94519	1.30133	1.59728	1.79433	2.00453
	144.8	0.0842419	0.17507	0.369	0.50442	0.94475	1.30098	1.59777	1.79451	2.00478
	145	0.0842651	0.17551	0.37032	0.50586	0.94585	1.30114	1.59763	1.79636	2.00532
	145.2	0.0859727	0.17547	0.37035	0.50571	0.94715	1.30182	1.59726	1.79849	2.00764
	145.4	0.0866671	0.17623	0.37006	0.50672	0.94808	1.30198	1.5993	1.79785	2.00713
	145.6	0.0866444	0.17672	0.37118	0.50911	0.94854	1.30276	1.60182	1.79763	2.00767
	145.8	0.0864149	0.17616	0.37172	0.50903	0.95037	1.30605	1.60109	1.7993	2.0099
	146	0.0878138	0.17644	0.37175	0.50835	0.95069	1.30584	1.60409	1.79873	2.01049
	146.2	0.0862725	0.17642	0.37237	0.5093	0.95208	1.30682	1.60492	1.799	2.01032
	146.4	0.08545	0.1765	0.37285	0.51072	0.95238	1.30863	1.60442	1.80145	2.0126
	146.6	0.0857724	0.17596	0.37251	0.51195	0.95328	1.31043	1.60592	1.80331	2.01361
	146.8	0.0854816	0.17704	0.37309	0.51291	0.95396	1.30979	1.60745	1.80345	2.01322
	147	0.0849996	0.17632	0.37399	0.51416	0.95423	1.31179	1.60761	1.80568	2.01439
	147.2	0.0851096	0.17539	0.37479	0.51426	0.95432	1.31113	1.61073	1.80664	2.01542
	147.4	0.0851381	0.17512	0.37631	0.51438	0.95539	1.31261	1.61122	1.80643	2.01552
	147.6	0.0852969	0.17502	0.37776	0.51369	0.95535	1.31324	1.61092	1.8065	2.01723
	147.8	0.0852704	0.17467	0.3779	0.51449	0.9551	1.3142	1.61192	1.8078	2.01784
	148	0.0850086	0.17461	0.37785	0.51376	0.95623	1.3154	1.61267	1.80847	2.02002
	148.2	0.0854563	0.17642	0.37799	0.51418	0.95652	1.31769	1.6112	1.81007	2.0216
	148.4	0.0862997	0.17614	0.37815	0.51316	0.95571	1.31789	1.61278	1.81064	2.02301
	148.6	0.0863968	0.17453	0.37724	0.51378	0.95791	1.31881	1.61354	1.81312	2.02322
	148.8	0.0866988	0.17508	0.3775	0.5139	0.96001	1.32045	1.61531	1.81339	2.0263
	149	0.0860653	0.17567	0.37759	0.51453	0.96051	1.3211	1.61668	1.81343	2.02577
	149.2	0.0867275	0.17443	0.37864	0.51467	0.96048	1.32227	1.61792	1.81329	2.02585
	149.4	0.0866838	0.17483	0.37827	0.5158	0.96197	1.32296	1.61981	1.81496	2.02649
	149.6	0.0877284	0.17711	0.37835	0.51654	0.96205	1.32419	1.62172	1.81461	2.02803
	149.8	0.088118	0.17648	0.37875	0.51725	0.96225	1.32529	1.62191	1.81655	2.02741
	150	0.088633	0.17786	0.37943	0.51832	0.96453	1.32711	1.62311	1.81638	2.02915
	150.2	0.0873285	0.17852	0.37901	0.51811	0.96671	1.32731	1.62417	1.81799	2.03001
	150.4	0.0881703	0.17838	0.37979	0.51809	0.96815	1.32836	1.62428	1.81959	2.03027
	150.6	0.0865963	0.17672	0.38047	0.51817	0.9686	1.32807	1.62432	1.82119	2.02966
	150.8	0.0867523	0.17726	0.38209	0.51819	0.96892	1.32852	1.62689	1.82024	2.0309
	151	0.0866117	0.17771	0.38176	0.51938	0.96929	1.3278	1.62758	1.8222	2.03139
	151.2	0.087702	0.17821	0.3825	0.52011	0.97056	1.32907	1.62916	1.82252	2.0323
	151.4	0.0865802	0.17918	0.38399	0.52193	0.97061	1.32974	1.62977	1.82424	2.03326
	151.6	0.0867648	0.17991	0.38397	0.52195	0.9717	1.33183	1.63067	1.82412	2.03409
	151.8	0.0866599	0.18024	0.38414	0.52319	0.97296	1.33312	1.6306	1.82741	2.03492
	152	0.0850685	0.17907	0.38477	0.52226	0.9723	1.33519	1.63151	1.82832	2.03671
	152.2	0.0834083	0.17831	0.38468	0.5232	0.97298	1.33671	1.6321	1.82925	2.03751
	152.4	0.0836713	0.1777	0.38374	0.52246	0.97408	1.33768	1.63358	1.82865	2.03874
	152.6	0.0838631	0.17872	0.38444	0.52301	0.9741	1.33818	1.63491	1.83105	2.04042
	152.8	0.08369	0.18016	0.38341	0.52339	0.97495	1.33868	1.63641	1.82963	2.04111
	153	0.0845464	0.1799	0.38367	0.5244	0.97542	1.33978	1.63667	1.8311	2.04135
	153.2	0.0850223	0.17991	0.384	0.52439	0.97532	1.34014	1.63817	1.83198	2.04135
	153.4	0.084867	0.18107	0.38464	0.5255	0.97701	1.34129	1.63865	1.83318	2.04277
	153.6	0.0855176	0.18071	0.38467	0.52626	0.97783	1.34183	1.64073	1.83412	2.04221
	153.8	0.085864	0.17874	0.38551	0.52609	0.97855	1.34239	1.64126	1.83541	2.04322
	154	0.0875231	0.17867	0.38623	0.5269	0.98026	1.34341	1.64283	1.83572	2.0436
	154.2	0.0891497	0.17963	0.38687	0.52776	0.9819	1.34422	1.64222	1.83639	2.04429
	154.4	0.0886768	0.17904	0.38784	0.52861	0.98171	1.34412	1.64351	1.83709	2.0453
	154.6	0.0884283	0.18028	0.38806	0.53017	0.98346	1.34598	1.64306	1.8383	2.0477
	154.8	0.0884612	0.18121	0.38842	0.53046	0.98456	1.34698	1.64549	1.83981	2.04912
	155	0.0879348	0.18182	0.3893	0.53073	0.9849	1.34792	1.64668	1.84153	2.04929
	155.2	0.0863129	0.18214	0.38947	0.53092	0.98554	1.3479	1.64778	1.84359	2.05141
	155.4	0.0877861	0.18283	0.38978	0.53026	0.98647	1.34938	1.64828	1.84522	2.0514
	155.6	0.0879083	0.18195	0.39072	0.52817	0.98638	1.34938	1.64925	1.84468	2.05142
	155.8	0.0866675	0.18234	0.39159	0.52906	0.98672	1.35045	1.64749	1.84601	2.05171
	156	0.086552	0.18275	0.39192	0.52944	0.98837	1.35064	1.64854	1.84604	2.05291
	156.2	0.0879277	0.18283	0.3927	0.53016	0.98936	1.35203	1.65052	1.84654	2.05264
	156.4	0.0878938	0.18324	0.39337	0.53127	0.98971	1.35295	1.65184	1.84711	2.05354
	156.6	0.0867635	0.18381	0.39375	0.53209	0.98983	1.35461	1.65307	1.84919	2.05349
	156.8	0.0885151	0.18389	0.39354	0.5323	0.99065	1.35613	1.6549	1.84861	2.05384
	157	0.0876679	0.18362	0.39439	0.53246	0.99031	1.35733	1.65386	1.84979	2.05623
	157.2	0.0880164	0.18372	0.39479	0.53215	0.99015	1.35823	1.65379	1.84969	2.05733
	157.4	0.0889648	0.18393	0.39357	0.53349	0.99182	1.35916	1.6555	1.84966	2.05863
	157.6	0.088621	0.18359	0.39444	0.53457	0.99291	1.35903	1.6555	1.84868	2.06015
	157.8	0.0881796	0.18402	0.3946	0.53534	0.99416	1.35911	1.65625	1.85063	2.06111
	158	0.0890388	0.18339	0.39373	0.5364	0.9969	1.35992	1.65712	1.85096	2.06015
	158.2	0.0882435	0.18395	0.39442	0.53801	0.99733	1.36088	1.6586	1.85299	2.0621
	158.4	0.0876812	0.1836	0.39464	0.5384	0.997	1.36211	1.65727	1.85364	2.06113
	158.6	0.0893675	0.18456	0.39323	0.53987	0.99783	1.36331	1.65907	1.85642	2.0622
	158.8	0.0905244	0.1841	0.39426	0.53958	0.99753	1.36491	1.65952	1.85782	2.06284
	159	0.091323	0.18451	0.39515	0.53985	0.99676	1.36531	1.66094	1.86056	2.06367
	159.2	0.0910985	0.18439	0.39462	0.54019	0.99918	1.36584	1.66181	1.86036	2.06284
	159.4	0.0919678	0.18446	0.39547	0.54062	1.00072	1.36594	1.66544	1.86104	2.06341
	159.6	0.0918899	0.18404	0.39709	0.54012	1.00241	1.36656	1.66512	1.86073	2.06375
	159.8	0.0903713	0.18442	0.39653	0.53979	1.0042	1.36655	1.66714	1.8603	2.06487
	160	0.0897559	0.18629	0.39618	0.54048	1.00531	1.36784	1.66759	1.8595	2.06534
	160.2	0.089401	0.18521	0.39715	0.54125	1.00444	1.36941	1.66846	1.85949	2.06671
	160.4	0.0885842	0.18574	0.39797	0.54013	1.00478	1.37118	1.66763	1.86113	2.06924
	160.6	0.0894449	0.18569	0.39738	0.5407	1.00551	1.37117	1.66947	1.86151	2.07068
	160.8	0.0891832	0.18561	0.39883	0.54128	1.00575	1.3709	1.66926	1.86255	2.07084
	161	0.0882571	0.18478	0.40007	0.54175	1.00594	1.37273	1.67051	1.86467	2.07204
	161.2	0.0898838	0.18531	0.40051	0.54141	1.00739	1.37229	1.67044	1.86535	2.07188
	161.4	0.0897541	0.18493	0.40077	0.54291	1.0082	1.37257	1.67203	1.86615	2.07212
	161.6	0.0891257	0.18591	0.401	0.54384	1.00793	1.37501	1.67084	1.86748	2.07112
	161.8	0.0908853	0.18618	0.4009	0.54553	1.00765	1.3784	1.67209	1.86989	2.07268
	162	0.0910887	0.18675	0.40038	0.54619	1.00956	1.37778	1.67407	1.86963	2.07292
	162.2	0.0905555	0.18806	0.40041	0.54677	1.01007	1.37953	1.67474	1.87184	2.07427
	162.4	0.0912075	0.18896	0.39984	0.54784	1.01003	1.37983	1.67459	1.87436	2.07525
	162.6	0.0914903	0.189	0.40118	0.5484	1.0105	1.38007	1.67776	1.87446	2.07682
	162.8	0.0907013	0.1907	0.40148	0.54796	1.01165	1.37927	1.67712	1.87379	2.07765
	163	0.0907813	0.18874	0.40178	0.54808	1.0111	1.38089	1.67685	1.87571	2.07937
	163.2	0.0906165	0.18931	0.40234	0.5498	1.01128	1.38134	1.67832	1.87797	2.08066
	163.4	0.0898352	0.18899	0.40426	0.54895	1.01169	1.3827	1.67914	1.87629	2.08155
	163.6	0.0897665	0.18831	0.40389	0.54869	1.01253	1.38329	1.67913	1.87844	2.08345
	163.8	0.0901569	0.1872	0.40413	0.54972	1.01351	1.38381	1.68156	1.87995	2.08352
	164	0.0903931	0.18936	0.40465	0.55002	1.0143	1.38427	1.68357	1.87882	2.0842
	164.2	0.0906676	0.18823	0.4052	0.54856	1.0153	1.38506	1.68421	1.87866	2.08506
	164.4	0.0913012	0.1887	0.40394	0.54978	1.01639	1.38489	1.68577	1.8801	2.0865
	164.6	0.0910116	0.19037	0.40474	0.55051	1.01764	1.38562	1.68649	1.87993	2.08669
	164.8	0.0903883	0.1914	0.40483	0.55119	1.0179	1.38732	1.68795	1.88139	2.08832
	165	0.0912161	0.19209	0.4055	0.55129	1.01827	1.38803	1.68727	1.88472	2.08876
	165.2	0.0922754	0.19304	0.40489	0.55271	1.01956	1.38913	1.68923	1.88367	2.08905
	165.4	0.091893	0.19366	0.40574	0.55266	1.02062	1.38991	1.68976	1.8857	2.08962
	165.6	0.0922436	0.19388	0.40615	0.55336	1.02034	1.39063	1.68943	1.88726	2.08972
	165.8	0.0928915	0.19402	0.40625	0.55341	1.02157	1.39087	1.68849	1.88658	2.08905
	166	0.0933355	0.19335	0.40632	0.55413	1.02238	1.39187	1.68919	1.88645	2.09035
	166.2	0.0920661	0.19464	0.40824	0.55439	1.0218	1.39271	1.68933	1.88775	2.0909
	166.4	0.0921134	0.19449	0.40848	0.55441	1.0233	1.3943	1.69047	1.88719	2.09162
	166.6	0.0926585	0.19408	0.40919	0.55546	1.02425	1.39488	1.69247	1.8882	2.09166
	166.8	0.0933875	0.1937	0.41044	0.55699	1.02437	1.39572	1.6939	1.89065	2.09294
	167	0.0919649	0.19439	0.41081	0.55761	1.02435	1.39637	1.69524	1.89078	2.09252
	167.2	0.0919899	0.19421	0.41063	0.55727	1.02618	1.39765	1.69623	1.89253	2.09293
	167.4	0.092731	0.19455	0.41152	0.55852	1.0264	1.39802	1.69696	1.89422	2.09325
	167.6	0.0916491	0.19492	0.41027	0.55904	1.02759	1.39924	1.69727	1.89421	2.09467
	167.8	0.0899074	0.19484	0.41064	0.55855	1.02807	1.39955	1.69862	1.89316	2.09624
	168	0.0900555	0.19488	0.41058	0.55897	1.03012	1.40027	1.69997	1.89552	2.09694
	168.2	0.0913077	0.19417	0.41085	0.56022	1.03052	1.40059	1.70088	1.89743	2.09727
	168.4	0.0893071	0.19469	0.41113	0.56084	1.03075	1.40126	1.70219	1.89796	2.09717
	168.6	0.0895231	0.19417	0.4128	0.55914	1.03059	1.40122	1.70272	1.89886	2.09821
	168.8	0.0908166	0.19313	0.41269	0.55974	1.0321	1.40298	1.70274	1.90049	2.09849
	169	0.0913947	0.19298	0.41363	0.5602	1.03244	1.40365	1.70321	1.9004	2.10006
	169.2	0.0922229	0.1926	0.41461	0.55994	1.03311	1.40456	1.70313	1.89946	2.1015
	169.4	0.0940505	0.19214	0.41495	0.56004	1.03359	1.40497	1.70346	1.90201	2.10304
	169.6	0.0939885	0.19109	0.41445	0.56151	1.03603	1.40591	1.70555	1.90228	2.1035
	169.8	0.0942315	0.1928	0.4159	0.56202	1.03664	1.40602	1.70645	1.90334	2.1038
	170	0.0943635	0.19331	0.41634	0.56159	1.03801	1.40644	1.70612	1.90476	2.10384
	170.2	0.0927995	0.19334	0.4147	0.5622	1.03885	1.4067	1.70717	1.90532	2.10536
	170.4	0.0918329	0.19372	0.41571	0.56364	1.04022	1.40832	1.70842	1.90499	2.10381
	170.6	0.0914719	0.19578	0.41655	0.56477	1.0398	1.40931	1.70807	1.9061	2.10607
	170.8	0.0919418	0.1953	0.4157	0.56531	1.0411	1.40984	1.70769	1.90766	2.10723
	171	0.0912239	0.19528	0.41581	0.56591	1.04172	1.41081	1.71049	1.90865	2.10948
	171.2	0.0907025	0.19581	0.41629	0.56679	1.04169	1.41131	1.71197	1.90873	2.1089
	171.4	0.0921624	0.19623	0.41589	0.56744	1.04308	1.4119	1.71216	1.90925	2.11216
	171.6	0.0926016	0.19629	0.41708	0.56724	1.0428	1.41141	1.71362	1.9098	2.11225
	171.8	0.091526	0.19769	0.41735	0.56695	1.04309	1.41267	1.71674	1.91041	2.11272
	172	0.0929205	0.19854	0.41805	0.56755	1.04323	1.41357	1.71654	1.90886	2.11176
	172.2	0.0933015	0.19841	0.41874	0.56807	1.04447	1.41355	1.71687	1.91126	2.11384
	172.4	0.0920555	0.1976	0.41951	0.56763	1.04488	1.41304	1.71773	1.91191	2.11331
	172.6	0.0928485	0.19762	0.41941	0.56783	1.04684	1.41486	1.71814	1.91384	2.11326
	172.8	0.0933095	0.19743	0.42035	0.56847	1.04769	1.41427	1.7176	1.91476	2.11406
	173	0.0925026	0.19551	0.42032	0.56978	1.04879	1.41493	1.71758	1.91571	2.11485
	173.2	0.0926158	0.19747	0.42127	0.56967	1.04885	1.41498	1.71832	1.91582	2.11518
	173.4	0.0923753	0.1974	0.42021	0.57003	1.04745	1.41641	1.71891	1.91684	2.1159
	173.6	0.0920632	0.19733	0.41936	0.57072	1.0466	1.41626	1.71964	1.9173	2.11606
	173.8	0.0919355	0.19752	0.41915	0.57179	1.04648	1.41797	1.72102	1.91729	2.11641
	174	0.0931405	0.1988	0.41902	0.57091	1.04693	1.41922	1.7218	1.91845	2.11756
	174.2	0.0936875	0.19783	0.41967	0.57201	1.04735	1.42232	1.72235	1.91922	2.11709
	174.4	0.0959555	0.19897	0.42141	0.57129	1.04929	1.42366	1.72257	1.92113	2.11829
	174.6	0.0953755	0.19943	0.42368	0.5725	1.0506	1.42549	1.72303	1.92114	2.11864
	174.8	0.0957025	0.19933	0.42398	0.57161	1.05076	1.42642	1.7243	1.92418	2.11972
	175	0.0946465	0.19938	0.42419	0.57272	1.0518	1.42677	1.72554	1.92486	2.12032
	175.2	0.0952145	0.2001	0.42435	0.57125	1.05235	1.42649	1.72609	1.92582	2.12193
	175.4	0.0940985	0.20074	0.42484	0.57208	1.05162	1.42743	1.72826	1.92428	2.12202
	175.6	0.0955365	0.20116	0.42371	0.57164	1.05245	1.42833	1.72988	1.92497	2.1229
	175.8	0.0951285	0.20067	0.4241	0.57312	1.05416	1.42835	1.72968	1.92417	2.12362
	176	0.0950085	0.20145	0.42581	0.57325	1.05415	1.42955	1.73036	1.92607	2.12461
	176.2	0.0939745	0.19998	0.42594	0.57533	1.05511	1.43054	1.73175	1.92809	2.12477
	176.4	0.0951085	0.19922	0.42606	0.57657	1.05654	1.43157	1.73128	1.92913	2.12523
	176.6	0.0939355	0.19917	0.42711	0.5769	1.05709	1.4318	1.73115	1.93085	2.12679
	176.8	0.0939315	0.1994	0.42793	0.57633	1.05679	1.43323	1.73237	1.93154	2.12692
	177	0.0951045	0.19863	0.42697	0.57716	1.05733	1.43434	1.73299	1.9313	2.12635
	177.2	0.0942025	0.20061	0.42668	0.57781	1.05894	1.43402	1.73293	1.93134	2.1274
	177.4	0.0935035	0.20034	0.42679	0.57734	1.06002	1.434	1.73445	1.93227	2.12871
	177.6	0.0933515	0.20131	0.4266	0.57752	1.06188	1.43549	1.7351	1.9322	2.13051
	177.8	0.0940825	0.20138	0.42683	0.57918	1.06279	1.4355	1.73572	1.93288	2.13162
	178	0.0928725	0.20204	0.42747	0.57984	1.06398	1.43574	1.73776	1.93332	2.13357
	178.2	0.0933995	0.20247	0.42902	0.57989	1.064	1.43738	1.73887	1.9339	2.13427
	178.4	0.0942685	0.20387	0.42923	0.58088	1.06437	1.43876	1.73991	1.93399	2.13514
	178.6	0.0955435	0.20161	0.42927	0.58176	1.06376	1.4387	1.74122	1.93558	2.13406
	178.8	0.0952515	0.20182	0.42933	0.58242	1.06531	1.4409	1.74144	1.936	2.13394
	179	0.0961815	0.20201	0.42933	0.58218	1.06557	1.44036	1.73984	1.93726	2.13376
	179.2	0.0965695	0.20054	0.43002	0.58176	1.0656	1.44122	1.74089	1.93898	2.13443
	179.4	0.0959995	0.19923	0.42983	0.58214	1.06747	1.44118	1.7416	1.94006	2.13497
	179.6	0.0964845	0.20064	0.43179	0.58289	1.06801	1.44137	1.74133	1.94077	2.13541
	179.8	0.0962995	0.20022	0.43198	0.58288	1.06813	1.44121	1.7431	1.94162	2.13687
	180	0.0952975	0.20047	0.43234	0.58279	1.06938	1.44189	1.74534	1.94228	2.13775
	180.2	0.0967625	0.19981	0.43144	0.58387	1.07201	1.44241	1.7449	1.94048	2.13828
	180.4	0.0961045	0.19961	0.43289	0.58413	1.07165	1.44345	1.74401	1.94193	2.13825
	180.6	0.0944815	0.19879	0.43213	0.58354	1.07327	1.44446	1.74595	1.94247	2.13883
	180.8	0.0951325	0.20077	0.43275	0.58404	1.07329	1.44541	1.74611	1.94362	2.13948
	181	0.0952075	0.19999	0.43394	0.58541	1.07283	1.44736	1.74606	1.94468	2.1389
	181.2	0.0939175	0.202	0.43464	0.58605	1.07194	1.44785	1.74816	1.94744	2.13969
	181.4	0.0939865	0.20287	0.43451	0.58709	1.07302	1.44792	1.74925	1.948	2.14017
	181.6	0.0953835	0.20281	0.43482	0.58872	1.07352	1.44868	1.74991	1.94885	2.14152
	181.8	0.0944485	0.20277	0.43518	0.58739	1.0749	1.45008	1.7511	1.94784	2.14338
	182	0.0958475	0.2042	0.43437	0.58692	1.07538	1.45108	1.75198	1.94794	2.14529
	182.2	0.0975925	0.20361	0.43428	0.58698	1.07541	1.45219	1.75246	1.94795	2.14625
	182.4	0.0976765	0.20405	0.43457	0.58611	1.07524	1.45356	1.75407	1.94917	2.14775
	182.6	0.0971675	0.20572	0.43423	0.58727	1.07545	1.45437	1.75397	1.95058	2.14915
	182.8	0.0974675	0.20494	0.43425	0.58948	1.07546	1.45534	1.75432	1.95234	2.14918
	183	0.0967315	0.20438	0.43486	0.58943	1.07597	1.45484	1.7565	1.95333	2.1504
	183.2	0.0946015	0.20471	0.4356	0.59035	1.07771	1.45621	1.75774	1.95467	2.14996
	183.4	0.0947515	0.20453	0.43573	0.59189	1.07947	1.45712	1.7586	1.9541	2.15055
	183.6	0.0942155	0.20492	0.43691	0.58918	1.07975	1.4577	1.759	1.95374	2.15087
	183.8	0.0940765	0.20431	0.43787	0.58885	1.08057	1.45637	1.75962	1.95413	2.15088
	184	0.0940075	0.20442	0.43768	0.58895	1.08245	1.45673	1.75957	1.95421	2.15195
	184.2	0.0939205	0.20443	0.43817	0.58888	1.08315	1.4562	1.75962	1.95406	2.15404
	184.4	0.0933375	0.20364	0.43883	0.58867	1.08257	1.45661	1.7603	1.95438	2.15425
	184.6	0.0941675	0.20298	0.43872	0.59065	1.08406	1.45699	1.76218	1.95484	2.15356
	184.8	0.0947565	0.20422	0.43866	0.5918	1.08704	1.45839	1.76192	1.95763	2.15396
	185	0.0946855	0.2036	0.43954	0.59367	1.08638	1.46011	1.76246	1.95753	2.15413
	185.2	0.0955845	0.20488	0.44016	0.59441	1.08645	1.46064	1.76356	1.95851	2.15456
	185.4	0.0954925	0.20466	0.44038	0.59444	1.08747	1.46189	1.76446	1.95943	2.15563
	185.6	0.0948445	0.20592	0.44141	0.59433	1.08743	1.46261	1.76421	1.96075	2.15558
	185.8	0.0943135	0.20536	0.44249	0.59546	1.08655	1.46335	1.76651	1.9596	2.15567
	186	0.0959635	0.20578	0.4426	0.59468	1.08789	1.46341	1.76725	1.96234	2.15653
	186.2	0.0947435	0.20397	0.44208	0.59477	1.08784	1.46501	1.76762	1.96259	2.15597
	186.4	0.0945495	0.20391	0.44215	0.59571	1.08885	1.46518	1.76723	1.9633	2.15602
	186.6	0.0953675	0.20288	0.44205	0.59666	1.08825	1.46609	1.77024	1.96411	2.1581
	186.8	0.0946495	0.20321	0.44195	0.59523	1.08809	1.46647	1.76926	1.96483	2.15777
	187	0.0939485	0.20271	0.44284	0.59641	1.08883	1.4664	1.76991	1.9659	2.15707
	187.2	0.0948935	0.20258	0.44258	0.5973	1.09074	1.46655	1.7718	1.96679	2.15765
	187.4	0.0954095	0.20399	0.44303	0.59658	1.09112	1.46798	1.77185	1.96836	2.15828
	187.6	0.0950185	0.20286	0.44307	0.59687	1.09361	1.46883	1.77106	1.9677	2.16005
	187.8	0.0967355	0.20255	0.44241	0.59887	1.09474	1.47032	1.77225	1.96858	2.16234
	188	0.0956605	0.20352	0.44319	0.59891	1.09497	1.47179	1.77249	1.96731	2.16307
	188.2	0.0962785	0.20472	0.4438	0.59961	1.09489	1.47294	1.77317	1.96756	2.16374
	188.4	0.0964155	0.20439	0.44395	0.6011	1.09522	1.47259	1.77457	1.96851	2.16458
	188.6	0.0972365	0.2056	0.44403	0.6006	1.09631	1.47314	1.77519	1.97024	2.16441
	188.8	0.0976425	0.20646	0.44541	0.60131	1.09655	1.47378	1.77515	1.97108	2.16552
	189	0.0980215	0.20624	0.4453	0.60101	1.09716	1.47443	1.77669	1.97349	2.167
	189.2	0.0975815	0.20638	0.44651	0.60048	1.09774	1.47459	1.77565	1.97327	2.16799
	189.4	0.0978495	0.20731	0.4471	0.60116	1.09938	1.47535	1.77571	1.97396	2.16863
	189.6	0.0973285	0.2057	0.44824	0.60228	1.09848	1.47467	1.77674	1.97415	2.16953
	189.8	0.0970775	0.20535	0.4471	0.60203	1.09885	1.4744	1.77873	1.9745	2.16981
	190	0.0981605	0.20582	0.44829	0.60343	1.09938	1.47487	1.77874	1.97528	2.17024
	190.2	0.0988725	0.20762	0.44833	0.60411	1.09937	1.47589	1.779	1.97771	2.17025
	190.4	0.0995985	0.20701	0.44759	0.60453	1.09973	1.47694	1.78119	1.9791	2.17158
	190.6	0.0992645	0.20924	0.44764	0.60521	1.10105	1.47835	1.78095	1.98053	2.1716
	190.8	0.0984105	0.20932	0.4496	0.60562	1.10182	1.47994	1.78231	1.98285	2.17188
	191	0.0982335	0.20958	0.44954	0.60622	1.10252	1.48107	1.78206	1.98305	2.17144
	191.2	0.0973795	0.20786	0.4499	0.60621	1.10275	1.48132	1.78476	1.98177	2.17202
	191.4	0.0967295	0.20974	0.45067	0.60572	1.10246	1.48096	1.78467	1.9821	2.17164
	191.6	0.0971625	0.2093	0.45054	0.60615	1.10346	1.48304	1.78421	1.98214	2.17314
	191.8	0.0969835	0.20996	0.45007	0.60582	1.10403	1.48383	1.7847	1.98076	2.17322
	192	0.0968555	0.20962	0.44946	0.60484	1.10373	1.48392	1.78592	1.98127	2.17504
	192.2	0.0970025	0.20992	0.45005	0.60555	1.10618	1.48427	1.78491	1.98312	2.17547
	192.4	0.0976885	0.20875	0.45069	0.60696	1.10634	1.48651	1.78549	1.98315	2.17653
	192.6	0.0982075	0.2091	0.45042	0.60684	1.10582	1.48693	1.7878	1.98228	2.17633
	192.8	0.0984425	0.20857	0.45118	0.60775	1.10682	1.48719	1.78629	1.98431	2.17653
	193	0.0976255	0.20961	0.45104	0.60914	1.10851	1.48785	1.78834	1.98454	2.1763
	193.2	0.0968895	0.20919	0.45121	0.61006	1.10906	1.48958	1.78942	1.98585	2.17698
	193.4	0.0964095	0.20903	0.45218	0.60989	1.11046	1.48936	1.79042	1.98611	2.17705
	193.6	0.0962275	0.20918	0.45336	0.61019	1.11192	1.48951	1.79132	1.98777	2.17828
	193.8	0.0966735	0.21062	0.4536	0.61001	1.11137	1.48993	1.7938	1.98689	2.17887
	194	0.0985735	0.21031	0.45485	0.61046	1.1116	1.49087	1.7932	1.98623	2.17999
	194.2	0.0988505	0.21053	0.45418	0.61017	1.11166	1.49072	1.79381	1.9857	2.17986
	194.4	0.101278	0.20932	0.45445	0.61084	1.11201	1.49099	1.79422	1.98632	2.17945
	194.6	0.10005	0.21117	0.4548	0.61192	1.11239	1.49125	1.79431	1.98605	2.18001
	194.8	0.0998785	0.21101	0.45451	0.61163	1.11433	1.49236	1.79494	1.98724	2.18334
	195	0.0990675	0.21132	0.45423	0.61141	1.11563	1.49236	1.79691	1.98853	2.18405
	195.2	0.100958	0.21231	0.4557	0.61147	1.11529	1.49275	1.79743	1.99044	2.18551
	195.4	0.0990305	0.21292	0.45599	0.61127	1.11598	1.49514	1.79881	1.99109	2.18699
	195.6	0.0992105	0.21121	0.45564	0.6116	1.11639	1.49671	1.79886	1.99322	2.18629
	195.8	0.0997705	0.21013	0.456	0.61218	1.11643	1.49709	1.79864	1.99448	2.18414
	196	0.100739	0.21096	0.45556	0.61226	1.11674	1.49858	1.79784	1.99634	2.18475
	196.2	0.0995515	0.21099	0.45481	0.61343	1.11834	1.49973	1.79874	1.99575	2.18604
	196.4	0.100272	0.21185	0.45453	0.61368	1.11898	1.49876	1.79904	1.99804	2.1861
	196.6	0.100234	0.21176	0.45654	0.61374	1.12008	1.49864	1.79988	1.99818	2.18768
	196.8	0.0993655	0.21229	0.45599	0.61303	1.12011	1.50021	1.8002	1.9989	2.18884
	197	0.0981945	0.21254	0.45754	0.61481	1.11994	1.50169	1.80153	1.99918	2.18838
	197.2	0.0981425	0.21255	0.45924	0.61552	1.11933	1.502	1.80222	2.0018	2.18981
	197.4	0.0978045	0.2141	0.45993	0.61562	1.12013	1.50293	1.8014	2.00141	2.19176
	197.6	0.0999235	0.21472	0.45862	0.61605	1.12054	1.50315	1.80273	2.00218	2.19217
	197.8	0.0989025	0.21443	0.46101	0.618	1.12062	1.50394	1.80446	2.00241	2.19318
	198	0.0986905	0.21348	0.46116	0.61721	1.12177	1.50389	1.80483	2.00229	2.1939
	198.2	0.0999065	0.21286	0.4607	0.61683	1.12339	1.50432	1.80577	2.00269	2.19343
	198.4	0.0996205	0.21309	0.46034	0.61835	1.12427	1.50534	1.80865	2.00336	2.19354
	198.6	0.0991715	0.21343	0.46065	0.61694	1.12467	1.5063	1.80849	2.00395	2.19413
	198.8	0.100651	0.21541	0.45922	0.61818	1.12558	1.50621	1.80812	2.00361	2.1953
	199	0.100859	0.21612	0.45835	0.62013	1.12554	1.5068	1.80932	2.00529	2.19507
	199.2	0.0994675	0.21685	0.45894	0.61993	1.12613	1.50759	1.80936	2.00412	2.19539
	199.4	0.100683	0.21469	0.46002	0.62064	1.12629	1.50826	1.80812	2.00457	2.19544
	199.6	0.100017	0.21582	0.46064	0.62263	1.12679	1.50917	1.80933	2.00693	2.19617
	199.8	0.100785	0.21488	0.46185	0.62267	1.12789	1.51066	1.81165	2.00759	2.19509
	200	0.101168	0.21393	0.46363	0.62183	1.12925	1.51055	1.81145	2.0083	2.19754
	200.2	0.101487	0.21421	0.4641	0.6225	1.13042	1.51143	1.81207	2.01097	2.19793
	200.4	0.100195	0.21507	0.46323	0.62259	1.13047	1.51223	1.81391	2.01171	2.19885
	200.6	0.100593	0.21288	0.46402	0.62268	1.13023	1.51304	1.81394	2.01109	2.19868
	200.8	0.0996855	0.21365	0.46439	0.62273	1.13173	1.51205	1.81341	2.01232	2.20028
	201	0.0996625	0.2135	0.46407	0.62344	1.13172	1.5127	1.81415	2.01331	2.20021
	201.2	0.0999555	0.21389	0.46429	0.62478	1.13127	1.51394	1.81464	2.01195	2.19991
	201.4	0.100339	0.21468	0.46478	0.62452	1.13232	1.51368	1.81526	2.01269	2.19933
	201.6	0.10025	0.21553	0.46421	0.62475	1.13326	1.51353	1.81656	2.01178	2.20049
	201.8	0.0997485	0.21473	0.46455	0.62502	1.13414	1.51482	1.81708	2.01368	2.20016
	202	0.0995355	0.21676	0.4646	0.62642	1.13478	1.51504	1.81875	2.01324	2.20171
	202.2	0.0995525	0.21617	0.4651	0.62565	1.13539	1.51517	1.81924	2.01599	2.20359
	202.4	0.0996975	0.21689	0.46598	0.62662	1.13596	1.51653	1.81938	2.01615	2.20569
	202.6	0.100141	0.21774	0.46647	0.6278	1.13728	1.51746	1.82027	2.01876	2.2069
	202.8	0.101514	0.2192	0.46641	0.62841	1.13598	1.51876	1.82157	2.01804	2.20849
	203	0.101364	0.21851	0.46712	0.629	1.13641	1.52	1.82063	2.01972	2.20865
	203.2	0.101499	0.21943	0.46652	0.62927	1.13692	1.51997	1.82315	2.01873	2.20903
	203.4	0.101998	0.2182	0.4673	0.6293	1.13805	1.51967	1.8239	2.02011	2.20959
	203.6	0.10112	0.21791	0.46872	0.62884	1.13797	1.52086	1.82329	2.02022	2.20821
	203.8	0.100706	0.2171	0.46883	0.62991	1.13963	1.52078	1.82346	2.02099	2.20822
	204	0.102298	0.21801	0.46926	0.62883	1.13975	1.52234	1.82511	2.02194	2.2087
	204.2	0.101946	0.21865	0.47034	0.62999	1.14115	1.52317	1.82499	2.02275	2.20819
	204.4	0.101768	0.22082	0.46961	0.63057	1.14044	1.5252	1.82699	2.02343	2.20946
	204.6	0.101894	0.22115	0.46913	0.63133	1.14115	1.52525	1.82921	2.02356	2.21111
	204.8	0.101833	0.2221	0.47068	0.63058	1.14097	1.52521	1.82961	2.02341	2.21189
	205	0.101023	0.22105	0.47084	0.63156	1.14157	1.52603	1.82997	2.02447	2.2118
	205.2	0.101381	0.22027	0.47087	0.63227	1.14191	1.52758	1.83012	2.02567	2.21293
	205.4	0.100235	0.21982	0.47171	0.63175	1.14236	1.52724	1.83061	2.02676	2.21274
	205.6	0.10073	0.21891	0.4719	0.63161	1.14303	1.52728	1.83025	2.0275	2.21291
	205.8	0.100581	0.21772	0.4714	0.6316	1.14454	1.52836	1.83059	2.02824	2.21396
	206	0.101088	0.21894	0.47141	0.6321	1.14613	1.52752	1.83145	2.02832	2.21473
	206.2	0.101309	0.21806	0.47195	0.63198	1.14588	1.52746	1.83214	2.02877	2.2144
	206.4	0.101364	0.21721	0.47277	0.63266	1.14656	1.52849	1.83175	2.02875	2.21398
	206.6	0.101821	0.21984	0.47295	0.63398	1.14738	1.52902	1.83341	2.03136	2.2152
	206.8	0.10279	0.22021	0.47439	0.63508	1.14819	1.52955	1.83419	2.0333	2.21519
	207	0.101109	0.21979	0.47465	0.63532	1.14741	1.52967	1.83411	2.03205	2.21721
	207.2	0.100641	0.22079	0.47497	0.63674	1.14864	1.53121	1.83552	2.03252	2.21821
	207.4	0.10182	0.2207	0.47462	0.6366	1.14881	1.53025	1.83513	2.03334	2.21938
	207.6	0.10066	0.2187	0.47448	0.63641	1.14819	1.53081	1.83441	2.03205	2.21938
	207.8	0.100533	0.2196	0.47292	0.63656	1.14729	1.53161	1.83545	2.0321	2.22078
	208	0.102591	0.2197	0.4731	0.63697	1.14868	1.5324	1.83684	2.03408	2.21894
	208.2	0.102209	0.22053	0.4734	0.63624	1.14913	1.5308	1.83654	2.03475	2.22102
	208.4	0.101409	0.22185	0.47371	0.63743	1.15102	1.53114	1.83874	2.03457	2.2213
	208.6	0.101681	0.22236	0.47434	0.63833	1.15286	1.53169	1.84042	2.03583	2.22241
	208.8	0.101519	0.22204	0.47519	0.63936	1.15502	1.53209	1.8406	2.03564	2.22184
	209	0.100942	0.22181	0.47594	0.63962	1.15585	1.53266	1.84021	2.03435	2.22328
	209.2	0.101736	0.22146	0.47616	0.63954	1.15616	1.53446	1.8408	2.03517	2.22304
	209.4	0.10172	0.21986	0.47553	0.63958	1.15666	1.53605	1.84065	2.03456	2.22435
	209.6	0.103018	0.22027	0.476	0.63908	1.15665	1.53715	1.84054	2.03545	2.22334
	209.8	0.103429	0.21972	0.4755	0.63917	1.1565	1.53822	1.84202	2.03607	2.22394
	210	0.10317	0.22077	0.47541	0.63975	1.15702	1.53975	1.84418	2.03854	2.22488
	210.2	0.103688	0.22105	0.47519	0.64166	1.15846	1.54061	1.84507	2.03963	2.22582
	210.4	0.103794	0.22094	0.4763	0.64234	1.15862	1.54089	1.84505	2.04043	2.22541
	210.6	0.10311	0.21807	0.47655	0.6423	1.15926	1.54239	1.84567	2.04051	2.22645
	210.8	0.102727	0.21606	0.47852	0.64271	1.15927	1.54261	1.84495	2.04207	2.22741
	211	0.104288	0.2137	0.47888	0.64334	1.15829	1.54354	1.84392	2.04029	2.22774
	211.2	0.103409	0.20956	0.48052	0.64287	1.1591	1.54359	1.84332	2.04009	2.2267
	211.4	0.104191	0.20848	0.48028	0.64337	1.15922	1.54506	1.84562	2.0425	2.22821
	211.6	0.104462	0.20787	0.48131	0.64448	1.16013	1.54448	1.84601	2.04245	2.22893
	211.8	0.104537	0.20842	0.48072	0.64356	1.16077	1.54573	1.84675	2.04254	2.22881
	212	0.102844	0.2076	0.4816	0.64301	1.16284	1.5462	1.84635	2.04521	2.22906
	212.2	0.103065	0.20959	0.48027	0.64296	1.16206	1.54696	1.8477	2.04646	2.23035
	212.4	0.101837	0.20936	0.48175	0.6435	1.16327	1.54761	1.84763	2.0456	2.22966
	212.6	0.100499	0.20972	0.48107	0.64498	1.16408	1.54879	1.84827	2.047	2.23171
	212.8	0.100891	0.20803	0.48179	0.64596	1.165	1.5481	1.84924	2.04788	2.23287
	213	0.102377	0.20819	0.48269	0.64627	1.16468	1.54817	1.85037	2.04847	2.23379
	213.2	0.102652	0.20635	0.48243	0.64687	1.16589	1.54867	1.85112	2.04902	2.23544
	213.4	0.103874	0.20615	0.48286	0.64676	1.16605	1.54813	1.85105	2.04993	2.23698
	213.6	0.106799	0.20786	0.48329	0.64588	1.16581	1.54843	1.85229	2.05072	2.23481
	213.8	0.106387	0.20779	0.48298	0.64698	1.16605	1.54972	1.85297	2.05188	2.23452
	214	0.105492	0.20672	0.48223	0.64814	1.1661	1.55091	1.85416	2.05127	2.23505
	214.2	0.106193	0.20852	0.48296	0.64814	1.16637	1.55078	1.85439	2.05183	2.23419
	214.4	0.106272	0.20936	0.48218	0.64869	1.16678	1.5523	1.85473	2.05323	2.23424
	214.6	0.104173	0.20759	0.4813	0.64914	1.16793	1.55148	1.85604	2.05157	2.23582
	214.8	0.104928	0.21052	0.48223	0.64887	1.16906	1.55104	1.85616	2.05177	2.23668
	215	0.104294	0.21142	0.48248	0.64924	1.17065	1.55104	1.8567	2.05346	2.2373
	215.2	0.10268	0.21068	0.48383	0.65031	1.17107	1.55215	1.85802	2.05491	2.23879
	215.4	0.104237	0.20992	0.48507	0.64998	1.17177	1.55295	1.85839	2.05546	2.23942
	215.6	0.104729	0.21147	0.48638	0.65024	1.17245	1.55543	1.85764	2.05779	2.24022
	215.8	0.105481	0.21091	0.48676	0.65069	1.17209	1.5569	1.8594	2.05757	2.24029
	216	0.106757	0.212	0.4861	0.65101	1.17257	1.55743	1.86	2.05684	2.24145
	216.2	0.108625	0.21182	0.48594	0.651	1.17335	1.55825	1.8599	2.05659	2.24186
	216.4	0.107532	0.21283	0.48641	0.65212	1.17414	1.55784	1.86115	2.05546	2.24255
	216.6	0.108599	0.21199	0.48678	0.65263	1.17409	1.5596	1.86083	2.05544	2.24311
	216.8	0.106338	0.21077	0.48674	0.65273	1.17531	1.56001	1.86121	2.05582	2.24423
	217	0.105634	0.20994	0.4882	0.65277	1.17529	1.56049	1.86325	2.05856	2.24321
	217.2	0.104864	0.21054	0.4878	0.65272	1.17452	1.5608	1.86432	2.05896	2.24331
	217.4	0.1045	0.20989	0.48784	0.65319	1.17471	1.56113	1.86507	2.06107	2.24281
	217.6	0.102402	0.20844	0.48844	0.65409	1.1746	1.56046	1.86707	2.0611	2.24388
	217.8	0.10485	0.20962	0.48905	0.65536	1.17424	1.56183	1.86784	2.06268	2.24511
	218	0.104961	0.20941	0.48901	0.65566	1.17562	1.56272	1.86657	2.06296	2.24636
	218.2	0.105479	0.20963	0.49016	0.65664	1.17763	1.56304	1.86769	2.06249	2.2471
	218.4	0.105197	0.21062	0.49097	0.65578	1.1783	1.5648	1.86868	2.0632	2.24813
	218.6	0.106779	0.21242	0.49105	0.65653	1.17962	1.56401	1.86867	2.06564	2.24776
	218.8	0.106042	0.21161	0.49027	0.6554	1.17956	1.56345	1.86876	2.06624	2.2472
	219	0.105906	0.21203	0.49008	0.65603	1.17963	1.56436	1.87017	2.06653	2.24696
	219.2	0.105348	0.21222	0.49148	0.65535	1.17901	1.56514	1.87063	2.06681	2.24771
	219.4	0.106715	0.21233	0.49032	0.65639	1.17928	1.5657	1.87118	2.06692	2.24836
	219.6	0.106442	0.21144	0.49036	0.65596	1.17925	1.56603	1.8712	2.06744	2.24863
	219.8	0.106317	0.21113	0.49046	0.65839	1.18065	1.56732	1.87142	2.06675	2.24949
	220	0.107192	0.21122	0.49101	0.65759	1.182	1.56786	1.87184	2.0664	2.25073
	220.2	0.107108	0.21009	0.49033	0.65854	1.18262	1.56764	1.87169	2.06816	2.25035
	220.4	0.106098	0.2094	0.49097	0.65962	1.18233	1.568	1.87315	2.06841	2.25066
	220.6	0.107027	0.20928	0.49181	0.66057	1.18365	1.56954	1.87517	2.06766	2.25107
	220.8	0.107172	0.20958	0.49268	0.65962	1.18403	1.56988	1.87446	2.06903	2.25195
	221	0.107383	0.20983	0.49366	0.65989	1.18331	1.57038	1.8753	2.06997	2.25278
	221.2	0.108152	0.21136	0.49354	0.66038	1.18397	1.57227	1.87691	2.06981	2.25356
	221.4	0.108194	0.21054	0.49358	0.65976	1.18468	1.57271	1.87562	2.07	2.25434
	221.6	0.106511	0.21243	0.49394	0.66004	1.18458	1.57381	1.87643	2.07076	2.25463
	221.8	0.106214	0.21279	0.4932	0.66051	1.18534	1.57463	1.87868	2.07149	2.25391
	222	0.105952	0.21271	0.49283	0.66193	1.18582	1.57398	1.87911	2.07389	2.25493
	222.2	0.105762	0.21193	0.49288	0.6626	1.18696	1.57325	1.87842	2.07493	2.25473
	222.4	0.107391	0.21438	0.49398	0.66387	1.18821	1.57368	1.87893	2.07539	2.25568
	222.6	0.109489	0.21246	0.49377	0.66292	1.18953	1.57352	1.87746	2.07669	2.25533
	222.8	0.110447	0.21337	0.49524	0.6637	1.18924	1.57382	1.87864	2.07789	2.2551
	223	0.110592	0.21454	0.49612	0.66402	1.18952	1.57573	1.87912	2.07745	2.25444
	223.2	0.110156	0.21483	0.49658	0.66446	1.18905	1.5764	1.8789	2.07765	2.2563
	223.4	0.107792	0.21452	0.49563	0.66445	1.19003	1.57629	1.88074	2.07879	2.25511
	223.6	0.107233	0.21597	0.49607	0.66605	1.18999	1.57778	1.88219	2.07917	2.25761
	223.8	0.10541	0.21583	0.49615	0.66485	1.19033	1.57728	1.88118	2.07933	2.26008
	224	0.104118	0.21521	0.49526	0.6645	1.19126	1.57714	1.88118	2.08047	2.2609
	224.2	0.104139	0.21518	0.49571	0.66366	1.1916	1.57899	1.88434	2.08199	2.26061
	224.4	0.105075	0.21509	0.49667	0.66421	1.19121	1.5798	1.88411	2.08293	2.26238
	224.6	0.104711	0.21658	0.49689	0.66375	1.19065	1.57861	1.88399	2.08289	2.26095
	224.8	0.105871	0.2173	0.4974	0.66535	1.19158	1.57913	1.88533	2.08351	2.26151
	225	0.106504	0.21841	0.49856	0.66696	1.19193	1.57956	1.88732	2.08349	2.26155
	225.2	0.107139	0.21872	0.49873	0.66813	1.19291	1.57948	1.88656	2.08428	2.262
	225.4	0.107716	0.21914	0.49898	0.66717	1.19287	1.58012	1.88669	2.08545	2.26376
	225.6	0.106734	0.21866	0.49907	0.66866	1.19405	1.5811	1.88822	2.08611	2.26614
	225.8	0.106844	0.21751	0.49936	0.66839	1.19557	1.58172	1.88734	2.0875	2.26417
	226	0.10688	0.21737	0.50063	0.66795	1.19704	1.58215	1.88716	2.08631	2.26513
	226.2	0.107827	0.21665	0.50157	0.66833	1.19747	1.58211	1.88619	2.08549	2.26536
	226.4	0.106797	0.21534	0.50172	0.67056	1.19992	1.58228	1.88773	2.08523	2.26446
	226.6	0.108536	0.21512	0.50186	0.66989	1.19983	1.58322	1.88803	2.08515	2.26557
	226.8	0.108673	0.21476	0.50206	0.67145	1.2001	1.58418	1.88987	2.0856	2.26744
	227	0.109277	0.21402	0.50035	0.67141	1.19863	1.58491	1.89011	2.08737	2.26818
	227.2	0.107488	0.21472	0.49959	0.67195	1.19954	1.58579	1.89108	2.08844	2.26839
	227.4	0.108541	0.21653	0.50036	0.6718	1.19849	1.5861	1.89123	2.08944	2.26899
	227.6	0.107867	0.21491	0.50034	0.67257	1.19983	1.58684	1.89311	2.09057	2.26828
	227.8	0.106691	0.21615	0.49991	0.67189	1.19991	1.58667	1.89207	2.09027	2.26935
	228	0.107188	0.21658	0.50097	0.67231	1.20104	1.5872	1.89306	2.08905	2.26956
	228.2	0.107261	0.21712	0.50218	0.6715	1.20141	1.58778	1.89483	2.09001	2.27059
	228.4	0.10715	0.21585	0.50286	0.67099	1.20241	1.58913	1.8949	2.09059	2.27041
	228.6	0.107613	0.21751	0.50357	0.67045	1.20361	1.59071	1.89397	2.09157	2.27124
	228.8	0.109986	0.2161	0.5046	0.67128	1.2041	1.5925	1.89633	2.09104	2.27127
	229	0.108682	0.21472	0.50509	0.6719	1.20559	1.59321	1.8969	2.09243	2.27258
	229.2	0.108626	0.21552	0.50491	0.67307	1.20648	1.59385	1.89665	2.09284	2.27342
	229.4	0.107703	0.21542	0.50439	0.67441	1.20597	1.5939	1.89707	2.09232	2.27419
	229.6	0.107144	0.21368	0.50518	0.675	1.20639	1.59269	1.89737	2.09251	2.27475
	229.8	0.105457	0.21441	0.50566	0.67423	1.20636	1.59262	1.89753	2.09435	2.27465
	230	0.106281	0.21612	0.50562	0.67501	1.20687	1.59314	1.89837	2.09472	2.27468
	230.2	0.106432	0.21461	0.5059	0.67506	1.20744	1.59264	1.90001	2.0949	2.27482
	230.4	0.106277	0.21545	0.50596	0.67504	1.20923	1.59386	1.90055	2.09594	2.27505
	230.6	0.106951	0.2173	0.50643	0.67578	1.20847	1.59435	1.90098	2.09639	2.27528
	230.8	0.106719	0.21814	0.50667	0.67708	1.2085	1.59506	1.90111	2.09651	2.27658
	231	0.107664	0.21946	0.5072	0.67735	1.20816	1.59472	1.90112	2.09673	2.2765
	231.2	0.10887	0.21999	0.50752	0.67726	1.20839	1.59595	1.90008	2.09664	2.27715
	231.4	0.11056	0.21932	0.50795	0.67709	1.20729	1.59503	1.9021	2.09725	2.27784
	231.6	0.108778	0.22003	0.50754	0.67775	1.20843	1.59638	1.90171	2.09742	2.27782
	231.8	0.109057	0.21969	0.50678	0.6781	1.20869	1.5964	1.90229	2.09819	2.27739
	232	0.108632	0.21932	0.50679	0.67827	1.20969	1.59753	1.90301	2.0997	2.27941
	232.2	0.108696	0.22013	0.506	0.6792	1.21047	1.59785	1.90461	2.10013	2.27921
	232.4	0.108116	0.22131	0.50707	0.67981	1.21154	1.59873	1.90396	2.09971	2.27906
	232.6	0.108782	0.22063	0.50799	0.68056	1.21115	1.5988	1.90638	2.10132	2.27929
	232.8	0.108966	0.22205	0.51046	0.68054	1.21157	1.59985	1.90726	2.10065	2.28088
	233	0.106938	0.22182	0.51096	0.67981	1.21234	1.59963	1.90712	2.10017	2.2799
	233.2	0.105826	0.22218	0.51336	0.68066	1.21217	1.60056	1.90642	2.09998	2.28154
	233.4	0.106279	0.22139	0.51309	0.68028	1.2132	1.60177	1.90658	2.10035	2.28271
	233.6	0.108434	0.22212	0.5136	0.68036	1.21447	1.60258	1.90698	2.10022	2.28315
	233.8	0.107746	0.2208	0.51222	0.68052	1.21621	1.60267	1.907	2.10078	2.28276
	234	0.11022	0.22082	0.51262	0.68192	1.21603	1.60348	1.90902	2.10266	2.28358
	234.2	0.111399	0.2217	0.51159	0.68093	1.21603	1.60369	1.91072	2.10371	2.28397
	234.4	0.111239	0.22343	0.51251	0.6815	1.2156	1.60358	1.91164	2.10449	2.28361
	234.6	0.109991	0.22357	0.51184	0.68134	1.21619	1.6033	1.91175	2.10552	2.28521
	234.8	0.111542	0.22456	0.51238	0.68193	1.21645	1.60438	1.91258	2.10688	2.28577
	235	0.110204	0.22378	0.51311	0.68196	1.21701	1.60502	1.91304	2.10539	2.28519
	235.2	0.109174	0.22306	0.51373	0.6824	1.2176	1.60597	1.91388	2.10545	2.2853
	235.4	0.109351	0.22267	0.5131	0.68333	1.21896	1.60615	1.9153	2.10644	2.28645
	235.6	0.10959	0.22203	0.51436	0.68281	1.21912	1.60685	1.91639	2.10494	2.28541
	235.8	0.108495	0.22202	0.5145	0.68268	1.21998	1.6059	1.91666	2.10558	2.28544
	236	0.110052	0.22216	0.51492	0.6839	1.22027	1.60701	1.91622	2.10714	2.28698
	236.2	0.110495	0.22197	0.51541	0.6842	1.22148	1.60724	1.91694	2.10856	2.28825
	236.4	0.109539	0.22154	0.5162	0.685	1.22226	1.60835	1.91523	2.10875	2.289
	236.6	0.109195	0.22268	0.51557	0.68663	1.22385	1.60985	1.91584	2.11127	2.29017
	236.8	0.109508	0.22244	0.515	0.68707	1.22257	1.61108	1.91805	2.11255	2.29069
	237	0.108248	0.22361	0.51432	0.68649	1.22329	1.61172	1.91866	2.11376	2.29038
	237.2	0.108627	0.22497	0.51354	0.68809	1.22307	1.612	1.91759	2.11443	2.2896
	237.4	0.108168	0.2248	0.51377	0.68842	1.22372	1.61255	1.91868	2.11593	2.2901
	237.6	0.108221	0.22597	0.51366	0.68931	1.22267	1.61199	1.91879	2.11529	2.29032
	237.8	0.108453	0.22828	0.51492	0.68983	1.22353	1.61274	1.91864	2.11536	2.29244
	238	0.109319	0.22828	0.5155	0.6904	1.224	1.61285	1.9193	2.11709	2.29262
	238.2	0.108728	0.22762	0.51621	0.68971	1.22441	1.61328	1.91947	2.11799	2.29337
	238.4	0.109579	0.22861	0.51575	0.68961	1.22474	1.61394	1.92032	2.11864	2.29256
	238.6	0.109235	0.22721	0.51699	0.68869	1.22479	1.61456	1.91953	2.11962	2.29412
	238.8	0.108456	0.22512	0.51621	0.68859	1.22702	1.61554	1.9204	2.11912	2.29317
	239	0.108333	0.22463	0.51632	0.68925	1.22692	1.61528	1.92005	2.11711	2.29385
	239.2	0.10819	0.22566	0.51674	0.69024	1.22761	1.61665	1.92142	2.1171	2.29436
	239.4	0.108349	0.22561	0.51771	0.69012	1.22805	1.61703	1.9207	2.11709	2.29524
	239.6	0.110305	0.22667	0.51719	0.68945	1.22896	1.618	1.92119	2.11714	2.29404
	239.8	0.111276	0.22677	0.5182	0.69083	1.22856	1.61854	1.92055	2.1169	2.29567
	240	0.110402	0.22662	0.5185	0.69044	1.22933	1.61904	1.92123	2.11837	2.29563
	240.2	0.111408	0.22601	0.51933	0.69114	1.22969	1.61913	1.921	2.11778	2.29655
	240.4	0.111079	0.22591	0.51947	0.69142	1.22979	1.61924	1.92317	2.11718	2.29754
	240.6	0.110175	0.22527	0.52054	0.69258	1.23113	1.61818	1.92423	2.12012	2.29837
	240.8	0.110219	0.22619	0.52101	0.69378	1.23125	1.61816	1.92329	2.12054	2.29774
	241	0.110529	0.22802	0.52157	0.69389	1.23161	1.61975	1.92304	2.12154	2.29904
	241.2	0.110178	0.22758	0.52137	0.69325	1.23205	1.62033	1.92349	2.12406	2.29854
	241.4	0.110775	0.22915	0.5211	0.69339	1.23252	1.62117	1.92451	2.12501	2.29865
	241.6	0.111029	0.22911	0.52113	0.69375	1.23274	1.62247	1.92592	2.12376	2.3001
	241.8	0.110665	0.23053	0.52122	0.69312	1.23368	1.6227	1.92791	2.12597	2.30135
	242	0.110734	0.23085	0.52186	0.69371	1.2338	1.62295	1.92951	2.12551	2.30076
	242.2	0.111098	0.23227	0.52241	0.69458	1.23438	1.62334	1.92983	2.12514	2.30097
	242.4	0.111092	0.23199	0.52375	0.69551	1.2346	1.62332	1.92843	2.1245	2.30032
	242.6	0.110946	0.23315	0.5245	0.69595	1.23405	1.62386	1.92907	2.12548	2.30008
	242.8	0.111326	0.23207	0.52453	0.69553	1.23512	1.62559	1.92906	2.12723	2.30055
	243	0.112205	0.23159	0.52398	0.69569	1.23583	1.62488	1.92999	2.128	2.30112
	243.2	0.111827	0.23065	0.52417	0.69571	1.23583	1.62596	1.93132	2.12774	2.30199
	243.4	0.112363	0.23002	0.52433	0.69515	1.23603	1.62712	1.93291	2.12994	2.30418
	243.6	0.112593	0.22961	0.52386	0.69569	1.23698	1.62692	1.93325	2.12902	2.30516
	243.8	0.112164	0.22962	0.52516	0.69667	1.236	1.62664	1.93448	2.12729	2.30401
	244	0.111199	0.22927	0.5263	0.69788	1.23637	1.62741	1.93528	2.12773	2.3051
	244.2	0.110879	0.22951	0.52666	0.69916	1.23758	1.62721	1.93671	2.12984	2.306
	244.4	0.110399	0.22858	0.52607	0.70052	1.23879	1.62685	1.9363	2.12867	2.30601
	244.6	0.109627	0.22878	0.52683	0.70096	1.23955	1.62787	1.9368	2.13012	2.30673
	244.8	0.110037	0.23074	0.52654	0.701	1.23989	1.62799	1.93766	2.13192	2.30857
	245	0.11151	0.23063	0.52609	0.70033	1.24067	1.62854	1.93595	2.13349	2.30822
	245.2	0.111886	0.23129	0.52688	0.69933	1.2407	1.62954	1.93667	2.13404	2.30757
	245.4	0.111883	0.23378	0.52764	0.69952	1.24008	1.62931	1.93758	2.13524	2.30768
	245.6	0.112467	0.2344	0.52777	0.69986	1.24085	1.62999	1.93836	2.13516	2.30644
	245.8	0.112976	0.23304	0.52858	0.70047	1.24245	1.63114	1.93704	2.13512	2.30564
	246	0.112557	0.23384	0.52875	0.70092	1.24234	1.63228	1.94049	2.13487	2.30819
	246.2	0.113113	0.23385	0.5277	0.70079	1.24278	1.63251	1.93974	2.13381	2.30896
	246.4	0.112418	0.2328	0.52818	0.70053	1.24397	1.63361	1.94099	2.13485	2.30909
	246.6	0.113014	0.23265	0.52841	0.69957	1.2445	1.63392	1.94044	2.13462	2.31019
	246.8	0.112486	0.23284	0.52748	0.69956	1.24441	1.63381	1.94277	2.13458	2.31185
	247	0.112682	0.2323	0.5282	0.70058	1.24664	1.63314	1.94148	2.13451	2.30992
	247.2	0.112764	0.23206	0.52916	0.70184	1.24714	1.63394	1.94303	2.13489	2.31119
	247.4	0.114489	0.23331	0.52947	0.70289	1.24792	1.63394	1.9432	2.13532	2.3124
	247.6	0.11303	0.23333	0.52971	0.70447	1.2482	1.63478	1.94494	2.13702	2.31191
	247.8	0.11364	0.23365	0.52996	0.70345	1.24884	1.63588	1.94461	2.1378	2.31199
	248	0.113641	0.23374	0.52873	0.70402	1.24881	1.63779	1.94511	2.13858	2.313
	248.2	0.113766	0.23362	0.52978	0.704	1.24954	1.63726	1.94397	2.14065	2.31339
	248.4	0.113402	0.23364	0.52892	0.70417	1.24864	1.63783	1.94483	2.14096	2.31332
	248.6	0.115611	0.23396	0.52986	0.70417	1.24837	1.63823	1.94344	2.14129	2.31492
	248.8	0.114432	0.23429	0.53017	0.70636	1.24912	1.63669	1.94277	2.14149	2.31547
	249	0.114483	0.23588	0.53271	0.7058	1.24884	1.6351	1.9427	2.14199	2.31665
	249.2	0.113809	0.23561	0.53266	0.70785	1.24959	1.636	1.94436	2.14227	2.31674
	249.4	0.113706	0.23513	0.53323	0.70748	1.2507	1.63646	1.94421	2.14239	2.31792
	249.6	0.112743	0.23515	0.53279	0.70769	1.25186	1.63722	1.94599	2.14287	2.31839
	249.8	0.114074	0.23509	0.53363	0.70759	1.25225	1.63984	1.94589	2.14316	2.31855
	250	0.112308	0.23449	0.5325	0.70725	1.25274	1.64151	1.94703	2.14345	2.31641
	250.2	0.111848	0.23647	0.53215	0.70463	1.25292	1.64126	1.94621	2.14449	2.31747
	250.4	0.112618	0.23682	0.53287	0.70462	1.25312	1.64212	1.94703	2.14508	2.31699
	250.6	0.112633	0.23754	0.53326	0.7054	1.25316	1.64269	1.9468	2.1452	2.31774
	250.8	0.112049	0.23755	0.5339	0.70541	1.25327	1.64267	1.94869	2.14637	2.31727
	251	0.114429	0.23817	0.53347	0.70638	1.25421	1.64359	1.94836	2.1461	2.31847
	251.2	0.11446	0.23771	0.53457	0.709	1.25394	1.64447	1.94975	2.14447	2.31827
	251.4	0.113678	0.23727	0.53401	0.70952	1.25479	1.64495	1.94946	2.14592	2.31901
	251.6	0.113779	0.23657	0.53504	0.70926	1.25574	1.64528	1.95034	2.14674	2.31877
	251.8	0.113946	0.23701	0.53465	0.70906	1.25601	1.64501	1.95105	2.14767	2.31962
	252	0.11387	0.23696	0.53587	0.70975	1.25587	1.6445	1.95284	2.14841	2.322
	252.2	0.114658	0.23753	0.53535	0.70929	1.25616	1.6449	1.95247	2.14951	2.32173
	252.4	0.114841	0.23886	0.53652	0.70931	1.25597	1.6457	1.95399	2.15053	2.32164
	252.6	0.11444	0.23997	0.53544	0.70973	1.25705	1.64624	1.95507	2.1495	2.32227
	252.8	0.113058	0.24057	0.53613	0.71074	1.25724	1.64797	1.95616	2.14953	2.32341
	253	0.113261	0.24124	0.53564	0.71061	1.25734	1.64879	1.95575	2.15108	2.32282
	253.2	0.112839	0.24097	0.53449	0.71112	1.25906	1.65072	1.95694	2.15104	2.3235
	253.4	0.113198	0.2408	0.53523	0.71169	1.26039	1.65109	1.95679	2.15172	2.32522
	253.6	0.112519	0.24095	0.53697	0.7114	1.25993	1.65104	1.95569	2.15182	2.32526
	253.8	0.115524	0.23976	0.53689	0.71105	1.26101	1.6515	1.95612	2.15194	2.32625
	254	0.114524	0.23926	0.53805	0.71135	1.26071	1.65145	1.95691	2.15172	2.32644
	254.2	0.114375	0.23902	0.5395	0.71101	1.26102	1.65129	1.95849	2.15299	2.3261
	254.4	0.114133	0.23902	0.53875	0.71184	1.26082	1.65121	1.95824	2.15163	2.32624
	254.6	0.114572	0.23859	0.53818	0.71107	1.26209	1.65176	1.95879	2.15233	2.32741
	254.8	0.112625	0.23972	0.53906	0.71124	1.26199	1.65164	1.95762	2.15247	2.32731
	255	0.113644	0.23961	0.53884	0.71209	1.26325	1.65309	1.95719	2.15177	2.32824
	255.2	0.114148	0.23982	0.53976	0.7131	1.26309	1.65263	1.95556	2.15158	2.32952
	255.4	0.113472	0.24077	0.54139	0.71346	1.26278	1.65441	1.95745	2.15351	2.32945
	255.6	0.113363	0.24071	0.54083	0.71534	1.26263	1.65465	1.95912	2.15599	2.32993
	255.8	0.113359	0.24178	0.54065	0.71554	1.2626	1.65654	1.96018	2.15725	2.32855
	256	0.112591	0.24196	0.5415	0.71527	1.26282	1.65645	1.96131	2.15853	2.32934
	256.2	0.113688	0.24211	0.54114	0.71533	1.2636	1.65619	1.96326	2.15929	2.32949
	256.4	0.113201	0.24211	0.53982	0.71527	1.26451	1.65513	1.96342	2.15954	2.32933
	256.6	0.113981	0.24252	0.54041	0.71461	1.2651	1.65614	1.96337	2.15911	2.32778
	256.8	0.113782	0.24151	0.54105	0.71677	1.26626	1.6552	1.96511	2.1598	2.32937
	257	0.113729	0.24169	0.54095	0.71638	1.26675	1.65594	1.9657	2.16161	2.32807
	257.2	0.11259	0.24122	0.5412	0.71798	1.26586	1.65803	1.96611	2.16125	2.32864
	257.4	0.113283	0.24034	0.54177	0.71791	1.2663	1.65973	1.96608	2.16148	2.32807
	257.6	0.113825	0.24065	0.5415	0.71869	1.26595	1.65975	1.96635	2.16307	2.32908
	257.8	0.115075	0.24092	0.54095	0.71843	1.26643	1.65963	1.96499	2.16163	2.33003
	258	0.114952	0.24126	0.54151	0.71892	1.26858	1.66084	1.96587	2.1618	2.33185
	258.2	0.115029	0.24293	0.54246	0.7175	1.27055	1.65984	1.96683	2.16146	2.33248
	258.4	0.114843	0.24377	0.54257	0.71888	1.2707	1.65954	1.96869	2.16137	2.33502
	258.6	0.114066	0.24344	0.54337	0.7193	1.2716	1.66036	1.96866	2.16245	2.33544
	258.8	0.114045	0.24242	0.54382	0.71903	1.27191	1.66085	1.97052	2.16365	2.33638
	259	0.114962	0.24331	0.54309	0.72055	1.27042	1.6601	1.97229	2.16277	2.33705
	259.2	0.116327	0.24181	0.5424	0.72084	1.26958	1.66152	1.97013	2.16498	2.337
	259.4	0.115103	0.24221	0.54276	0.72012	1.27033	1.6617	1.96881	2.1654	2.33635
	259.6	0.116111	0.2436	0.54377	0.72001	1.27014	1.66234	1.96942	2.16375	2.33676
	259.8	0.115766	0.24311	0.54392	0.72081	1.27	1.66234	1.9702	2.16458	2.33614
	260	0.115353	0.24382	0.54543	0.71935	1.27053	1.66326	1.96911	2.16581	2.3361
	260.2	0.113804	0.24373	0.54537	0.7205	1.27153	1.66345	1.97033	2.16614	2.33633
	260.4	0.11664	0.24361	0.54612	0.72087	1.27198	1.66387	1.97107	2.16769	2.33707
	260.6	0.115364	0.2416	0.54602	0.72174	1.27289	1.66333	1.9731	2.16961	2.3369
	260.8	0.11598	0.24324	0.54728	0.72175	1.27541	1.66528	1.97263	2.1707	2.33809
	261	0.116528	0.24248	0.54689	0.72341	1.27642	1.66489	1.97342	2.17189	2.33697
	261.2	0.117635	0.24472	0.54832	0.72248	1.27555	1.66543	1.97432	2.17259	2.33801
	261.4	0.117169	0.2432	0.54777	0.72325	1.27659	1.66561	1.97532	2.17296	2.33834
	261.6	0.117517	0.24501	0.54844	0.72409	1.27668	1.66649	1.97423	2.17112	2.33888
	261.8	0.118072	0.24473	0.54791	0.72345	1.27416	1.66688	1.9749	2.17077	2.33876
	262	0.11889	0.24518	0.54713	0.72319	1.27462	1.66778	1.97452	2.17102	2.34089
	262.2	0.11917	0.24425	0.5467	0.72489	1.27661	1.66862	1.97531	2.17112	2.34061
	262.4	0.119313	0.24608	0.54786	0.72463	1.27679	1.66898	1.9749	2.17223	2.34125
	262.6	0.119518	0.24505	0.54739	0.72466	1.27867	1.66879	1.97562	2.17434	2.34298
	262.8	0.118894	0.24565	0.54772	0.72558	1.28025	1.66784	1.97617	2.17428	2.34391
	263	0.117925	0.24498	0.54832	0.72587	1.28056	1.6683	1.97795	2.17367	2.34481
	263.2	0.117569	0.24513	0.54763	0.72591	1.28063	1.6688	1.97932	2.17295	2.34554
	263.4	0.118204	0.24437	0.54817	0.7263	1.2815	1.66985	1.98042	2.17235	2.34626
	263.6	0.118573	0.24531	0.54887	0.72595	1.2801	1.67062	1.98014	2.17366	2.34637
	263.8	0.118446	0.24662	0.54909	0.72685	1.28088	1.67099	1.98092	2.17481	2.34597
	264	0.11761	0.24607	0.54992	0.72656	1.28116	1.67111	1.97863	2.17554	2.34514
	264.2	0.11698	0.24716	0.55094	0.72677	1.28178	1.67061	1.97942	2.17736	2.34531
	264.4	0.116047	0.24689	0.55083	0.72811	1.28179	1.67074	1.97994	2.17674	2.34596
	264.6	0.116678	0.24627	0.55026	0.72872	1.28311	1.67069	1.98123	2.17555	2.34623
	264.8	0.11693	0.24576	0.55087	0.72886	1.2839	1.67234	1.98034	2.17735	2.34713
	265	0.116506	0.24673	0.55172	0.72979	1.28361	1.6737	1.98262	2.1782	2.34822
	265.2	0.118242	0.2462	0.55224	0.72948	1.28433	1.67449	1.98087	2.1774	2.34865
	265.4	0.118073	0.24776	0.55215	0.72981	1.28335	1.67516	1.98022	2.17825	2.34867
	265.6	0.116765	0.24872	0.55304	0.73042	1.28287	1.67586	1.97972	2.17928	2.34864
	265.8	0.116811	0.24875	0.55246	0.72978	1.28341	1.67528	1.98064	2.17829	2.34922
	266	0.118262	0.24879	0.55168	0.72964	1.28512	1.67402	1.98089	2.17912	2.34908
	266.2	0.115998	0.24865	0.55167	0.73021	1.28435	1.67416	1.98061	2.17996	2.35071
	266.4	0.115511	0.24856	0.55196	0.72966	1.28518	1.67425	1.98212	2.17994	2.34966
	266.6	0.115701	0.24851	0.55189	0.73006	1.28516	1.67448	1.9833	2.17968	2.35035
	266.8	0.115161	0.24883	0.55255	0.73012	1.28521	1.67584	1.98354	2.1795	2.34867
	267	0.115208	0.24906	0.55381	0.73163	1.28439	1.67695	1.98384	2.17856	2.34959
	267.2	0.11674	0.24958	0.55377	0.73119	1.28577	1.67804	1.98579	2.17999	2.34813
	267.4	0.116934	0.24882	0.55347	0.73204	1.28679	1.67803	1.98656	2.18166	2.34865
	267.6	0.117722	0.25035	0.55357	0.73213	1.28694	1.67939	1.98795	2.18225	2.34941
	267.8	0.117415	0.24998	0.55522	0.73192	1.28764	1.6782	1.98686	2.18326	2.3514
	268	0.116529	0.25031	0.55491	0.73323	1.28787	1.67877	1.98715	2.1859	2.35051
	268.2	0.116159	0.25092	0.55563	0.73397	1.28828	1.6785	1.98702	2.18548	2.3522
	268.4	0.11675	0.25308	0.55569	0.73399	1.28869	1.6798	1.98665	2.18466	2.3526
	268.6	0.115324	0.25143	0.55614	0.73408	1.29012	1.68019	1.98649	2.18475	2.35227
	268.8	0.116315	0.25135	0.55603	0.7359	1.29028	1.68178	1.98936	2.18544	2.352
	269	0.116518	0.25178	0.55623	0.7344	1.2912	1.68187	1.98955	2.18525	2.3525
	269.2	0.116701	0.25035	0.55616	0.73495	1.29014	1.68372	1.99033	2.18531	2.35184
	269.4	0.116886	0.24941	0.55686	0.73543	1.28987	1.6835	1.99073	2.18733	2.35235
	269.6	0.11748	0.24965	0.55742	0.73624	1.29061	1.68389	1.99073	2.189	2.35278
	269.8	0.116946	0.24967	0.55623	0.73649	1.2912	1.6835	1.99082	2.18969	2.35404
	270	0.117798	0.24879	0.55678	0.7362	1.29223	1.68446	1.99168	2.1902	2.35499
	270.2	0.117703	0.24906	0.55794	0.7363	1.29446	1.68345	1.99177	2.19103	2.3561
	270.4	0.116262	0.24784	0.5586	0.73561	1.29626	1.68444	1.99272	2.19088	2.35675
	270.6	0.11666	0.24793	0.55866	0.73534	1.29576	1.68421	1.99342	2.19149	2.35754
	270.8	0.117832	0.24739	0.55851	0.73463	1.29679	1.68539	1.99411	2.19077	2.35681
	271	0.116877	0.24742	0.55835	0.73576	1.29705	1.68585	1.99485	2.18974	2.35679
	271.2	0.117415	0.24787	0.55788	0.73623	1.29672	1.68777	1.99571	2.1909	2.35768
	271.4	0.119086	0.24878	0.55769	0.7368	1.29557	1.6883	1.99705	2.19003	2.3585
	271.6	0.118585	0.24905	0.55814	0.73707	1.29693	1.68904	1.99661	2.18901	2.35891
	271.8	0.118043	0.25052	0.55951	0.73883	1.2958	1.68885	1.99755	2.18967	2.35996
	272	0.11867	0.25156	0.56018	0.73929	1.29504	1.68937	1.99799	2.19154	2.36018
	272.2	0.117659	0.25213	0.56062	0.74023	1.29712	1.68885	1.99694	2.19042	2.36023
	272.4	0.11667	0.25233	0.56135	0.741	1.29771	1.68958	1.99671	2.19116	2.35996
	272.6	0.118664	0.25372	0.56149	0.74146	1.29773	1.6905	1.99821	2.19204	2.36109
	272.8	0.11835	0.25434	0.56127	0.74023	1.29888	1.68982	1.9978	2.19295	2.36038
	273	0.118044	0.25408	0.56059	0.74074	1.29929	1.69	1.99705	2.19376	2.36073
	273.2	0.118756	0.2531	0.56083	0.74139	1.29839	1.68974	1.99962	2.19392	2.36063
	273.4	0.120156	0.25291	0.56066	0.74083	1.29904	1.68906	1.9988	2.19392	2.36169
	273.6	0.118794	0.25338	0.56157	0.74051	1.29909	1.68983	1.9983	2.19576	2.36104
	273.8	0.118735	0.25231	0.56185	0.74179	1.30022	1.69187	1.99819	2.19595	2.36122
	274	0.118819	0.25274	0.56396	0.7411	1.3014	1.69204	1.99946	2.19456	2.36369
	274.2	0.118777	0.25505	0.56424	0.74095	1.30248	1.69273	1.99989	2.19746	2.36437
	274.4	0.117276	0.25511	0.56497	0.74216	1.30288	1.69308	2.00092	2.19814	2.36473
	274.6	0.117554	0.25423	0.56468	0.74334	1.305	1.69292	2.00192	2.19802	2.36569
	274.8	0.117355	0.25512	0.56548	0.74334	1.30531	1.69344	2.00304	2.19815	2.36733
	275	0.118195	0.25463	0.56417	0.74467	1.30435	1.69404	2.00414	2.19859	2.3668
	275.2	0.119177	0.25484	0.56387	0.74507	1.30403	1.69464	2.00393	2.19789	2.36821
	275.4	0.120464	0.25509	0.56339	0.74525	1.30419	1.69572	2.00331	2.19945	2.36923
	275.6	0.119639	0.25561	0.56303	0.74533	1.30241	1.69594	2.0031	2.19801	2.36881
	275.8	0.120647	0.25553	0.56292	0.74595	1.30212	1.69567	2.00352	2.19724	2.36875
	276	0.119881	0.2566	0.56397	0.74489	1.3036	1.6965	2.00329	2.19803	2.36885
	276.2	0.11966	0.25507	0.56363	0.74421	1.30401	1.69729	2.00326	2.19824	2.3675
	276.4	0.118838	0.2557	0.56542	0.74511	1.3054	1.69797	2.00392	2.19868	2.36643
	276.6	0.121269	0.25584	0.56608	0.74535	1.3064	1.69845	2.00508	2.20056	2.3674
	276.8	0.11982	0.25677	0.56522	0.74586	1.30726	1.70039	2.00519	2.20229	2.36861
	277	0.119893	0.25695	0.56533	0.74716	1.30815	1.70127	2.00641	2.20389	2.36841
	277.2	0.119031	0.25791	0.5665	0.7473	1.30823	1.7015	2.00762	2.20436	2.36804
	277.4	0.119282	0.25835	0.56578	0.74737	1.30776	1.70101	2.00987	2.20375	2.36939
	277.6	0.118678	0.25727	0.56624	0.74754	1.30744	1.70146	2.00968	2.20325	2.36983
	277.8	0.120712	0.25732	0.56811	0.74655	1.3077	1.70103	2.00946	2.20339	2.36953
	278	0.12133	0.25663	0.56879	0.74678	1.30729	1.70011	2.01021	2.2042	2.37081
	278.2	0.120507	0.25693	0.56876	0.74759	1.30772	1.69944	2.00999	2.20525	2.37269
	278.4	0.121206	0.25705	0.56863	0.74762	1.30886	1.70011	2.00952	2.20586	2.37242
	278.6	0.121015	0.25791	0.56779	0.74892	1.30941	1.70002	2.01072	2.20912	2.37186
	278.8	0.119598	0.25844	0.56761	0.75043	1.30886	1.69961	2.01233	2.20996	2.37153
	279	0.119096	0.25914	0.56751	0.74989	1.30938	1.70012	2.01314	2.20827	2.37169
	279.2	0.120651	0.25918	0.56784	0.74943	1.30961	1.70048	2.01258	2.20837	2.37175
	279.4	0.118717	0.25923	0.56868	0.75006	1.31002	1.70128	2.01278	2.20789	2.37273
	279.6	0.117504	0.26021	0.57005	0.74903	1.31079	1.70162	2.01325	2.20743	2.37346
	279.8	0.117969	0.25997	0.56937	0.74982	1.31155	1.70203	2.01285	2.20768	2.37476
	280	0.117435	0.25997	0.56871	0.7508	1.31223	1.70246	2.01199	2.20885	2.3746
	280.2	0.118534	0.25929	0.5693	0.7524	1.31267	1.70393	2.01421	2.20894	2.37487
	280.4	0.120386	0.25849	0.56829	0.75258	1.31263	1.70359	2.01466	2.21026	2.3744
	280.6	0.119697	0.25784	0.56854	0.75357	1.314	1.70365	2.01496	2.20838	2.37468
	280.8	0.119933	0.25752	0.56967	0.75248	1.31489	1.70423	2.01584	2.20992	2.37465
	281	0.120076	0.25709	0.57083	0.75331	1.31537	1.70417	2.01491	2.21063	2.37408
	281.2	0.119459	0.25862	0.57109	0.75303	1.31716	1.70424	2.014	2.20925	2.37383
	281.4	0.118458	0.25959	0.57139	0.75265	1.31627	1.70519	2.01371	2.20922	2.37367
	281.6	0.11959	0.26074	0.5721	0.7524	1.31609	1.70601	2.01537	2.21053	2.37396
	281.8	0.119918	0.26095	0.57259	0.7541	1.31695	1.70634	2.01622	2.21015	2.37436
	282	0.120301	0.2615	0.57296	0.75322	1.31671	1.70784	2.01768	2.21183	2.37547
	282.2	0.119064	0.2604	0.57302	0.75284	1.31554	1.70831	2.01834	2.2131	2.37655
	282.4	0.120077	0.26053	0.57391	0.75338	1.3187	1.70877	2.01883	2.21476	2.37732
	282.6	0.119939	0.26	0.57295	0.75415	1.31823	1.70948	2.01633	2.21571	2.37677
	282.8	0.119527	0.26078	0.57283	0.7536	1.31702	1.71026	2.0155	2.21583	2.37648
	283	0.120438	0.26113	0.57261	0.7551	1.31812	1.70887	2.01649	2.21515	2.37732
	283.2	0.119894	0.26219	0.57384	0.75604	1.31841	1.71045	2.01664	2.21649	2.37772
	283.4	0.119578	0.26215	0.57399	0.75712	1.31727	1.71028	2.01788	2.21558	2.37824
	283.6	0.11984	0.26184	0.57455	0.75689	1.31902	1.70966	2.01938	2.21562	2.37977
	283.8	0.119665	0.26144	0.57421	0.75677	1.32076	1.70942	2.02038	2.2166	2.38049
	284	0.119284	0.26148	0.5744	0.75708	1.32024	1.71105	2.02032	2.21681	2.37951
	284.2	0.1207	0.26124	0.57395	0.75729	1.32006	1.71025	2.02081	2.21671	2.3786
	284.4	0.121418	0.26163	0.57481	0.75605	1.32045	1.71117	2.02083	2.21698	2.37885
	284.6	0.120315	0.26148	0.57561	0.75634	1.31976	1.71202	2.01966	2.21955	2.37848
	284.8	0.120905	0.26095	0.57613	0.75658	1.31922	1.71283	2.02116	2.21836	2.37843
	285	0.121042	0.26138	0.57536	0.75654	1.32095	1.71313	2.02209	2.21789	2.37944
	285.2	0.121558	0.26182	0.57543	0.75728	1.32254	1.7136	2.02251	2.21866	2.37997
	285.4	0.121003	0.26209	0.57456	0.7586	1.32204	1.71394	2.02291	2.21815	2.38051
	285.6	0.122267	0.26216	0.57425	0.7586	1.3225	1.71508	2.02449	2.21738	2.38082
	285.8	0.122267	0.26211	0.5745	0.75933	1.32374	1.71518	2.02398	2.22005	2.38072
	286	0.122431	0.26246	0.57591	0.75888	1.32232	1.71636	2.02339	2.22024	2.3807
	286.2	0.120687	0.26165	0.57621	0.75964	1.32229	1.71622	2.02387	2.22123	2.38082
	286.4	0.121075	0.26014	0.57609	0.75987	1.3237	1.71614	2.02366	2.22327	2.38158
	286.6	0.120291	0.26117	0.57632	0.76056	1.32462	1.71613	2.02575	2.22291	2.38226
	286.8	0.119773	0.26156	0.57683	0.76133	1.32439	1.71705	2.02492	2.22335	2.38441
	287	0.120377	0.26171	0.57603	0.76162	1.32512	1.71658	2.02496	2.22507	2.38641
	287.2	0.121629	0.26228	0.57623	0.76126	1.32588	1.71741	2.02507	2.22502	2.3878
	287.4	0.121068	0.26408	0.57677	0.76049	1.32548	1.71833	2.02631	2.22452	2.3877
	287.6	0.122544	0.26435	0.57575	0.76063	1.32522	1.71845	2.02523	2.22363	2.38807
	287.8	0.12286	0.26508	0.57622	0.76053	1.32464	1.71926	2.02757	2.22393	2.38767
	288	0.121199	0.26565	0.57669	0.76121	1.32629	1.72002	2.0279	2.22317	2.3866
	288.2	0.122076	0.26621	0.57685	0.76131	1.32645	1.71918	2.0282	2.22365	2.38604
	288.4	0.123309	0.26594	0.57722	0.76196	1.32632	1.71969	2.02765	2.22453	2.38609
	288.6	0.123293	0.26578	0.57837	0.76191	1.32662	1.71952	2.02755	2.22619	2.38668
	288.8	0.123148	0.2661	0.57829	0.76189	1.32742	1.71884	2.027	2.22639	2.38657
	289	0.123538	0.26557	0.57973	0.76165	1.32705	1.71871	2.02848	2.22673	2.38839
	289.2	0.123051	0.26615	0.57978	0.76209	1.32683	1.72154	2.02971	2.22741	2.38835
	289.4	0.122117	0.26596	0.58094	0.76218	1.32759	1.72047	2.0301	2.22771	2.388
	289.6	0.122786	0.26718	0.58099	0.76269	1.32878	1.72095	2.03047	2.22907	2.38867
	289.8	0.121879	0.26826	0.58161	0.76196	1.32964	1.72167	2.03196	2.22777	2.3885
	290	0.123072	0.26829	0.58089	0.76234	1.33117	1.72269	2.0327	2.22945	2.3881
	290.2	0.122529	0.2695	0.58091	0.76188	1.33119	1.72163	2.03238	2.22754	2.38915
	290.4	0.122604	0.27076	0.58056	0.762	1.33155	1.72258	2.03323	2.22856	2.3914
	290.6	0.121732	0.27002	0.58149	0.76287	1.33071	1.72366	2.03403	2.22819	2.39052
	290.8	0.121312	0.26948	0.58065	0.76459	1.33073	1.72375	2.03175	2.22916	2.3922
	291	0.120263	0.26893	0.58169	0.76482	1.33103	1.72396	2.03109	2.22841	2.39222
	291.2	0.120251	0.26722	0.58188	0.76589	1.33194	1.72472	2.03184	2.23027	2.39289
	291.4	0.121688	0.26736	0.58208	0.76635	1.33224	1.72406	2.03266	2.23043	2.39242
	291.6	0.121506	0.26648	0.58178	0.76595	1.33264	1.72444	2.03258	2.23006	2.39386
	291.8	0.123226	0.2658	0.58252	0.76512	1.33351	1.72415	2.03392	2.23033	2.3933
	292	0.123628	0.26638	0.58224	0.76635	1.33252	1.72458	2.0344	2.23099	2.39366
	292.2	0.123945	0.26781	0.58265	0.76645	1.33382	1.72523	2.03532	2.23159	2.39404
	292.4	0.122257	0.26735	0.58372	0.76714	1.33509	1.72668	2.03538	2.22996	2.39538
	292.6	0.121966	0.26773	0.58386	0.76768	1.33697	1.72645	2.03701	2.22966	2.3957
	292.8	0.122161	0.26724	0.5839	0.76773	1.33692	1.72823	2.03741	2.23054	2.39798
	293	0.120861	0.26736	0.58426	0.76743	1.33832	1.72772	2.03795	2.23057	2.39892
	293.2	0.121489	0.26629	0.58451	0.76736	1.33801	1.72678	2.03816	2.23119	2.39972
	293.4	0.122984	0.2671	0.58467	0.76731	1.33758	1.72822	2.03915	2.23365	2.3987
	293.6	0.122895	0.26725	0.58551	0.76829	1.33678	1.72886	2.03746	2.23396	2.39984
	293.8	0.122393	0.26936	0.58625	0.77012	1.33837	1.72922	2.03774	2.23452	2.39775
	294	0.123376	0.26984	0.58614	0.7698	1.33732	1.73024	2.03874	2.23505	2.397
	294.2	0.122947	0.26896	0.58661	0.77093	1.33837	1.73163	2.03901	2.236	2.39658
	294.4	0.121238	0.26913	0.58565	0.77178	1.33876	1.7312	2.03846	2.23643	2.39678
	294.6	0.122649	0.27005	0.58533	0.7701	1.33915	1.73223	2.04021	2.23761	2.39562
	294.8	0.12236	0.26817	0.58479	0.77044	1.3382	1.73249	2.04161	2.23691	2.3974
	295	0.122548	0.26782	0.58427	0.7712	1.33943	1.73259	2.04079	2.23832	2.39878
	295.2	0.122133	0.26982	0.58445	0.77088	1.33857	1.73257	2.04111	2.23708	2.39912
	295.4	0.123182	0.26875	0.58521	0.77002	1.3381	1.73242	2.04215	2.23774	2.39931
	295.6	0.122776	0.26925	0.58541	0.77115	1.33849	1.73181	2.04262	2.23766	2.39948
	295.8	0.125064	0.26967	0.58616	0.77181	1.33887	1.73231	2.0424	2.23852	2.39951
	296	0.124675	0.27014	0.58669	0.77176	1.33895	1.7317	2.04258	2.23731	2.39922
	296.2	0.12458	0.26894	0.58813	0.77189	1.33987	1.73355	2.04162	2.23779	2.39996
	296.4	0.124371	0.26939	0.58865	0.77314	1.34101	1.73369	2.04162	2.23686	2.40176
	296.6	0.124192	0.26963	0.58969	0.77356	1.34164	1.73565	2.04269	2.23905	2.40296
	296.8	0.122739	0.27057	0.59016	0.77254	1.34224	1.73489	2.04326	2.23931	2.4026
	297	0.124184	0.27152	0.59155	0.77371	1.34287	1.73643	2.04383	2.24118	2.40352
	297.2	0.12487	0.27218	0.59034	0.77353	1.34315	1.73567	2.04486	2.24194	2.40392
	297.4	0.123931	0.27228	0.58979	0.7733	1.34316	1.73665	2.04592	2.24254	2.40316
	297.6	0.123903	0.27188	0.58857	0.7736	1.34248	1.73585	2.0458	2.2418	2.40453
	297.8	0.123757	0.27265	0.58797	0.77309	1.34327	1.73694	2.04558	2.24378	2.40472
	298	0.12225	0.27135	0.58757	0.77214	1.34304	1.73716	2.04685	2.24193	2.40439
	298.2	0.121448	0.27263	0.58743	0.77368	1.34407	1.73711	2.04758	2.2426	2.40424
	298.4	0.124102	0.27249	0.58775	0.77486	1.34537	1.7378	2.04737	2.24246	2.40439
	298.6	0.123535	0.27245	0.58777	0.77538	1.34643	1.73792	2.04715	2.24299	2.403
	298.8	0.123254	0.27173	0.589	0.7767	1.34602	1.7379	2.04843	2.24254	2.40426
	299	0.123762	0.27271	0.58929	0.77798	1.34738	1.73852	2.04793	2.24517	2.40502
	299.2	0.124343	0.27145	0.58984	0.77791	1.34697	1.7389	2.04884	2.24429	2.40481
	299.4	0.122732	0.27285	0.59098	0.77856	1.34674	1.73923	2.04813	2.24531	2.40483
	299.6	0.123948	0.27276	0.59209	0.77851	1.34647	1.7398	2.04775	2.24547	2.4049
	299.8	0.124301	0.27307	0.59165	0.77796	1.34758	1.74	2.04682	2.24527	2.40451
	300	0.124821	0.27189	0.59171	0.77795	1.3482	1.74021	2.04853	2.24498	2.40483
	300.2	0.124645	0.27281	0.59308	0.77822	1.34933	1.74088	2.04791	2.24661	2.40498
	300.4	0.125021	0.27164	0.59318	0.77768	1.35006	1.7402	2.05091	2.24733	2.40557
	300.6	0.124663	0.27162	0.59355	0.77862	1.35171	1.73979	2.05171	2.24805	2.40758
	300.8	0.124695	0.27166	0.59382	0.78075	1.35226	1.74018	2.05405	2.24885	2.40905
	301	0.12462	0.27166	0.59489	0.78127	1.35193	1.73968	2.05357	2.24881	2.41045
	301.2	0.125854	0.27152	0.59436	0.78119	1.35133	1.74015	2.05466	2.24866	2.41083
	301.4	0.124523	0.27287	0.59429	0.78047	1.35256	1.7414	2.05397	2.24829	2.41158
	301.6	0.124849	0.27345	0.59408	0.77986	1.35242	1.74272	2.05505	2.24979	2.41088
	301.8	0.125503	0.27275	0.59494	0.77893	1.35296	1.74401	2.05361	2.25052	2.41063
	302	0.124974	0.27329	0.59486	0.77977	1.35321	1.74518	2.05302	2.25055	2.40918
	302.2	0.123577	0.27297	0.59434	0.78065	1.35363	1.74537	2.05262	2.2505	2.40945
	302.4	0.125977	0.27124	0.59436	0.7818	1.35264	1.74492	2.05336	2.25214	2.40827
	302.6	0.124569	0.27101	0.5945	0.78192	1.35356	1.74493	2.05276	2.25118	2.40731
	302.8	0.124047	0.27063	0.59443	0.78204	1.35289	1.74536	2.05405	2.25088	2.40827
	303	0.124561	0.27101	0.59477	0.78154	1.35326	1.74561	2.05559	2.25359	2.40862
	303.2	0.125806	0.27053	0.59493	0.78038	1.35396	1.7453	2.05532	2.25492	2.40918
	303.4	0.124901	0.27159	0.5952	0.7794	1.35463	1.74623	2.05446	2.25359	2.4104
	303.6	0.125504	0.27064	0.59605	0.78075	1.35403	1.74597	2.05622	2.25444	2.41255
	303.8	0.125763	0.27177	0.59734	0.78017	1.3547	1.74554	2.05597	2.25471	2.41076
	304	0.125575	0.27214	0.59654	0.78053	1.3551	1.74633	2.05625	2.253	2.41111
	304.2	0.124571	0.27256	0.59653	0.78148	1.35571	1.74826	2.05736	2.25247	2.41157
	304.4	0.123921	0.27106	0.59721	0.7822	1.35553	1.74967	2.05847	2.25536	2.41197
	304.6	0.123909	0.27276	0.59715	0.78237	1.35599	1.75129	2.05896	2.25447	2.4126
	304.8	0.124281	0.27161	0.59571	0.78362	1.35577	1.75204	2.05904	2.25455	2.41384
	305	0.12454	0.27224	0.59643	0.78214	1.35611	1.75179	2.06077	2.2549	2.41425
	305.2	0.12584	0.2734	0.59816	0.78267	1.35578	1.75042	2.06213	2.25557	2.41527
	305.4	0.126383	0.27425	0.59745	0.78296	1.35635	1.74907	2.06243	2.25429	2.41531
	305.6	0.127277	0.27263	0.5974	0.78397	1.35676	1.74902	2.06176	2.25684	2.41462
	305.8	0.126168	0.27361	0.59819	0.7838	1.35784	1.74919	2.06243	2.25729	2.41493
	306	0.126706	0.27221	0.59838	0.78608	1.35846	1.74879	2.06037	2.25861	2.41571
	306.2	0.127125	0.27141	0.59743	0.78648	1.35844	1.75096	2.0605	2.25982	2.4156
	306.4	0.128222	0.27295	0.59708	0.78608	1.35931	1.7514	2.06038	2.25961	2.41707
	306.6	0.12834	0.27393	0.59809	0.78533	1.3605	1.7511	2.06092	2.2583	2.41737
	306.8	0.128597	0.27412	0.59784	0.78609	1.36047	1.75092	2.06123	2.25945	2.4186
	307	0.128141	0.27505	0.59812	0.78591	1.35939	1.75192	2.06232	2.25885	2.4194
	307.2	0.127316	0.27627	0.59907	0.78585	1.36051	1.75143	2.06231	2.25964	2.41865
	307.4	0.125904	0.27559	0.60101	0.78617	1.36045	1.75279	2.06144	2.26059	2.41799
	307.6	0.125862	0.27595	0.60076	0.78564	1.36078	1.75322	2.0617	2.26058	2.4177
	307.8	0.125963	0.27564	0.60028	0.78564	1.36197	1.75501	2.0624	2.26057	2.41658
	308	0.125423	0.27576	0.60094	0.78739	1.36293	1.75479	2.06396	2.26199	2.4164
	308.2	0.125795	0.27514	0.60103	0.78795	1.36341	1.75507	2.06479	2.26097	2.41794
	308.4	0.124957	0.27482	0.60138	0.78787	1.36489	1.75543	2.06712	2.26153	2.41816
	308.6	0.12532	0.27411	0.60088	0.78877	1.36458	1.75673	2.06708	2.26194	2.41918
	308.8	0.126181	0.27501	0.60242	0.7889	1.36356	1.75539	2.0671	2.26292	2.41996
	309	0.126565	0.27516	0.60152	0.78703	1.36348	1.75642	2.06595	2.26257	2.41969
	309.2	0.12516	0.27513	0.6012	0.78726	1.36393	1.75696	2.0656	2.2628	2.42
	309.4	0.127404	0.27504	0.60053	0.78904	1.36272	1.75741	2.06607	2.26412	2.42027
	309.6	0.126764	0.27652	0.6013	0.79007	1.36245	1.75721	2.06648	2.26321	2.42067
	309.8	0.126024	0.27691	0.60059	0.78933	1.36246	1.7591	2.06698	2.2636	2.42133
	310	0.126126	0.2777	0.60207	0.78944	1.36366	1.75861	2.0689	2.26406	2.42226
	310.2	0.127103	0.27812	0.60244	0.78957	1.36308	1.75863	2.06935	2.26521	2.42145
	310.4	0.127088	0.27971	0.60315	0.78907	1.36434	1.75836	2.06835	2.26445	2.42169
	310.6	0.127952	0.27867	0.60338	0.78872	1.36422	1.75856	2.06909	2.26714	2.42206
	310.8	0.127485	0.27856	0.60366	0.79001	1.36585	1.75857	2.06923	2.26615	2.42296
	311	0.128081	0.27923	0.60327	0.7904	1.36661	1.75858	2.06878	2.26592	2.42293
	311.2	0.128826	0.27777	0.60321	0.7915	1.36683	1.75938	2.06894	2.26747	2.42363
	311.4	0.127998	0.277	0.60288	0.79275	1.36755	1.76003	2.07023	2.26801	2.42404
	311.6	0.128335	0.27706	0.60334	0.79303	1.36875	1.76049	2.07002	2.2661	2.42349
	311.8	0.128669	0.27739	0.60442	0.79251	1.36886	1.76061	2.07157	2.26716	2.42423
	312	0.127714	0.27522	0.60507	0.793	1.36933	1.76111	2.07197	2.26763	2.42432
	312.2	0.127324	0.27743	0.60587	0.79234	1.37091	1.76146	2.07327	2.26608	2.42492
	312.4	0.127073	0.27765	0.60591	0.79167	1.36996	1.76022	2.07319	2.26723	2.42554
	312.6	0.125505	0.27832	0.6054	0.79153	1.37151	1.76056	2.07513	2.26791	2.42657
	312.8	0.127208	0.27742	0.60514	0.79261	1.37201	1.76042	2.07451	2.26767	2.42522
	313	0.128405	0.27842	0.60537	0.79429	1.37094	1.76087	2.07434	2.26857	2.42632
	313.2	0.127823	0.27726	0.60548	0.79463	1.37193	1.76013	2.07462	2.26801	2.42566
	313.4	0.128097	0.27671	0.60461	0.79616	1.3719	1.76299	2.07542	2.26874	2.42584
	313.6	0.128501	0.2773	0.60579	0.79683	1.37175	1.76335	2.07524	2.2696	2.42585
	313.8	0.127007	0.27808	0.60639	0.79824	1.37219	1.76447	2.07533	2.2712	2.42627
	314	0.126253	0.27913	0.60715	0.79746	1.37456	1.76539	2.07543	2.27207	2.42589
	314.2	0.127211	0.27923	0.60746	0.79815	1.37268	1.76644	2.07483	2.27288	2.42685
	314.4	0.126742	0.27946	0.60938	0.79807	1.37336	1.7651	2.07583	2.27187	2.42681
	314.6	0.127001	0.27885	0.6084	0.7978	1.37321	1.76601	2.07506	2.27306	2.4278
	314.8	0.126441	0.27895	0.60871	0.79678	1.37305	1.76524	2.07609	2.27297	2.42818
	315	0.125471	0.2788	0.60839	0.79621	1.37129	1.76623	2.07576	2.27335	2.4281
	315.2	0.124745	0.27987	0.60847	0.79653	1.37257	1.766	2.07509	2.27587	2.42853
	315.4	0.124961	0.28171	0.60913	0.79646	1.37366	1.76665	2.07526	2.27511	2.43054
	315.6	0.124761	0.28202	0.61035	0.79801	1.37484	1.76614	2.07677	2.27529	2.42939
	315.8	0.126214	0.28243	0.6098	0.79834	1.37441	1.76701	2.07601	2.27408	2.42937
	316	0.127603	0.28213	0.60943	0.79958	1.37545	1.76722	2.07732	2.27277	2.43145
	316.2	0.127565	0.28169	0.60869	0.79946	1.37579	1.76745	2.07891	2.2714	2.4333
	316.4	0.128857	0.28034	0.60809	0.80017	1.37568	1.76867	2.07835	2.27185	2.43193
	316.6	0.128348	0.28021	0.60791	0.79903	1.37533	1.76917	2.07866	2.27153	2.43287
	316.8	0.127684	0.27884	0.60832	0.8001	1.37698	1.76925	2.07834	2.27171	2.43382
	317	0.127975	0.27911	0.60867	0.7993	1.37696	1.76907	2.08029	2.2729	2.4335
	317.2	0.127841	0.2794	0.60932	0.79982	1.37733	1.76981	2.08123	2.2741	2.43244
	317.4	0.126741	0.27953	0.60981	0.79893	1.37768	1.77002	2.0806	2.27552	2.43172
	317.6	0.128173	0.27921	0.61007	0.79981	1.37667	1.76997	2.0805	2.27602	2.43341
	317.8	0.128199	0.28042	0.61102	0.79981	1.37621	1.77117	2.08233	2.27669	2.43291
	318	0.127684	0.2802	0.61103	0.80076	1.37686	1.77186	2.08027	2.27633	2.43204
	318.2	0.127952	0.27932	0.61262	0.80078	1.37755	1.77329	2.07965	2.27671	2.43263
	318.4	0.12826	0.28016	0.61151	0.8019	1.37758	1.77353	2.08204	2.2772	2.43458
	318.6	0.127651	0.28099	0.61166	0.80171	1.37841	1.7745	2.08195	2.27717	2.43339
	318.8	0.12837	0.28078	0.61169	0.80047	1.3793	1.77403	2.08176	2.28002	2.43462
	319	0.129662	0.28189	0.61212	0.80109	1.38006	1.77427	2.08281	2.28101	2.43574
	319.2	0.130155	0.28301	0.61134	0.80187	1.37951	1.7729	2.08386	2.27961	2.43557
	319.4	0.130311	0.28191	0.61327	0.80172	1.38018	1.77281	2.08348	2.27909	2.43603
	319.6	0.130384	0.28161	0.6133	0.80153	1.38068	1.77326	2.08497	2.27997	2.43707
	319.8	0.130663	0.28271	0.6128	0.80285	1.38161	1.77409	2.08432	2.27883	2.43655
	320	-0.0024074	0.14302	0.52207	0.68754	1.23364	1.64913	1.92566	2.12184	2.26646
	320.2	0.00296617	0.14195	0.52174	0.69568	1.23316	1.65217	1.91797	2.12259	2.26496
	320.4	0.00604337	0.14147	0.51919	0.6932	1.23075	1.6522	1.91997	2.11945	2.26507
	320.6	0.00930857	0.14841	0.52025	0.69483	1.2264	1.64945	1.91549	2.11205	2.26166
	320.8	0.0107002	0.15039	0.52051	0.69465	1.22523	1.64887	1.91401	2.11458	2.26284
	321	0.0123733	0.15098	0.52114	0.69753	1.22358	1.64919	1.91067	2.11173	2.2605
	321.2	0.0133881	0.15323	0.52186	0.6978	1.22161	1.64792	1.90981	2.10943	2.25904
	321.4	0.0148302	0.15512	0.52265	0.69937	1.22042	1.64702	1.90773	2.10768	2.25713
	321.6	0.0152898	0.15543	0.52187	0.70064	1.21974	1.64701	1.90752	2.10654	2.25537
	321.8	0.0156643	0.15629	0.52142	0.70153	1.21917	1.6461	1.90652	2.1036	2.2531
	322	0.0183507	0.15735	0.52023	0.70162	1.21741	1.64544	1.90604	2.10222	2.25242
	322.2	0.0194482	0.15723	0.51998	0.70224	1.21656	1.64497	1.90587	2.10034	2.25181
	322.4	0.0200616	0.1584	0.52104	0.70288	1.21541	1.6438	1.9049	2.09916	2.25071
	322.6	0.0211629	0.15846	0.52143	0.70272	1.21487	1.64239	1.90275	2.0979	2.25055
	322.8	0.0226265	0.15917	0.52194	0.70293	1.2127	1.64221	1.90184	2.09716	2.24961
	323	0.0222002	0.15911	0.52241	0.7032	1.21229	1.64073	1.90154	2.09534	2.24798
	323.2	0.0228535	0.16045	0.52336	0.70243	1.21177	1.64096	1.90103	2.09319	2.2472
	323.4	0.023618	0.16016	0.52269	0.70222	1.21107	1.64043	1.90081	2.09241	2.24605
	323.6	0.0242331	0.16036	0.52365	0.70231	1.21076	1.64115	1.9012	2.09099	2.24558
	323.8	0.0253752	0.15977	0.52316	0.70318	1.21058	1.641	1.90118	2.08939	2.24522
	324	0.0259886	0.16051	0.52293	0.7039	1.21053	1.64094	1.90039	2.0892	2.246
	324.2	0.0266178	0.15991	0.52216	0.70496	1.20977	1.63992	1.89925	2.08925	2.24491
	324.4	0.0272065	0.15995	0.52234	0.7048	1.20935	1.64049	1.89849	2.08776	2.24534
	324.6	0.028558	0.1602	0.52197	0.70458	1.20766	1.63967	1.89748	2.088	2.24505
	324.8	0.0283552	0.16042	0.52258	0.70398	1.20804	1.63814	1.89602	2.08803	2.24521
	325	0.028761	0.16053	0.5231	0.70336	1.20729	1.63799	1.89612	2.08685	2.2439
	325.2	0.0288943	0.16008	0.52284	0.70378	1.2075	1.63707	1.89626	2.08633	2.24311
	325.4	0.0289867	0.16034	0.52196	0.70468	1.207	1.63734	1.89675	2.08521	2.24284
	325.6	0.0280686	0.16053	0.52234	0.70668	1.20763	1.63609	1.89597	2.08398	2.24122
	325.8	0.0281091	0.16068	0.52247	0.70671	1.20772	1.6367	1.89758	2.0829	2.23978
	326	0.0290348	0.16062	0.52319	0.70602	1.20767	1.63637	1.89695	2.08285	2.24016
	326.2	0.0301298	0.1604	0.52346	0.70598	1.20727	1.63696	1.89623	2.0815	2.23955
	326.4	0.0305299	0.15971	0.5244	0.70581	1.20667	1.63486	1.89521	2.08127	2.23746
	326.6	0.0321977	0.16011	0.52408	0.70393	1.20544	1.6359	1.896	2.08117	2.23781
	326.8	0.0332127	0.15932	0.52433	0.70415	1.20465	1.63482	1.895	2.08083	2.23786
	327	0.0338479	0.15901	0.52299	0.70426	1.20428	1.63475	1.89545	2.08007	2.23648
	327.2	0.0339103	0.15969	0.52313	0.70382	1.20369	1.63482	1.89473	2.08047	2.23632
	327.4	0.0339729	0.16063	0.52384	0.70306	1.20362	1.6355	1.89483	2.08114	2.23696
	327.6	0.0341576	0.16019	0.52361	0.70423	1.20402	1.63469	1.89462	2.07979	2.23607
	327.8	0.0341795	0.16038	0.52412	0.7041	1.20435	1.63462	1.89441	2.08078	2.23532
	328	0.0346684	0.1605	0.52556	0.70495	1.20381	1.63459	1.89307	2.08046	2.23629
	328.2	0.0351776	0.16039	0.52604	0.70561	1.20262	1.63273	1.89343	2.07974	2.23613
	328.4	0.0358344	0.15948	0.52469	0.70561	1.20176	1.63236	1.89311	2.07884	2.2357
	328.6	0.0352505	0.16019	0.52563	0.70503	1.20121	1.63192	1.89312	2.0783	2.23547
	328.8	0.0358531	0.16087	0.52466	0.70476	1.20003	1.63238	1.89351	2.07654	2.23546
	329	0.0358332	0.1605	0.52394	0.70511	1.19968	1.63192	1.89434	2.07653	2.23367
	329.2	0.0368051	0.16075	0.52354	0.70445	1.20141	1.63209	1.89466	2.07563	2.23399
	329.4	0.0374118	0.16197	0.52334	0.70491	1.20225	1.63143	1.89539	2.0751	2.23373
	329.6	0.0388413	0.16124	0.5232	0.7049	1.20208	1.6307	1.89508	2.07605	2.23384
	329.8	0.0402934	0.16099	0.52378	0.70542	1.2026	1.63075	1.89435	2.07497	2.23305
	330	0.0403734	0.16165	0.52304	0.70462	1.2028	1.63087	1.89391	2.07383	2.23284
	330.2	0.0400815	0.16139	0.52293	0.7043	1.20097	1.63126	1.89363	2.07391	2.23207
	330.4	0.0395598	0.16087	0.52388	0.70432	1.20114	1.63125	1.8928	2.07293	2.23114
	330.6	0.0392667	0.16105	0.52332	0.70318	1.20075	1.63096	1.89324	2.07214	2.22981
	330.8	0.0384454	0.16156	0.52374	0.70303	1.19983	1.63026	1.89384	2.0721	2.2299
	331	0.0388625	0.16178	0.52494	0.70277	1.1996	1.63096	1.89317	2.07211	2.22898
	331.2	0.0380357	0.16262	0.52526	0.70249	1.19955	1.63054	1.89184	2.0723	2.22843
	331.4	0.0395362	0.16322	0.52614	0.7027	1.19936	1.62946	1.89207	2.07166	2.22907
	331.6	0.0397933	0.16337	0.52686	0.704	1.20021	1.62948	1.89093	2.07061	2.22928
	331.8	0.0391955	0.16278	0.52622	0.70312	1.20076	1.62904	1.88994	2.07082	2.22948
	332	0.0397938	0.16234	0.52683	0.70386	1.20042	1.62834	1.89053	2.07	2.22955
	332.2	0.0406272	0.16221	0.52718	0.7044	1.20119	1.62866	1.89077	2.06957	2.2296
	332.4	0.0412123	0.16194	0.52512	0.7043	1.20094	1.62877	1.89046	2.06966	2.22857
	332.6	0.041235	0.1615	0.52544	0.70377	1.20021	1.62901	1.89049	2.06915	2.22678
	332.8	0.0418076	0.16182	0.52527	0.7047	1.20076	1.62927	1.88991	2.0683	2.22533
	333	0.04196	0.16309	0.52348	0.70389	1.20061	1.62864	1.89031	2.06788	2.22464
	333.2	0.0422777	0.16285	0.52298	0.70408	1.20024	1.62819	1.89029	2.06677	2.22349
	333.4	0.0416729	0.1629	0.52301	0.70248	1.20022	1.62873	1.8894	2.06626	2.22373
	333.6	0.04157	0.16323	0.52235	0.70293	1.20066	1.62754	1.88974	2.06504	2.22464
	333.8	0.0414094	0.16317	0.52245	0.70255	1.19929	1.62771	1.88923	2.06451	2.22502
	334	0.0413383	0.16207	0.52275	0.70265	1.19926	1.62692	1.88895	2.06345	2.22519
	334.2	0.0410272	0.16216	0.52202	0.70298	1.19882	1.62681	1.88877	2.06315	2.2246
	334.4	0.0411007	0.1616	0.52269	0.704	1.19752	1.62673	1.88935	2.06317	2.22433
	334.6	0.0413281	0.16198	0.52228	0.70376	1.19659	1.62732	1.88851	2.06387	2.22363
	334.8	0.0425672	0.16189	0.52239	0.7037	1.19626	1.62563	1.88874	2.06418	2.22234
	335	0.0422177	0.16215	0.52201	0.70449	1.19626	1.62593	1.88752	2.0647	2.22192
	335.2	0.0432191	0.16206	0.52192	0.70331	1.19688	1.62396	1.88661	2.06512	2.22161
	335.4	0.0432325	0.16223	0.52208	0.70357	1.19739	1.62402	1.88595	2.06438	2.22063
	335.6	0.0430813	0.16242	0.52237	0.7033	1.19794	1.62319	1.88545	2.06349	2.22083
	335.8	0.042637	0.16278	0.52253	0.70355	1.199	1.62369	1.88565	2.06241	2.22152
	336	0.0435535	0.16305	0.52273	0.70305	1.19938	1.62266	1.88508	2.06159	2.22176
	336.2	0.0431843	0.16314	0.52288	0.70342	1.19819	1.62352	1.88541	2.06084	2.22117
	336.4	0.0435457	0.16328	0.52204	0.7034	1.19792	1.62316	1.88513	2.06041	2.22157
	336.6	0.0438408	0.16256	0.5209	0.70395	1.19722	1.6234	1.88495	2.06165	2.22101
	336.8	0.0441298	0.16229	0.52031	0.70457	1.1962	1.62357	1.88467	2.06118	2.22124
	337	0.0435111	0.16217	0.52081	0.70473	1.19498	1.62409	1.88523	2.06137	2.22032
	337.2	0.0439427	0.16233	0.52107	0.70473	1.19526	1.62397	1.88505	2.06057	2.221
	337.4	0.0427267	0.1624	0.52162	0.7038	1.19513	1.6238	1.88429	2.06048	2.21976
	337.6	0.0441019	0.16253	0.52309	0.70314	1.19463	1.62482	1.88446	2.05905	2.21951
	337.8	0.0447691	0.16292	0.5225	0.70223	1.19464	1.62358	1.88307	2.05871	2.21798
	338	0.0444761	0.16287	0.52239	0.70181	1.19496	1.62317	1.88107	2.0585	2.21788
	338.2	0.0440996	0.16298	0.52202	0.70196	1.19554	1.62346	1.88091	2.05868	2.21629
	338.4	0.0453077	0.16269	0.52193	0.70171	1.19585	1.62233	1.88096	2.05824	2.21617
	338.6	0.0445642	0.16274	0.52072	0.70183	1.19649	1.62064	1.8801	2.05765	2.21573
	338.8	0.0442259	0.1624	0.52084	0.70184	1.19575	1.62102	1.88132	2.05781	2.21601
	339	0.0456034	0.16337	0.52052	0.70185	1.1945	1.6205	1.88245	2.05721	2.21553
	339.2	0.0455786	0.16257	0.52102	0.70168	1.19309	1.61985	1.8808	2.05604	2.21641
	339.4	0.0453686	0.16354	0.52066	0.70293	1.1928	1.61952	1.88051	2.0556	2.21556
	339.6	0.0455291	0.16428	0.52086	0.70253	1.19231	1.61948	1.88025	2.05593	2.21554
	339.8	0.046527	0.163	0.5213	0.70268	1.19222	1.61873	1.87947	2.05587	2.21506
	340	0.0456657	0.16258	0.5216	0.70268	1.19274	1.61845	1.87854	2.05434	2.21547
	340.2	0.0463827	0.16201	0.52099	0.70259	1.19318	1.61842	1.88001	2.05571	2.21412
	340.4	0.04645	0.16161	0.52105	0.70165	1.19305	1.61783	1.87864	2.05512	2.21463
	340.6	0.046515	0.16035	0.52191	0.70177	1.19292	1.61774	1.87904	2.05404	2.21445
	340.8	0.0459776	0.16119	0.52251	0.70148	1.19339	1.61797	1.87869	2.05429	2.21424
	341	0.0465383	0.16097	0.52193	0.70096	1.19338	1.61868	1.87879	2.05542	2.21286
	341.2	0.0461838	0.16219	0.52187	0.70155	1.19313	1.61718	1.87763	2.0544	2.21266
	341.4	0.0465753	0.16147	0.5214	0.70177	1.19344	1.61767	1.8801	2.05362	2.21268
	341.6	0.0473484	0.16208	0.52101	0.70201	1.19311	1.61712	1.87976	2.05331	2.21167
	341.8	0.0477928	0.16212	0.52051	0.70215	1.19262	1.61724	1.88079	2.05147	2.21152
	342	0.0479815	0.16165	0.5216	0.70343	1.19211	1.61661	1.88073	2.05017	2.21109
	342.2	0.0492052	0.16233	0.52204	0.70222	1.19181	1.61715	1.8818	2.05032	2.21091
	342.4	0.0490971	0.16205	0.52291	0.70196	1.19058	1.618	1.88025	2.05151	2.21037
	342.6	0.0475531	0.16222	0.52286	0.70211	1.19083	1.61835	1.88005	2.05075	2.21072
	342.8	0.047	0.16193	0.52314	0.70253	1.19079	1.61807	1.87935	2.05212	2.21085
	343	0.0464607	0.16118	0.52277	0.70148	1.19093	1.61672	1.87912	2.05227	2.21165
	343.2	0.0457186	0.16019	0.52269	0.7019	1.1915	1.6174	1.87709	2.05085	2.21146
	343.4	0.045602	0.16142	0.52319	0.70148	1.19203	1.61579	1.87748	2.04923	2.21099
	343.6	0.0468707	0.16145	0.52343	0.70098	1.19163	1.61576	1.87729	2.05032	2.2105
	343.8	0.0472064	0.16176	0.52358	0.70048	1.19172	1.61595	1.87614	2.05056	2.20883
	344	0.0480943	0.16201	0.52324	0.70002	1.19223	1.61624	1.87651	2.05016	2.20735
	344.2	0.0483007	0.16273	0.52313	0.70025	1.19036	1.61594	1.87669	2.04952	2.20735
	344.4	0.0488517	0.16192	0.52205	0.69986	1.19076	1.61662	1.87687	2.04982	2.2063
	344.6	0.0495868	0.16153	0.52178	0.69989	1.19	1.61629	1.87588	2.04956	2.20589
	344.8	0.0502377	0.16129	0.52064	0.69955	1.18982	1.61583	1.87603	2.04744	2.20689
	345	0.0497743	0.162	0.52075	0.70056	1.18888	1.61522	1.87461	2.0478	2.20698
	345.2	0.0497013	0.16094	0.52041	0.70074	1.18953	1.61465	1.87477	2.04888	2.2062
	345.4	0.0495594	0.16042	0.52051	0.70077	1.18852	1.61389	1.87375	2.04886	2.20699
	345.6	0.0491795	0.16045	0.52002	0.70123	1.18884	1.61399	1.87382	2.04926	2.20722
	345.8	0.0481595	0.16016	0.52017	0.70117	1.18861	1.61303	1.87274	2.04905	2.20679
	346	0.0481989	0.15932	0.52042	0.70021	1.18875	1.6134	1.87324	2.04832	2.20646
	346.2	0.0487143	0.16038	0.52039	0.69977	1.1883	1.61295	1.8727	2.04754	2.20691
	346.4	0.0485478	0.16102	0.52007	0.70088	1.18886	1.61335	1.87263	2.04667	2.20668
	346.6	0.0469996	0.16143	0.51997	0.70072	1.18976	1.61225	1.87277	2.04632	2.20656
	346.8	0.0482466	0.16211	0.52085	0.70054	1.18902	1.61303	1.87388	2.04567	2.20533
	347	0.0484531	0.16314	0.52055	0.70186	1.18927	1.61209	1.87326	2.04531	2.20558
	347.2	0.0484615	0.1623	0.52033	0.70119	1.19039	1.61295	1.87356	2.04513	2.20442
	347.4	0.0489201	0.16237	0.52049	0.70094	1.18882	1.61273	1.87368	2.04488	2.2034
	347.6	0.0502849	0.16216	0.52062	0.70076	1.18927	1.61234	1.87373	2.04313	2.20181
	347.8	0.0513389	0.16264	0.51949	0.70179	1.19049	1.6113	1.87301	2.04436	2.20135
	348	0.0516379	0.16228	0.51924	0.70079	1.1906	1.61148	1.87286	2.04414	2.20102
	348.2	0.0513316	0.16263	0.51888	0.70212	1.18995	1.61158	1.87172	2.04339	2.20134
	348.4	0.0518594	0.16301	0.51938	0.70195	1.18991	1.61105	1.87112	2.04357	2.2011
	348.6	0.0509981	0.16371	0.51987	0.70097	1.18747	1.61135	1.87112	2.04353	2.20202
	348.8	0.0500267	0.16311	0.51995	0.70024	1.18598	1.61155	1.87213	2.04342	2.20205
	349	0.0497887	0.16245	0.52017	0.6994	1.18622	1.61234	1.87247	2.04274	2.20202
	349.2	0.0502997	0.16204	0.52107	0.6983	1.18571	1.6109	1.87292	2.04205	2.20101
	349.4	0.0503052	0.16135	0.52092	0.69681	1.18531	1.61015	1.87268	2.04131	2.20186
	349.6	0.0519115	0.16116	0.52028	0.6974	1.18542	1.61007	1.87255	2.0408	2.20102
	349.8	0.0517831	0.16144	0.52035	0.69706	1.18634	1.60974	1.8714	2.03944	2.20092
	350	0.0524827	0.16173	0.51993	0.69777	1.18624	1.60906	1.87108	2.03995	2.20069
	350.2	0.0524006	0.16232	0.5194	0.69819	1.18609	1.60918	1.87049	2.04026	2.20136
	350.4	0.0529308	0.16246	0.51862	0.70003	1.18725	1.60901	1.87064	2.04032	2.20037
	350.6	0.0523867	0.16196	0.51841	0.70025	1.18736	1.61011	1.86937	2.04119	2.19998
	350.8	0.0522428	0.16194	0.51856	0.69994	1.18636	1.61101	1.86872	2.04196	2.19942
	351	0.0520778	0.16244	0.51884	0.69985	1.18536	1.61019	1.86894	2.04071	2.19824
	351.2	0.0521813	0.16223	0.51867	0.69975	1.18558	1.61005	1.86908	2.03993	2.1973
	351.4	0.0514733	0.16265	0.5185	0.69903	1.18486	1.61084	1.86807	2.03952	2.19661
	351.6	0.0516567	0.16192	0.51848	0.69844	1.18543	1.60936	1.86793	2.03893	2.19746
	351.8	0.0518081	0.16227	0.51869	0.69887	1.18547	1.60801	1.86838	2.03786	2.19722
	352	0.0510708	0.16268	0.51857	0.69907	1.1856	1.60884	1.86769	2.03773	2.19704
	352.2	0.0508145	0.16097	0.51856	0.69843	1.18502	1.60813	1.8674	2.03793	2.19638
	352.4	0.0498816	0.16162	0.51872	0.69781	1.18453	1.60859	1.86826	2.03759	2.19612
	352.6	0.0500514	0.16238	0.51907	0.69819	1.18342	1.60896	1.86855	2.03706	2.19513
	352.8	0.0502698	0.16124	0.5193	0.69844	1.18329	1.6091	1.86828	2.03662	2.19561
	353	0.0511293	0.16013	0.51955	0.69825	1.18247	1.60888	1.86757	2.03741	2.19637
	353.2	0.0513782	0.16127	0.51941	0.69757	1.18288	1.60845	1.86842	2.03666	2.19658
	353.4	0.0527149	0.16034	0.52071	0.69895	1.18224	1.60837	1.86838	2.03651	2.19544
	353.6	0.0523217	0.1604	0.52148	0.69912	1.18349	1.60862	1.8675	2.03594	2.19585
	353.8	0.051853	0.16085	0.5201	0.69936	1.18377	1.60763	1.86796	2.03533	2.19468
	354	0.0508786	0.16191	0.51933	0.69898	1.18385	1.60743	1.86793	2.03416	2.19309
	354.2	0.0516555	0.16229	0.51991	0.69908	1.18284	1.60895	1.86653	2.03446	2.19304
	354.4	0.0509659	0.16227	0.51811	0.69714	1.18406	1.60747	1.86588	2.03511	2.19404
	354.6	0.0503808	0.16085	0.51767	0.69643	1.18319	1.60611	1.866	2.03553	2.19304
	354.8	0.0511953	0.16063	0.51756	0.69613	1.1827	1.60774	1.86572	2.03658	2.19411
	355	0.0521118	0.1604	0.51746	0.69652	1.18296	1.60722	1.86621	2.03642	2.19455
	355.2	0.0515302	0.16085	0.51727	0.69764	1.18365	1.60642	1.86735	2.03521	2.19416
	355.4	0.0515107	0.1606	0.51801	0.69754	1.18278	1.60694	1.86821	2.03429	2.19285
	355.6	0.0523268	0.16165	0.51809	0.69824	1.18186	1.60704	1.86883	2.03361	2.19302
	355.8	0.0516646	0.1618	0.51891	0.69782	1.18237	1.60637	1.86721	2.03262	2.19207
	356	0.0516646	0.16092	0.51905	0.6974	1.18231	1.60642	1.86668	2.03337	2.19242
	356.2	0.0519201	0.16053	0.5189	0.69682	1.18253	1.60608	1.86634	2.0338	2.19246
	356.4	0.0523206	0.15989	0.51874	0.69758	1.18248	1.60554	1.86521	2.03292	2.19274
	356.6	0.0521977	0.15933	0.519	0.69668	1.18265	1.60444	1.86499	2.03234	2.19188
	356.8	0.0519612	0.15948	0.51841	0.69662	1.18221	1.6043	1.86526	2.03207	2.19171
	357	0.0520382	0.15976	0.51834	0.69679	1.18247	1.60366	1.8657	2.03192	2.19077
	357.2	0.0515909	0.15929	0.51827	0.69624	1.18163	1.60392	1.86524	2.03118	2.19049
	357.4	0.0511868	0.1598	0.51809	0.69693	1.18192	1.60449	1.86471	2.03124	2.19129
	357.6	0.0515182	0.16027	0.51777	0.69649	1.18187	1.60556	1.86396	2.03084	2.19147
	357.8	0.0516046	0.16047	0.519	0.69641	1.1804	1.60536	1.86518	2.03105	2.19087
	358	0.050585	0.1614	0.51917	0.69628	1.17983	1.60545	1.86429	2.03005	2.18987
	358.2	0.0505844	0.16128	0.51907	0.69695	1.17986	1.60466	1.86328	2.03059	2.1899
	358.4	0.051557	0.16159	0.51864	0.6964	1.18001	1.60412	1.86381	2.03125	2.18889
	358.6	0.0516814	0.16113	0.51853	0.6968	1.18007	1.60426	1.86344	2.0321	2.18853
	358.8	0.052525	0.16117	0.51763	0.69607	1.18073	1.60388	1.86309	2.03175	2.18809
	359	0.0535412	0.1606	0.51738	0.69539	1.18123	1.6039	1.86212	2.03122	2.18813
	359.2	0.0541546	0.1607	0.5185	0.69532	1.18132	1.60324	1.86262	2.03059	2.18827
	359.4	0.0546954	0.16065	0.51829	0.69502	1.18119	1.6014	1.86165	2.02952	2.18911
	359.6	0.0544516	0.16132	0.51676	0.69569	1.18132	1.60175	1.86226	2.02919	2.18871
	359.8	0.0546548	0.16138	0.51675	0.69591	1.18153	1.60135	1.86106	2.02897	2.189
	360	0.0542326	0.16054	0.51753	0.69607	1.181	1.60134	1.86189	2.03016	2.18938
	360.2	0.0545144	0.16055	0.51634	0.69466	1.18104	1.60221	1.86043	2.0301	2.18798
	360.4	0.0537237	0.16099	0.51647	0.69544	1.18094	1.60379	1.86128	2.03031	2.18627
	360.6	0.0537599	0.16106	0.51728	0.69452	1.18036	1.60223	1.86	2.0293	2.18581
	360.8	0.0536234	0.1603	0.51792	0.69525	1.17995	1.60193	1.86076	2.02943	2.18472
	361	0.0539276	0.16102	0.51651	0.69636	1.17959	1.60069	1.86061	2.0285	2.1843
	361.2	0.0529112	0.16141	0.51583	0.69749	1.17929	1.59972	1.86207	2.02863	2.18523
	361.4	0.0535623	0.1613	0.51722	0.69728	1.17932	1.59975	1.86107	2.02811	2.1851
	361.6	0.0548212	0.16166	0.51782	0.69657	1.17781	1.60075	1.8612	2.02812	2.18542
	361.8	0.0544186	0.16221	0.51754	0.6961	1.17824	1.60081	1.86083	2.02747	2.18663
	362	0.0549314	0.16234	0.51881	0.69492	1.17781	1.60175	1.86063	2.02657	2.18573
	362.2	0.054476	0.16212	0.51991	0.69496	1.17713	1.60144	1.86055	2.02632	2.18434
	362.4	0.0532838	0.16248	0.51883	0.69438	1.1768	1.6016	1.86103	2.0261	2.18347
	362.6	0.0525648	0.16226	0.51856	0.69495	1.17861	1.60221	1.86281	2.02558	2.18217
	362.8	0.052946	0.16258	0.51849	0.69452	1.17923	1.60199	1.86189	2.02554	2.18006
	363	0.0518895	0.16203	0.51731	0.69418	1.17891	1.60137	1.86118	2.02637	2.18042
	363.2	0.0528088	0.16307	0.51696	0.69422	1.17961	1.60157	1.86008	2.02548	2.18062
	363.4	0.0537696	0.16218	0.51686	0.69443	1.17964	1.6003	1.86014	2.0254	2.18055
	363.6	0.0531622	0.1619	0.51754	0.69548	1.17954	1.59977	1.85892	2.02568	2.18123
	363.8	0.0530689	0.16161	0.51613	0.69609	1.17836	1.59997	1.8594	2.02528	2.18323
	364	0.0541957	0.16173	0.51745	0.69664	1.17955	1.60044	1.85997	2.02434	2.18298
	364.2	0.0542617	0.16066	0.51708	0.69611	1.18001	1.60026	1.86038	2.02449	2.1818
	364.4	0.0541379	0.16071	0.51758	0.69611	1.17911	1.59999	1.85849	2.02437	2.18214
	364.6	0.0543908	0.15935	0.51629	0.69505	1.17834	1.59938	1.85773	2.0244	2.18325
	364.8	0.0532398	0.159	0.51718	0.69463	1.17905	1.59946	1.85705	2.02418	2.1821
	365	0.0536075	0.15995	0.51609	0.69342	1.17812	1.59963	1.85656	2.0239	2.1823
	365.2	0.0538503	0.15947	0.51615	0.69372	1.17773	1.59977	1.85669	2.02324	2.18245
	365.4	0.0533884	0.15957	0.51563	0.69336	1.17736	1.59973	1.85734	2.02246	2.18277
	365.6	0.0533948	0.16157	0.51717	0.69346	1.17757	1.5994	1.85797	2.022	2.18193
	365.8	0.0535765	0.16138	0.51623	0.69206	1.17634	1.59862	1.85802	2.02182	2.1809
	366	0.0526245	0.16052	0.51638	0.69277	1.17629	1.59832	1.8572	2.02171	2.18119
	366.2	0.0520505	0.16057	0.51713	0.69267	1.17517	1.5985	1.85653	2.02304	2.18163
	366.4	0.0527492	0.16122	0.51709	0.69283	1.17679	1.59847	1.85619	2.02315	2.18059
	366.6	0.052725	0.16099	0.51594	0.69342	1.17687	1.59864	1.85555	2.02166	2.17981
	366.8	0.0542285	0.1612	0.51699	0.69484	1.17769	1.59871	1.85574	2.02165	2.18
	367	0.0544117	0.16104	0.51746	0.69486	1.17721	1.59755	1.8566	2.02119	2.17872
	367.2	0.0543645	0.16111	0.51715	0.69433	1.17751	1.59742	1.85625	2.0204	2.17799
	367.4	0.0535033	0.16148	0.51731	0.69465	1.17725	1.59753	1.85608	2.01962	2.17818
	367.6	0.0534071	0.16102	0.51737	0.69433	1.1769	1.59702	1.85522	2.02109	2.17808
	367.8	0.0522446	0.16111	0.51701	0.69329	1.17698	1.59766	1.85299	2.02028	2.17767
	368	0.0524767	0.16153	0.51695	0.6932	1.17722	1.59759	1.85265	2.02007	2.17791
	368.2	0.053178	0.16138	0.51623	0.69379	1.17715	1.59664	1.85218	2.02021	2.17787
	368.4	0.0543198	0.16099	0.51655	0.69326	1.1765	1.5971	1.85193	2.02069	2.17841
	368.6	0.0542002	0.16029	0.51672	0.6922	1.17606	1.59674	1.85171	2.02038	2.17751
	368.8	0.0546989	0.16073	0.51689	0.69261	1.17611	1.59601	1.85258	2.02054	2.17777
	369	0.0537072	0.16003	0.51714	0.69275	1.17643	1.59734	1.85232	2.02113	2.1765
	369.2	0.0533345	0.16061	0.51764	0.69173	1.17583	1.59756	1.85295	2.02066	2.1767
	369.4	0.0527056	0.15971	0.51768	0.69198	1.17562	1.59803	1.85377	2.02147	2.17505
	369.6	0.0530604	0.16028	0.51762	0.69218	1.17653	1.59844	1.85441	2.02023	2.17501
	369.8	0.0532508	0.16021	0.5175	0.69271	1.17551	1.59859	1.85421	2.02049	2.17461
	370	0.0548855	0.16056	0.51762	0.69328	1.17499	1.59768	1.85469	2.01971	2.17575
	370.2	0.0550232	0.16119	0.51658	0.69275	1.17567	1.59781	1.85432	2.01961	2.17487
	370.4	0.0552789	0.16226	0.51578	0.69237	1.17537	1.59691	1.85407	2.01942	2.17493
	370.6	0.0553308	0.16259	0.51598	0.69291	1.17428	1.59551	1.85356	2.01934	2.1756
	370.8	0.0550209	0.16296	0.51557	0.69211	1.17332	1.59493	1.85419	2.01837	2.17506
	371	0.0548974	0.16354	0.51431	0.69173	1.17266	1.59554	1.85325	2.01782	2.17439
	371.2	0.0548987	0.16239	0.51462	0.69365	1.17177	1.59568	1.85321	2.01843	2.17481
	371.4	0.0552314	0.16218	0.51544	0.69293	1.17244	1.59494	1.85292	2.01669	2.17503
	371.6	0.05479	0.16251	0.51473	0.69263	1.17303	1.59528	1.85237	2.01715	2.1745
	371.8	0.0553392	0.16191	0.51543	0.69267	1.17419	1.59561	1.85181	2.01678	2.17531
	372	0.0545819	0.16135	0.51587	0.69168	1.17522	1.59483	1.85147	2.0172	2.17466
	372.2	0.0551008	0.16161	0.51714	0.69086	1.17554	1.59444	1.85087	2.01641	2.1739
	372.4	0.0547477	0.16087	0.51648	0.69144	1.17528	1.59447	1.84968	2.01541	2.17375
	372.6	0.054675	0.16041	0.5172	0.69184	1.17479	1.59569	1.8502	2.01611	2.17305
	372.8	0.0547398	0.16013	0.51701	0.69238	1.1746	1.59429	1.8496	2.01644	2.17141
	373	0.0546103	0.15954	0.51695	0.69262	1.17481	1.59448	1.85037	2.01494	2.17177
	373.2	0.054255	0.15974	0.51524	0.69277	1.17412	1.59275	1.85024	2.01422	2.1722
	373.4	0.05392	0.15925	0.51523	0.69221	1.17448	1.59334	1.85059	2.01523	2.17125
	373.6	0.0538888	0.15871	0.51473	0.69199	1.17498	1.59202	1.85096	2.01417	2.17221
	373.8	0.0534912	0.15998	0.5145	0.69174	1.17447	1.59305	1.85177	2.0131	2.17214
	374	0.0541005	0.16072	0.5141	0.69175	1.17363	1.59228	1.85093	2.01402	2.17172
	374.2	0.0539092	0.16168	0.51483	0.69173	1.17378	1.59398	1.85082	2.01344	2.17174
	374.4	0.0529996	0.16207	0.51506	0.69225	1.17244	1.59348	1.85159	2.01323	2.17196
	374.6	0.0539204	0.16264	0.51496	0.69233	1.17322	1.59387	1.85116	2.01351	2.17041
	374.8	0.054159	0.16153	0.51463	0.69267	1.17354	1.59322	1.85107	2.01417	2.17058
	375	0.0543939	0.16204	0.51468	0.69218	1.17494	1.59331	1.85092	2.01331	2.17034
	375.2	0.0551782	0.16117	0.51487	0.69163	1.17429	1.59355	1.85026	2.01382	2.16898
	375.4	0.0561725	0.16185	0.51475	0.69109	1.17497	1.59354	1.84906	2.0138	2.16826
	375.6	0.0549924	0.16159	0.51469	0.69032	1.17371	1.59313	1.84887	2.01333	2.16837
	375.8	0.0554359	0.16181	0.51561	0.68959	1.17429	1.59326	1.8484	2.01268	2.16848
	376	0.05631	0.16172	0.51377	0.68981	1.1725	1.59354	1.84824	2.01329	2.1674
	376.2	0.0551083	0.16126	0.51383	0.6902	1.17319	1.59344	1.84833	2.01192	2.1675
	376.4	0.0552528	0.16093	0.51303	0.69064	1.17214	1.59319	1.84816	2.01117	2.16783
	376.6	0.0561116	0.16142	0.51396	0.69072	1.1723	1.59441	1.8484	2.01094	2.16804
	376.8	0.0565507	0.16223	0.51291	0.69139	1.17179	1.59405	1.84859	2.01053	2.16794
	377	0.0555708	0.16073	0.51474	0.69222	1.17251	1.59412	1.84895	2.00983	2.16885
	377.2	0.0563105	0.16096	0.51359	0.69242	1.17274	1.59276	1.84827	2.01021	2.16779
	377.4	0.0559632	0.16101	0.51398	0.69235	1.17354	1.59319	1.84835	2.01024	2.16814
	377.6	0.0559907	0.16069	0.5127	0.69282	1.17298	1.5909	1.84712	2.01002	2.16633
	377.8	0.0549172	0.1604	0.51284	0.69317	1.17222	1.59103	1.84579	2.01052	2.16529
	378	0.0542439	0.16145	0.51359	0.69239	1.17166	1.59065	1.84535	2.01042	2.1642
	378.2	0.0545969	0.16207	0.51332	0.69125	1.17191	1.58968	1.84602	2.01096	2.16496
	378.4	0.0551807	0.16135	0.51461	0.6904	1.17098	1.58925	1.84657	2.01131	2.1642
	378.6	0.055722	0.16051	0.51485	0.69011	1.17216	1.58977	1.84685	2.01107	2.16534
	378.8	0.0561421	0.16132	0.51481	0.68878	1.17197	1.58958	1.8471	2.01163	2.16614
	379	0.0564555	0.16098	0.51411	0.68889	1.17171	1.58946	1.84697	2.01236	2.16638
	379.2	0.0548953	0.16077	0.51507	0.68981	1.17081	1.59113	1.84718	2.01155	2.16663
	379.4	0.0549858	0.16119	0.51353	0.69011	1.17112	1.59024	1.84676	2.01102	2.16712
	379.6	0.0539632	0.1613	0.51404	0.68898	1.17011	1.59101	1.84574	2.01141	2.16625
	379.8	0.0527891	0.15977	0.51439	0.68972	1.17105	1.59117	1.8454	2.01066	2.16602
	380	0.0525992	0.16064	0.51424	0.69015	1.17087	1.59104	1.8454	2.00969	2.16507
	380.2	0.0532911	0.16028	0.51451	0.68909	1.17122	1.59037	1.84509	2.00967	2.1645
	380.4	0.0530633	0.16076	0.51541	0.68889	1.17161	1.5913	1.84459	2.00949	2.16358
	380.6	0.0541772	0.1617	0.51561	0.68971	1.17158	1.59063	1.84494	2.00842	2.16319
	380.8	0.054766	0.16187	0.5154	0.68864	1.17076	1.59019	1.84483	2.00862	2.16214
	381	0.0553247	0.16094	0.51485	0.68845	1.17152	1.59	1.8443	2.00848	2.16304
	381.2	0.0556692	0.16109	0.51517	0.68898	1.17102	1.59058	1.84436	2.00885	2.16333
	381.4	0.0564651	0.16072	0.51389	0.6896	1.17065	1.59022	1.84454	2.00823	2.16315
	381.6	0.0560938	0.15955	0.51346	0.69011	1.16998	1.58991	1.84387	2.00869	2.16325
	381.8	0.0558066	0.15943	0.5134	0.69178	1.17117	1.5902	1.8436	2.00845	2.16379
	382	0.0553596	0.15932	0.51318	0.69107	1.17108	1.59037	1.84366	2.00802	2.1634
	382.2	0.0552962	0.15885	0.51286	0.69203	1.17161	1.58981	1.84274	2.00798	2.1638
	382.4	0.0539517	0.1587	0.51382	0.69145	1.17094	1.58982	1.84311	2.00839	2.16359
	382.6	0.053678	0.15949	0.51303	0.69126	1.17183	1.58999	1.84371	2.00773	2.16377
	382.8	0.0551129	0.16025	0.51238	0.69029	1.17048	1.58906	1.84404	2.00711	2.16324
	383	0.0553959	0.16028	0.51318	0.69102	1.17027	1.58886	1.84349	2.00769	2.16239
	383.2	0.0554908	0.15947	0.51265	0.68905	1.17082	1.58919	1.84373	2.00683	2.1607
	383.4	0.0566535	0.15953	0.51241	0.68923	1.17042	1.58875	1.84266	2.00724	2.16098
	383.6	0.0572047	0.15899	0.51379	0.68852	1.16976	1.58826	1.84256	2.00761	2.16018
	383.8	0.0565542	0.15827	0.51389	0.68846	1.16954	1.58766	1.84232	2.00734	2.16063
	384	0.0564982	0.15812	0.51363	0.68784	1.16812	1.58712	1.8434	2.00629	2.16101
	384.2	0.0569557	0.15936	0.51365	0.68892	1.16769	1.58684	1.84372	2.00634	2.162
	384.4	0.0562214	0.15914	0.51478	0.68862	1.16924	1.58711	1.84369	2.00528	2.16136
	384.6	0.0554348	0.15921	0.51399	0.68889	1.16856	1.58689	1.84394	2.00503	2.1619
	384.8	0.0551368	0.15879	0.5148	0.68859	1.16912	1.58667	1.8431	2.00477	2.16144
	385	0.0551041	0.15946	0.51474	0.68849	1.1703	1.58649	1.8416	2.00476	2.16164
	385.2	0.0546137	0.15902	0.51473	0.68871	1.17063	1.58654	1.84143	2.00442	2.16003
	385.4	0.0549218	0.15976	0.51362	0.68869	1.16965	1.58552	1.84191	2.0045	2.15968
	385.6	0.0569005	0.15932	0.51386	0.68852	1.16993	1.58619	1.84157	2.00422	2.15985
	385.8	0.0572978	0.15914	0.51333	0.68934	1.16951	1.58797	1.84224	2.00391	2.15964
	386	0.0582693	0.15904	0.51403	0.68982	1.1684	1.58828	1.84296	2.00399	2.15851
	386.2	0.058195	0.15979	0.51385	0.69011	1.16794	1.58732	1.84301	2.00361	2.15863
	386.4	0.0582984	0.15897	0.51328	0.69041	1.16804	1.5881	1.84235	2.00356	2.15911
	386.6	0.0562142	0.15965	0.51218	0.691	1.1691	1.58789	1.84236	2.00339	2.15861
	386.8	0.0564504	0.16066	0.51259	0.69028	1.16819	1.58756	1.84147	2.00329	2.15892
	387	0.0562687	0.16025	0.51175	0.68921	1.16898	1.58851	1.84152	2.00396	2.1596
	387.2	0.0563528	0.1601	0.51174	0.68795	1.16796	1.58834	1.84173	2.00414	2.15867
	387.4	0.0557339	0.16018	0.51207	0.68832	1.16763	1.58777	1.84113	2.00356	2.15856
	387.6	0.0565825	0.16002	0.51394	0.68745	1.16629	1.58709	1.84068	2.00325	2.15898
	387.8	0.0567396	0.16032	0.51361	0.68742	1.1663	1.58644	1.84021	2.00272	2.15874
	388	0.0562186	0.16	0.51412	0.68803	1.16585	1.58494	1.83914	2.00202	2.15873
	388.2	0.0568207	0.15971	0.51518	0.68826	1.16602	1.58559	1.83797	2.00219	2.15809
	388.4	0.0573582	0.16001	0.51464	0.68784	1.16552	1.58498	1.83843	2.00178	2.1587
	388.6	0.0569642	0.16008	0.51452	0.68817	1.16573	1.58483	1.83835	2.00196	2.15778
	388.8	0.0565241	0.15989	0.51416	0.68834	1.16679	1.58619	1.83921	2.0023	2.1563
	389	0.0565934	0.15981	0.51343	0.68815	1.16678	1.58559	1.84067	2.00146	2.15608
	389.2	0.0570649	0.15974	0.51275	0.68814	1.16687	1.58511	1.84019	2.00135	2.1578
	389.4	0.0562694	0.1601	0.51298	0.68711	1.16656	1.58602	1.84059	2.00166	2.15667
	389.6	0.0562207	0.16028	0.51307	0.68696	1.16719	1.58562	1.83979	2.00085	2.15701
	389.8	0.0562954	0.16012	0.51346	0.68688	1.16538	1.58411	1.84035	1.99977	2.15802
	390	0.0556499	0.16004	0.51371	0.68718	1.16566	1.5847	1.83958	1.99976	2.15808
	390.2	0.0545016	0.16013	0.5144	0.68666	1.16473	1.585	1.84049	1.99887	2.15781
	390.4	0.05476	0.15913	0.51384	0.68737	1.16542	1.5846	1.83939	1.99872	2.15794
	390.6	0.0551558	0.15938	0.51289	0.68705	1.16474	1.58531	1.84047	1.99968	2.15759
	390.8	0.0549962	0.15896	0.51369	0.68732	1.16729	1.58572	1.84003	1.9992	2.15715
	391	0.0558871	0.15964	0.51411	0.68631	1.16687	1.58563	1.83916	1.99945	2.15703
	391.2	0.0559974	0.15888	0.51329	0.68728	1.16718	1.58469	1.83901	1.99977	2.15646
	391.4	0.0562102	0.15938	0.51439	0.68694	1.16756	1.58495	1.83944	1.99946	2.15571
	391.6	0.0566162	0.15865	0.51503	0.68689	1.16682	1.58443	1.83891	1.99801	2.15451
	391.8	0.0565636	0.15887	0.51381	0.68606	1.16509	1.58439	1.83748	1.99971	2.15533
	392	0.0564393	0.15892	0.5133	0.687	1.16496	1.58444	1.83785	1.99927	2.15437
	392.2	0.0571834	0.15958	0.5137	0.6862	1.16402	1.58507	1.83699	1.99855	2.15467
	392.4	0.0574567	0.15993	0.51318	0.6868	1.16358	1.58468	1.83668	1.99903	2.15441
	392.6	0.057043	0.16	0.51299	0.68688	1.16487	1.58529	1.83618	1.99919	2.1543
	392.8	0.0568709	0.15999	0.51382	0.68669	1.16534	1.58513	1.83637	1.99734	2.1527
	393	0.0565312	0.15944	0.51344	0.68611	1.16448	1.58414	1.83599	1.997	2.15366
	393.2	0.0555642	0.15933	0.51284	0.68573	1.16652	1.58318	1.83588	1.99744	2.15313
	393.4	0.0559064	0.15866	0.51302	0.68518	1.16576	1.58298	1.83533	1.99594	2.15341
	393.6	0.0559545	0.15943	0.51247	0.68618	1.16502	1.58319	1.8344	1.99665	2.15387
	393.8	0.0567227	0.15943	0.51258	0.68633	1.165	1.58298	1.83544	1.99741	2.15368
	394	0.0567962	0.16069	0.51328	0.68592	1.16559	1.58295	1.83463	1.99708	2.15328
	394.2	0.0580129	0.16072	0.5132	0.68711	1.16458	1.58357	1.83449	1.99695	2.15309
	394.4	0.0576901	0.1616	0.51335	0.68692	1.16512	1.58391	1.83439	1.9973	2.15297
	394.6	0.0578879	0.16054	0.51368	0.68662	1.16408	1.58353	1.83555	1.99673	2.15294
	394.8	0.0576652	0.16008	0.51369	0.68635	1.16465	1.58309	1.83479	1.99625	2.15332
	395	0.0579643	0.15981	0.51391	0.68691	1.16485	1.58398	1.83571	1.99625	2.15344
	395.2	0.058135	0.15967	0.51382	0.68572	1.165	1.58352	1.8355	1.99504	2.15314
	395.4	0.0577204	0.15911	0.51303	0.68514	1.16514	1.58328	1.83583	1.99462	2.15291
	395.6	0.0574266	0.16009	0.51237	0.68441	1.16572	1.58284	1.83521	1.99497	2.15362
	395.8	0.056758	0.16055	0.51155	0.68558	1.1647	1.58246	1.83544	1.99575	2.15371
	396	0.0571559	0.16028	0.51044	0.68552	1.16504	1.58291	1.83626	1.99539	2.15333
	396.2	0.0567403	0.1603	0.51138	0.68702	1.16502	1.58374	1.83614	1.99568	2.15217
	396.4	0.0562447	0.16048	0.51206	0.68769	1.16479	1.58328	1.83569	1.9964	2.15172
	396.6	0.0564564	0.16031	0.51281	0.68838	1.16532	1.58299	1.83574	1.99583	2.15055
	396.8	0.0571347	0.15959	0.51226	0.68721	1.1656	1.58365	1.83562	1.99551	2.1503
	397	0.0563193	0.16003	0.51313	0.68762	1.16494	1.58303	1.83491	1.99601	2.14911
	397.2	0.0560459	0.15972	0.51181	0.68702	1.16464	1.58118	1.83506	1.99489	2.14976
	397.4	0.0567157	0.15864	0.51139	0.68603	1.16531	1.58088	1.83552	1.99492	2.14991
	397.6	0.0565559	0.15861	0.51179	0.68507	1.16503	1.58179	1.83488	1.99394	2.14921
	397.8	0.0565516	0.16014	0.51335	0.68579	1.16549	1.58077	1.83612	1.99367	2.14878
	398	0.0569094	0.1598	0.51387	0.68517	1.16566	1.58028	1.83585	1.99327	2.14864
	398.2	0.0565172	0.16005	0.51437	0.68504	1.16567	1.58089	1.83561	1.99481	2.14885
	398.4	0.0565054	0.16094	0.51566	0.68618	1.16569	1.58068	1.83598	1.99533	2.14796
	398.6	0.0570258	0.16099	0.51523	0.68674	1.16558	1.57971	1.83634	1.99609	2.14844
	398.8	0.0572946	0.15982	0.51376	0.68599	1.16589	1.57978	1.8344	1.99587	2.14909
	399	0.0571762	0.16015	0.5134	0.68525	1.16568	1.57958	1.83475	1.99601	2.1491
	399.2	0.0575305	0.16047	0.51395	0.68482	1.16598	1.57957	1.83396	1.99415	2.14906
	399.4	0.0570272	0.16054	0.51301	0.68398	1.16505	1.57943	1.83335	1.99331	2.14873
	399.6	0.0562659	0.16044	0.51274	0.68319	1.16459	1.57901	1.83322	1.99291	2.14875
[truncated: 201 more rows]

## Sheet: Fig. 10D
	Raw sinuosity data													Statistics for individual replicates
	Sinuosity													Condition	Replicate	n	Mean	SD	SEM	95%CI_low	95%CI_high	Median	p (Shapiro-Wilk)
	WT			ΔbacA			ΔlmdC			ΔbacA ΔlmdC				ΔbacA ΔlmdC	1	100	1.08331	0.03218	0.00323	1.07689	1.08973	1.07972	0.004
	Replicate 1	Replicate 2	Replicate 3	Replicate 1	Replicate 2	Replicate 3	Replicate 1	Replicate 2	Replicate 3	Replicate 1	Replicate 2	Replicate 3		ΔbacA ΔlmdC	2	100	1.07687	0.03459	0.00348	1.06997	1.08376	1.0696	0.006
	1.02502	1.04641	1.01665	1.07316	1.09245	1.08018	1.03695	1.03889	1.0797	1.05972	1.05584	1.06232		ΔbacA ΔlmdC	3	100	1.07486	0.03409	0.00343	1.06806	1.08166	1.06861	0
	1.04158	1.07163	1.0656	1.12188	1.07073	1.08295	1.07062	1.12015	1.09802	1.0705	1.04623	1.08614		ΔlmdC	1	100	1.07836	0.03118	0.00313	1.07214	1.08458	1.07626	0.005
	1.04874	1.07036	1.04624	1.08688	1.04651	1.06198	1.08964	1.12136	1.05695	1.03094	1.07579	1.08264		ΔlmdC	2	100	1.07898	0.03228	0.00324	1.07254	1.08542	1.0732	0
	1.05445	1.03369	1.03725	1.06185	1.08019	1.08705	1.0509	1.07055	1.04612	1.11321	1.06729	1.0592		ΔlmdC	3	100	1.07216	0.03052	0.00307	1.06608	1.07825	1.06748	0.008
	1.05654	1.02972	1.03266	1.08184	1.13844	1.07009	1.09356	1.10359	1.07843	1.13528	1.03551	1.09495		ΔbacA	1	100	1.08323	0.02855	0.00287	1.07754	1.08892	1.08026	0.082
	1.03075	1.07925	1.04548	1.09748	1.06395	1.04108	1.06628	1.12797	1.10737	1.0529	1.03292	1.09676		ΔbacA	2	100	1.08808	0.03514	0.00353	1.08108	1.09509	1.08829	0.095
	1.03723	1.02409	1.04415	1.09785	1.0891	1.06755	1.05043	1.06955	1.04584	1.04561	1.11616	1.16765		ΔbacA	3	100	1.08527	0.03306	0.00332	1.07868	1.09186	1.08019	0.012
	1.01918	1.04586	1.08577	1.09246	1.08974	1.08836	1.05288	1.04626	1.02834	1.12182	1.06519	1.1872		WT	1	100	1.04274	0.01721	0.00173	1.03931	1.04617	1.04171	0.012
	1.04964	1.0354	1.05857	1.0611	1.10402	1.05949	1.08819	1.03743	1.08472	1.03595	1.02229	1.09133		WT	2	100	1.04103	0.01594	0.0016	1.03785	1.04421	1.0386	0.042
	1.05896	1.02914	1.03157	1.06606	1.14815	1.07665	1.0901	1.09545	1.03152	1.05925	1.09438	1.14481		WT	3	100	1.04222	0.01669	0.00168	1.03889	1.04555	1.04109	0.129
	1.05532	1.03341	1.02975	1.11977	1.08934	1.06843	1.07007	1.05275	1.05923	1.11486	1.04826	1.06852
	1.05029	1.02115	1.01959	1.0216	1.09945	1.11453	1.04811	1.076	1.0548	1.06983	1.13971	1.15031
	1.01477	1.06029	1.04517	1.03844	1.08916	1.14134	1.09205	1.07162	1.049	1.04814	1.10072	1.08011		Statistics for conditions
	1.0542	1.01178	1.05197	1.0692	1.06493	1.08203	1.09339	1.09943	1.06779	1.07646	1.09216	1.04112		Condition	n	Mean	SD	SEM	95%CI_low	95%CI_high
	1.03942	1.04013	1.00711	1.08276	1.11116	1.06893	1.05063	1.0559	1.10571	1.0525	1.09784	1.10861		ΔbacA ΔlmdC	3	1.07834	0.00442	0.00312	1.06491	1.09178
	1.02646	1.02551	1.0566	1.08025	1.0836	1.03439	1.08963	1.06747	1.06821	1.07608	1.08182	1.11212		ΔlmdC	3	1.0765	0.00377	0.00267	1.06503	1.08797
	1.06081	1.0308	1.04624	1.12613	1.06633	1.04553	1.1097	1.07958	1.09961	1.10282	1.04231	1.04805		ΔbacA	3	1.08553	0.00244	0.00172	1.07811	1.09294
	1.0392	1.04182	1.04261	1.05495	1.05686	1.07762	1.06482	1.09919	1.06065	1.1092	1.02584	1.08412		WT	3	1.042	0.00087	0.00062	1.03934	1.04466
	1.03504	1.03326	1.02517	1.07325	1.03614	1.10747	1.04883	1.03477	1.07215	1.12716	1.03708	1.14008
	1.03562	1.04849	1.0481	1.08219	1.07459	1.08893	1.03	1.07997	1.07383	1.06258	1.09163	1.03665
	1.00671	1.01908	1.02371	1.09314	1.1012	1.08019	1.06006	1.06032	1.1206	1.07588	1.14908	1.03133		Relevant statistics for comparison of means between conditions
	1.05045	1.0346	1.05757	1.11332	1.09569	1.02355	1.09599	1.0702	1.05829	1.10527	1.12663	1.0162		Condition	Difference	95%CI_low	95%CI_high	p value
	1.05381	1.04819	1.00894	1.10815	1.06061	1.13442	1.08434	1.07121	1.07589	1.11716	1.1003	1.09326		WT vs ΔbacA ΔlmdC	0.03635	0.02591	0.04679	0.00372837
	1.03413	1.01992	1.02048	1.06772	1.05884	1.0834	1.07418	1.07183	1.11989	1.07094	1.07491	1.055		WT vs ΔlmdC	0.0345	0.02573	0.04328	0.00267927
	1.03223	1.02897	1.03864	1.10845	1.06518	1.08517	1.05021	1.0613	1.07763	1.11003	1.06585	1.03931		WT vs ΔbacA	0.04353	0.0382	0.04887	0.00030893
	1.04337	1.04262	1.03597	1.06494	1.09912	1.08302	1.09065	1.07322	1.07576	1.13894	1.04878	1.07737		ΔbacA vs ΔbacA ΔlmdC	-0.00718	-0.01626	0.00189	0.0871792
	1.03399	1.03071	1.02919	1.07412	1.03562	1.06802	1.10934	1.03617	1.03385	1.05378	1.06417	1.08279		ΔbacA vs ΔlmdC	-0.00903	-0.01673	-0.00133	0.0324343
	1.0516	1.03926	1.02766	1.14015	1.10372	1.05602	1.05757	1.04722	1.08188	1.09135	1.04493	1.04983		ΔbacA vs WT	-0.04353	-0.04887	-0.0382	0.00030893
	1.06488	1.03676	1.02835	1.10614	1.04751	1.14101	1.13678	1.03337	1.04521	1.04619	1.05983	1.08083
	1.03794	1.03488	1.06784	1.05306	1.01767	1.19413	1.10684	1.13633	1.09575	1.11487	1.0388	1.0768
	1.03777	1.06998	1.04618	1.0489	1.06071	1.05328	1.03066	1.08128	1.09669	1.06985	1.1089	1.05008
	1.01559	1.03367	1.02716	1.08714	1.07162	1.05248	1.09669	1.09563	1.05736	1.07978	1.15406	1.08551
	1.03494	1.02521	1.02415	1.05783	1.17087	1.08772	1.06921	1.05492	1.069	1.06197	1.08491	1.1169
	1.05221	1.03613	1.01993	1.08028	1.03493	1.07899	1.12765	1.06555	1.05781	1.09887	1.10994	1.05282
	1.04453	1.04837	1.05209	1.07695	1.03807	1.08402	1.09383	1.06281	1.05467	1.08973	1.08577	1.12003
	1.03593	1.02369	1.0276	1.07226	1.04616	1.0842	1.11833	1.08804	1.07091	1.06715	1.05679	1.06869
	1.05285	1.03719	1.02101	1.09464	1.1233	1.05719	1.09938	1.05794	1.09583	1.11197	1.11461	1.12865
	1.03055	1.04039	1.0531	1.08112	1.07534	1.08636	1.10719	1.12043	1.04437	1.1442	1.10963	1.05844
	1.02404	1.0462	1.0412	1.06234	1.05988	1.1318	1.10594	1.12279	1.16795	1.03555	1.08155	1.05927
	1.03654	1.07555	1.03677	1.07705	1.05613	1.09087	1.03349	1.05466	1.10115	1.04544	1.03799	1.1107
	1.07472	1.07366	1.02938	1.08015	1.06513	1.06112	1.03747	1.06372	1.10158	1.07474	1.08378	1.03806
	1.05567	1.04326	1.03127	1.0705	1.10115	1.04794	1.06987	1.10538	1.04277	1.09632	1.06936	1.12986
	1.04184	1.0282	1.0386	1.07663	1.12491	1.07701	1.05673	1.01344	1.10089	1.04554	1.14808	1.10004
	1.07418	1.04886	1.06652	1.11165	1.07156	1.14179	1.10357	1.15611	1.04027	1.07665	1.05142	1.06794
	1.03862	1.0436	1.05592	1.09638	1.09314	1.1573	1.08366	1.05462	1.08449	1.06024	1.06564	1.05492
	1.03031	1.04825	1.04764	1.08583	1.14625	1.1101	1.08781	1.07318	1.14398	1.09902	1.05803	1.0543
	1.05689	1.03628	1.04562	1.04864	1.09099	1.12053	1.06621	1.02593	1.07352	1.06508	1.06797	1.06813
	1.0684	1.01855	1.05533	1.04725	1.06037	1.1245	1.04504	1.10741	1.08697	1.10184	1.10172	1.06332
	1.03163	1.03307	1.06021	1.04259	1.11781	1.07707	1.10246	1.18116	1.05036	1.05181	1.13621	1.04123
	1.04665	1.01609	1.03577	1.05421	1.11609	1.09588	1.12568	1.06368	1.03975	1.08387	1.06955	1.06248
	1.01141	1.01854	1.02774	1.09273	1.04896	1.05109	1.07775	1.04686	1.05668	1.06821	1.06386	1.07188
	1.06263	1.04859	1.04333	1.078	1.05436	1.05583	1.03381	1.06542	1.05875	1.10346	1.08271	1.09352
	1.04812	1.04801	1.05133	1.09184	1.08464	1.09877	1.08854	1.08269	1.09578	1.03954	1.06798	1.04652
	1.08207	1.03833	1.04824	1.10911	1.07624	1.05322	1.10536	1.08602	1.08957	1.12387	1.12342	1.05302
	1.04538	1.03973	1.09255	1.10654	1.14584	1.0786	1.09817	1.07219	1.03813	1.05728	1.11689	1.08661
	1.04288	1.06124	1.05396	1.0928	1.0648	1.11711	1.04954	1.07992	1.03293	1.11613	1.08426	1.08778
	1.06568	1.05111	1.05998	1.10709	1.06371	1.02426	1.0537	1.07159	1.04776	1.07589	1.06627	1.06593
	1.03369	1.02071	1.04296	1.06482	1.061	1.05378	1.05542	1.06692	1.06042	1.08006	1.09378	1.05243
	1.04998	1.0595	1.03369	1.13094	1.11163	1.11128	1.11974	1.03419	1.11963	1.05081	1.06031	1.02267
	1.02757	1.04799	1.03396	1.06376	1.19902	1.05536	1.09118	1.08606	1.10207	1.04478	1.0347	1.02852
	1.0218	1.05114	1.06593	1.15711	1.12031	1.07386	1.08172	1.14428	1.06839	1.06041	1.14342	1.08712
	1.08487	1.02791	1.05922	1.08385	1.09608	1.17569	1.11557	1.10357	1.05991	1.19652	1.15592	1.03233
	1.01683	1.03862	1.02822	1.12401	1.06336	1.11269	1.06719	1.05527	1.11285	1.11353	1.04879	1.02382
	1.03293	1.06652	1.04583	1.05696	1.06739	1.08304	1.06444	1.13518	1.12855	1.11793	1.05398	1.12413
	1.04154	1.03808	1.05251	1.07983	1.15684	1.12413	1.04561	1.0992	1.06057	1.04604	1.09312	1.02673
	1.05735	1.0501	1.01385	1.09536	1.09088	1.10098	1.13521	1.07684	1.09038	1.10791	1.05977	1.09241
	1.048	1.0582	1.05314	1.11686	1.10501	1.11218	1.07384	1.10013	1.05631	1.15181	1.08466	1.05513
	1.04819	1.03708	1.02887	1.09159	1.05544	1.07955	1.08647	1.05995	1.03218	1.07521	1.04326	1.08817
	1.04064	1.07089	1.03474	1.06643	1.02774	1.06265	1.09827	1.16628	1.10098	1.04963	1.07768	1.04171
	1.04574	1.06231	1.03649	1.05952	1.11684	1.14337	1.13105	1.06555	1.03351	1.03553	1.07005	1.07723
	1.04407	1.03814	1.02126	1.09395	1.07839	1.06741	1.03898	1.03524	1.07616	1.08447	1.06975	1.0689
	1.00674	1.01744	1.03996	1.07527	1.06656	1.09759	1.08304	1.07837	1.04219	1.0958	1.08425	1.10797
	1.02745	1.04637	1.04499	1.06466	1.09438	1.07959	1.1207	1.12423	1.07522	1.08354	1.06912	1.05118
	1.07019	1.02826	1.03992	1.12513	1.1301	1.1114	1.06944	1.07931	1.04401	1.06302	1.08188	1.0581
	1.01704	1.06686	1.03761	1.08597	1.10941	1.10051	1.07477	1.09398	1.09644	1.09418	1.1451	1.06472
	1.04873	1.03091	1.03992	1.07962	1.05606	1.04437	1.0453	1.08729	1.13662	1.10822	1.03597	1.11236
	1.04443	1.02417	1.01158	1.04698	1.12257	1.07672	1.0877	1.15691	1.10405	1.12769	1.04198	1.05303
	1.02534	1.06708	1.08045	1.14344	1.12058	1.09603	1.14372	1.08328	1.12158	1.08919	1.11188	1.04108
	1.02592	1.02824	1.04654	1.06432	1.10409	1.06142	1.06288	1.05916	1.05244	1.08589	1.13063	1.10368
	1.0424	1.01965	1.05978	1.18613	1.02193	1.05375	1.11142	1.11493	1.01787	1.17215	1.05174	1.09994
	1.02796	1.02045	1.07618	1.07494	1.0919	1.07526	1.03093	1.04832	1.01855	1.10732	1.12358	1.10675
	1.03266	1.04531	1.04969	1.04623	1.06469	1.07659	1.06227	1.05881	1.03532	1.09643	1.06684	1.0854
	1.05498	1.04831	1.04515	1.02763	1.08773	1.08756	1.13946	1.06966	1.06717	1.08888	1.03346	1.0716
	1.07208	1.04443	1.03416	1.11892	1.08885	1.06101	1.0522	1.08022	1.09666	1.04808	1.04598	1.06256
	1.1127	1.02429	1.05716	1.08559	1.13998	1.07548	1.03351	1.15325	1.04966	1.10128	1.05958	1.04941
	1.04192	1.04415	1.0742	1.09955	1.10975	1.14964	1.08794	1.06762	1.06223	1.05253	1.05775	1.08491
	1.04328	1.05591	1.02726	1.06275	1.14612	1.09608	1.08157	1.07728	1.0924	1.06802	1.02991	1.04283
	1.05264	1.06098	1.04012	1.07403	1.05011	1.07635	1.04768	1.06464	1.13323	1.03383	1.04347	1.06875
	1.02329	1.06554	1.02966	1.11369	1.17163	1.12389	1.05889	1.05754	1.06509	1.08276	1.04676	1.04801
	1.04	1.05068	1.04018	1.0573	1.04381	1.05142	1.06142	1.07328	1.05555	1.06944	1.14858	1.04876
	1.02608	1.05717	1.03678	1.04695	1.0988	1.08732	1.06081	1.07365	1.04496	1.04838	1.09517	1.18057
	1.03703	1.01767	1.04796	1.08296	1.10786	1.13931	1.06899	1.08027	1.03991	1.0903	1.10156	1.0287
	1.04624	1.03388	1.04261	1.04769	1.12689	1.09638	1.20108	1.07683	1.05501	1.07966	1.10426	1.04111
	1.0391	1.03825	1.04807	1.07638	1.06854	1.12511	1.03019	1.03874	1.04144	1.08594	1.03217	1.09262
	1.05642	1.04612	1.04544	1.12616	1.06932	1.0631	1.02617	1.06992	1.06516	1.10998	1.1019	1.06333
	1.02645	1.02554	1.04097	1.10865	1.11164	1.02439	1.04878	1.02662	1.0747	1.04383	1.02047	1.04787
	1.04065	1.03858	1.03099	1.03353	1.07805	1.0747	1.05517	1.05579	1.02786	1.05563	1.03164	1.05454
	1.04959	1.01101	1.01762	1.04622	1.07285	1.03371	1.08541	1.07361	1.06422	1.06223	1.01489	1.08031
	1.0333	1.06386	1.03783	1.10435	1.1381	1.03287	1.08154	1.09196	1.13735	1.10429	1.06964	1.05919
	1.03158	1.0361	1.08138	1.08413	1.12313	1.10701	1.09764	1.09144	1.04482	1.13458	1.0738	1.07316

## Sheet: Fig. 1 - FigSuppl. 2D
	Condition /Replicate	t1 [h]	ODt1	t2 [h]	ODt2	Growth rate (µ) [h-1]	Doubling time (td) [h]	Mean td [h]	SD td [h]
	WT 1	1	0.02	5	0.068	0.305944	2.2656
	WT 2	1	0.019	5	0.068	0.318767	2.17446	2.21775	0.0373479
	WT 3	1	0.018	5	0.063	0.313191	2.21318
	plus BacA 1	1	0.022	5	0.0976667	0.372629	1.86015
	plus BacA 2	1	0.021	5	0.0876667	0.357255	1.9402	1.99211	0.134061
	plus BacA 3	1	0.022	5	0.0786667	0.318544	2.17598
	minus BacA 1	1	0.023	5	0.113	0.397973	1.74169
	minus BacA 2	1	0.022	5	0.094	0.363063	1.90916	1.99885	0.254604
	minus BacA 3	1	0.023	5	0.075	0.295498	2.34569

## Sheet: Fig. 9 - FigSuppl. 1C
	Condition /Replicate	t1 [h]	ODt1	t2 [h]	ODt2	Growth rate µ [h-1]	Doubling time td [h]	Mean td [h]	SD td [h]
	sgLmdC +Cu1	1	0.02	5	0.0806667	0.348648	1.9881
	sgLmdC +Cu2	1	0.036	5	0.0956667	0.244338	2.83684	2.42028	0.346673
	sgLmdC +Cu3	1	0.022	5	0.0686667	0.284555	2.4359
	sgLmdC -Cu1	1	0.022	5	0.06	0.250826	2.76346
	sgLmdC -Cu2	1	0.023	5	0.061	0.243845	2.84257	2.75112	0.0801885
	sgLmdC -Cu3	1	0.02	5	0.057	0.26183	2.64732
	empty vector +Cu1	1	0.021	5	0.0576667	0.252539	2.74471
	empty vector +Cu2	1	0.022	5	0.0586667	0.245207	2.82678	2.85377	0.101873
	empty vector +Cu3	1	0.024	5	0.0606667	0.231835	2.98983
	empty vector -Cu1	1	0.023	5	0.091	0.343841	2.01589
	empty vector -Cu2	1	0.022	5	0.083	0.33195	2.08811	2.20924	0.224316
	empty vector -Cu3	1	0.025	5	0.075	0.274653	2.52372

## Sheet: Fig. 10 - FigSuppl. 2
	Raw sinuosity data										Statistics for individual replicates
	Sinuosity										Condition	Replicate	n	Mean	SD	SEM	95%CI_low	95%CI_high	Median	p (Shapiro-Wilk)
	WT			ΔbacA + bacA			bacA::bacA-mCherry				ΔbacA + bacA	1	100	1.07055	0.02227	0.00224	1.0661	1.07499	1.07093	0.472
	Replicate 1	Replicate 2	Replicate 3	Replicate 1	Replicate 2	Replicate 3	Replicate 1	Replicate 2	Replicate 3		ΔbacA + bacA	2	100	1.06683	0.02242	0.00225	1.06236	1.0713	1.06479	0.297
	1.02126	1.02682	1.03453	1.09013	1.08106	1.05099	1.04566	1.04925	1.05115		ΔbacA + bacA	3	100	1.06486	0.01943	0.00195	1.06098	1.06873	1.06546	0
	1.03485	1.03974	1.05367	1.08718	1.05378	1.05464	1.04424	1.01873	1.05374		bacA::bacA-mCherry	1	100	1.03356	0.01361	0.00137	1.03084	1.03627	1.03373	0.378
	1.06053	1.04923	1.03502	1.02936	1.10997	1.07498	1.03732	1.03976	1.02474		bacA::bacA-mCherry	2	100	1.03547	0.01632	0.00164	1.03221	1.03872	1.03315	0.016
	1.00753	1.01256	1.02376	1.07089	1.06671	1.06505	1.02845	1.00926	1.04929		bacA::bacA-mCherry	3	100	1.04042	0.01602	0.00161	1.03722	1.04361	1.04182	0.045
	1.02302	1.04445	1.08729	1.08191	1.08492	1.06773	1.04089	1.05187	1.01114		WT	1	100	1.03705	0.0178	0.00179	1.0335	1.0406	1.03388	0.003
	1.04131	1.08171	1.04143	1.0872	1.04354	1.04226	1.06685	1.02835	1.04236		WT	2	100	1.04263	0.01606	0.00161	1.03943	1.04583	1.0405	0.236
	1.05444	1.03217	1.05292	1.0724	1.08134	1.06323	1.00976	1.03728	1.02233		WT	3	100	1.03826	0.01864	0.00187	1.03454	1.04198	1.03556	0.007
	1.05872	1.03291	1.02261	1.05531	1.09986	1.03452	1.02455	1.02974	1.02168
	1.03803	1.03537	1.04213	1.09273	1.0789	1.06688	1.04435	1.03138	1.07118
	1.01777	1.05568	1.01674	1.0744	1.07853	1.06487	1.02619	1.03051	1.02311		Statistics for conditions
	1.02724	1.03632	1.03831	1.07486	1.05595	1.07347	1.03603	1.06018	1.04619		Condition	n	Mean	SD	SEM	95%CI_low	95%CI_high
	1.03003	1.03771	1.03024	1.06966	1.06493	1.06416	1.03424	1.05033	1.04757		ΔbacA + bacA	3	1.06741	0.00289	0.00204	1.05863	1.0762
	1.04151	1.07026	1.04641	1.1092	1.06375	1.04014	1.0259	1.04304	1.06756		bacA::bacA-mCherry	3	1.03648	0.00354	0.0025	1.02571	1.04725
	1.06367	1.03015	1.05254	1.04658	1.13679	1.09163	1.03438	1.05334	1.06474		WT	3	1.03931	0.00294	0.00208	1.03038	1.04825
	1.03869	1.07116	1.04954	1.07212	1.02883	1.04345	1.01847	1.01993	1.04734
	1.03366	1.0339	1.02393	1.08895	1.05971	1.06849	1.04367	1.06257	1.01147
	1.05547	1.06022	1.07861	1.05164	1.0532	1.05481	1.03519	1.03746	1.029		Relevant statistics for comparison of means between conditions
	1.01852	1.04161	1.03804	1.05013	1.08894	1.04364	1.04906	1.05195	1.01103		Condition	Difference	95%CI_low	95%CI_high	p value
	1.04017	1.05008	1.05359	1.09156	1.03199	1.05377	1.03749	1.01773	1.02954		WT vs ΔbacA+bacA	0.0281	0.0215	0.0347	0.000294
	1.02085	1.04233	1.00855	1.09533	1.05793	1.08664	1.05306	1.05409	1.02931		WT vs bacA::bacA-mCherry	-0.00283	-0.01031	0.00464	0.348
	1.06572	1.05153	1.03367	1.11898	1.08231	1.06237	1.03054	1.03773	1.03617
	1.02672	1.02249	1.05259	1.07975	1.0803	1.02857	1.06172	1.0333	1.05172
	1.05722	1.05398	1.07035	1.07788	1.07722	1.05216	1.06345	1.02363	1.04372
	1.02115	1.03215	1.03702	1.06364	1.04719	1.0426	1.00618	1.02351	1.03936
	1.03512	1.04148	1.05844	1.0261	1.07087	1.05755	1.05727	1.03007	1.01941
	1.02125	1.06565	1.0376	1.07525	1.05666	1.07038	1.02021	1.04357	1.04084
	1.02056	1.04277	1.04427	1.08487	1.07285	1.06439	1.03878	1.03257	1.05185
	1.03851	1.06139	1.02198	1.08841	1.06095	1.06246	1.0518	1.033	1.03395
	1.03712	1.052	1.00621	1.04173	1.09485	1.06811	1.03519	1.03413	1.04161
	1.03028	1.03728	1.03422	1.07972	1.0576	1.04072	1.03231	1.02675	1.02499
	1.00452	1.04482	1.03471	1.05673	1.07502	1.11573	1.03132	1.02327	1.02243
	1.0481	1.06411	1.02311	1.13022	1.07065	1.04116	1.05707	1.038	1.05906
	1.02889	1.03384	1.07417	1.09639	1.08899	1.05134	1.01183	1.02571	1.03319
	1.02892	1.03709	1.03849	1.08137	1.06524	1.0783	1.02934	1.01762	1.04502
	1.02196	1.01772	1.05169	1.07499	1.08234	1.05121	1.03321	1.024	1.04495
	1.06582	1.04643	1.03008	1.05146	1.06707	1.07741	1.01571	1.02224	1.05761
	1.04084	1.06971	1.01781	1.05712	1.10704	1.06227	1.04099	1.05287	1.06497
	1.05388	1.01992	1.01564	1.10938	1.05685	1.03923	1.02689	1.02764	1.01631
	1.0408	1.04974	1.00891	1.12707	1.07268	1.05712	1.01881	1.03836	1.02435
	1.04049	1.05836	1.02639	1.07894	1.05039	1.09589	1.04359	1.02431	1.04484
	1.06435	1.03645	1.00392	1.04922	1.08455	1.08463	1.02757	1.03867	1.04184
	1.03639	1.01846	1.01362	1.04239	1.08664	1.07744	1.02092	1.05925	1.05724
	1.01241	1.01572	1.04305	1.0593	1.04236	1.06906	1.02505	1.06027	1.02356
	1.04405	1.02785	1.03071	1.0554	1.01407	1.06384	1.04405	1.0415	1.04378
	1.02378	1.00159	1.04406	1.05447	1.09906	1.05945	1.03985	1.0277	1.0247
	1.03589	1.04338	1.05639	1.03684	1.04535	1.09058	1.01205	1.03088	1.03725
	1.0253	1.05169	1.04079	1.03611	1.04738	1.04954	1.04383	1.0472	1.05056
	1.01039	1.08239	1.05533	1.08445	1.05021	1.04974	1.05307	1.04057	1.04516
	1.03545	1.02715	1.04477	1.06998	1.05762	1.07046	1.03542	1.02881	1.05868
	1.04422	1.07009	1.03587	1.04837	1.06571	1.07211	1.04656	1.04004	1.07636
	1.03227	1.04175	1.03427	1.08693	1.03323	1.04531	1.02277	1.03018	1.04071
	1.02999	1.03814	1.05102	1.10553	1.05544	1.07927	1.02144	1.00872	1.04153
	1.08724	1.05352	1.03689	1.06749	1.05582	1.07438	1.0277	1.01231	1.02184
	1.05422	1.04825	1.03331	1.07183	1.03107	1.07031	1.06214	1.03179	1.04551
	1.01134	1.03209	1.04423	1.04817	1.0581	1.04798	1.05503	1.03399	1.0371
	1.02961	1.0333	1.04611	1.03596	1.04692	1.07837	1.01039	1.031	1.04441
	1.02234	1.03043	1.00403	1.03095	1.08502	1.04512	1.01384	1.02709	1.05808
	1.02683	1.03551	1.0094	1.05989	1.06217	1.06586	1.05174	1.0639	1.02877
	1.062	1.03481	1.03228	1.06216	1.06424	1.0495	1.02786	1.01302	1.0433
	1.03249	1.0127	1.0408	1.06051	1.09128	1.07706	1.02244	1.03599	1.02676
	1.01376	1.02455	1.03173	1.06117	1.07364	1.08314	1.03929	1.04048	1.05335
	1.01782	1.08258	1.0189	1.04954	1.04304	1.09459	1.03759	1.02369	1.05232
	1.05505	1.03597	1.03524	1.07488	1.03219	1.03892	1.02908	1.01978	1.05243
	1.02012	1.03521	1.05492	1.06204	1.07056	1.06822	1.01552	1.01172	1.01689
	1.04871	1.02191	1.05312	1.04475	1.04685	1.05078	1.04113	1.08857	1.02775
	1.08459	1.03182	1.03439	1.06786	1.05203	1.07389	1.02341	1.03185	1.02393
	1.04642	1.04459	1.00819	1.03368	1.07492	1.06699	1.01609	1.02653	1.02998
	1.02794	1.07558	1.10314	1.0582	1.07335	1.03406	1.05017	1.0377	1.04123
	1.02919	1.04791	1.02901	1.06734	1.08107	1.05078	1.03539	1.01966	1.05651
	1.03603	1.03523	1.04322	1.0767	1.0806	1.06944	1.04738	1.04303	1.05898
	1.01683	1.05396	1.06919	1.03653	1.05375	1.0736	1.04963	1.04385	1.02037
	1.02574	1.03875	1.07665	1.10617	1.08266	1.03781	1.01529	1.0702	1.04017
	1.06227	1.06275	1.01573	1.04726	1.08095	1.0612	1.02316	1.0479	1.0418
	1.02774	1.02223	1.02234	1.05388	1.06494	1.07131	1.03438	1.03369	1.068
	1.02682	1.03571	1.02476	1.11333	1.0281	1.06997	1.04514	1.05871	1.03017
	1.02387	1.05045	1.03266	1.09422	1.04449	1.06729	1.02515	1.03686	1.02392
	1.04867	1.05895	1.04947	1.09382	1.07841	1.11109	1.02175	1.03984	1.02136
	1.03491	1.04757	1.02504	1.05158	1.0365	1.07037	1.02078	1.01333	1.01976
	1.05295	1.03668	1.04548	1.10616	1.05511	1.07189	1.02541	1.02678	1.03511
	1.02563	1.04355	1.03175	1.07388	1.0652	1.06982	1.0271	1.01348	1.05649
	1.03156	1.04099	1.02468	1.07055	1.03383	1.04073	1.019	1.02692	1.05583
	1.0337	1.05217	1.03983	1.0387	1.07312	1.06937	1.04583	1.03624	1.06007
	1.02475	1.03638	1.05366	1.06716	1.0883	1.08451	1.03015	1.07813	1.06192
	1.06426	1.05079	1.03243	1.05937	1.05896	1.06667	1.03117	1.03367	1.06378
	1.05444	1.02468	1.04559	1.0441	1.0598	1.15831	1.03822	1.00146	1.04231
	1.06579	1.04821	1.03258	1.10238	1.10598	1.06967	1.01793	1.04518	1.04428
	1.05974	1.03377	1.03833	1.07159	1.05654	1.05526	1.04187	1.0059	1.02088
	1.01686	1.02034	1.05438	1.0737	1.09168	1.04703	1.02697	1.04214	1.01811
	1.01238	1.02729	1.03296	1.08293	1.11156	1.09476	1.04119	1.05318	1.04212
	1.04587	1.05663	1.02807	1.07097	1.0602	1.0576	1.04547	1.07753	1.02325
	1.03406	1.04575	1.01646	1.0779	1.06252	1.06076	1.01334	1.0216	1.06507
	1.04954	1.06995	1.07475	1.0851	1.06464	1.06792	1.01715	1.03368	1.05287
	1.09016	1.04	1.0277	1.06333	1.08797	1.08374	1.0264	1.02939	1.06873
	1.01985	1.0311	1.02906	1.08857	1.04519	1.08309	1.03566	1.0261	1.03952
	1.01431	1.03587	1.03316	1.09556	1.11512	1.06882	1.0319	1.05795	1.03123
	1.01959	1.05656	1.05487	1.06695	1.12521	1.05958	1.04786	1.02352	1.01127
	1.05982	1.04492	1.01675	1.08119	1.03499	1.04812	1.01224	1.02999	1.01602
	1.0308	1.0394	1.07695	1.05723	1.04185	1.05882	1.02585	1.06251	1.06346
	1.03359	1.06171	1.02013	1.05324	1.06334	1.09645	1.04406	1.01577	1.04258
	1.04305	1.03853	1.04076	1.07362	1.05025	1.03525	1.03519	1.02616	1.04991
