# Supplementary material for: A dynamic bactofilin cytoskeleton cooperates with an M23 endopeptidase to control bacterial morphogenesis
Source: eLife. 2024 Jan 31;12:RP86577. doi: 10.7554/eLife.86577 (PMC10945521; doi:10.7554/eLife.86577)
Supplement: Supplementary file 2. — The spreadsheet gives the abundance of different muropeptide species in strains S1 (wild-type), SP70 (ΔbacARs), and SP68 (ΔlmdCRs), as obtained in the analysis described in Figure 10—figure supplement 1B. [file elife-86577-supp2.xlsx]

## Sheet: Muropeptide profiles
		R. rubrum		R. rubrum		R. rubrum
		WT		ΔbacA		ΔlmdC
		rep 1	rep 2	rep 1	rep 2	rep 1	rep 2
Peak No.	Muropeptide	% Area	% Area	% Area	% Area	% Area	% Area
1	Tri	1.64	1.6	1.77	1.78	1.68	1.89
2	Tetra	48	47.39	48.8	48.79	48.4	48.88
3	PentaGly5	0.77	0.71	0.65	0.72	0.72	0.74
4	TetraTri	1.57	1.57	1.38	1.31	1.57	1.58
5	TetraPentaGly5	0.58	0.61	0.59	0.43	0.6	0.37
6	TetraTetra	34.11	33.63	34.32	33.67	34.47	34.73
7	TetraAnh	1.61	1.6	1.52	1.52	1.43	1.44
8	TetraTri-LysArg	0	0	0	0	0	0
9	TetraTetraTetra	3.21	3.15	3.14	2.97	2.91	3.09
12	TeraTetraAnh I	2.94	3.2	2.44	2.87	2.76	2.86
13	TeraTetraAnh II	3.75	3.2	3.55	4.89	3.26	3.42
14	TetraTetraTetraAnh	1.29	1.29	1.21	1.04	1.17	1
1 - 16	All known	99.47	97.95	99.37	99.99	98.97	100
	Monomers (total)	52.2972	52.3737	53.0744	52.8153	52.7736	52.95
	Monomer tri	1.64874	1.63349	1.78122	1.78018	1.69748	1.89
	Monomer tetra	48.2558	48.3818	49.1094	48.7949	48.9037	48.88
	Monomer anhydro	1.61858	1.63349	1.52964	1.52015	1.44488	1.44
	Dimers (total)	41.6005	41.4906	41.1593	41.8642	41.5176	41.38
	Dimers tetratri	1.57837	1.60286	1.38875	1.31013	1.58634	1.58
	Dimers tetratetra	41.6005	41.4906	41.1593	41.8642	41.5176	41.38
	Dimers anhydro	6.72565	6.53395	6.02798	7.76078	6.08265	6.28
	Dimer tetratri-LysArg	0	0	0	0	0	0
	Trimers (Total)	4.52398	4.53292	4.37758	4.0104	4.12246	4.09
	Tripeptides (total)	2.43792	2.43492	2.4756	2.43524	2.49065	2.68
	Tetrapeptides (total)	95.7072	95.7274	95.879	95.9746	95.6856	95.605
	Pentapeptides (total)	1.06565	1.03624	0.950991	0.935094	1.03062	0.925
	Chain ends (anhydro)	5.84598	5.77846	5.35541	6.09394	5.27433	5.24667
	Degree of cross-linkage	23.8162	23.7672	23.498	23.6057	23.5071	23.4167
	% peptides in cross-links	47.7028	47.6263	46.9256	47.1847	47.2264	47.05
	0=not detected
