# Supplementary figures and images for: A dynamic bactofilin cytoskeleton cooperates with an M23 endopeptidase to control bacterial morphogenesis
Source: eLife journal article supplement (doi:10.7554/elife.86577), 2023-04-26

Wild type  
 $\Delta bacA$   
 $\Delta bacD$   
 $\Delta bacAD$

kDa

25 -

15 -

anti-BacA

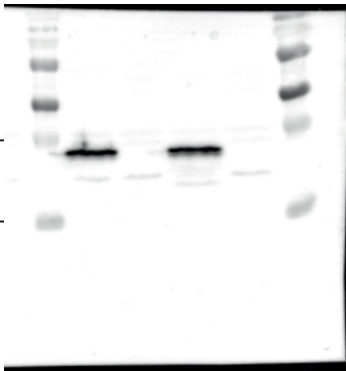

Supplement: fig1-data1 [file Figure 1G-source data 1.pdf › Figure 1G-source data 1.pdf]

Wild type  
 $\Delta$ bacA  
-bacA  
+bacA

kDa

25

15

anti-BacA

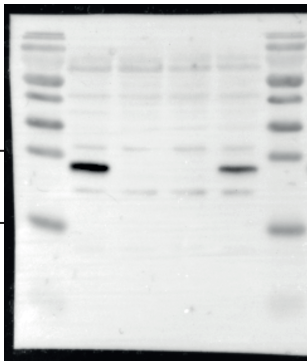

Supplement: fig1-figsupp2-data1 [file Figure 1-figure supplement 2A-source data 1.pdf › Figure 1-figure supplement 2A-source data 1.pdf]

WT    BacA-mNG    LmdC<sup>N</sup>-mNG  
                              SP114    SP118    SP119

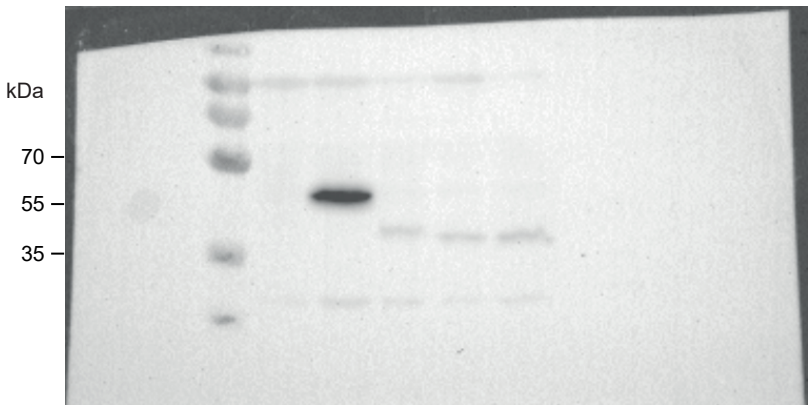

anti-mNeonGreen

Supplement: fig10-figsupp4-data1 [file Figure 10-figure supplement 4B-source data 1.pdf › Figure 10-figure supplement 4B-source data 1.pdf]

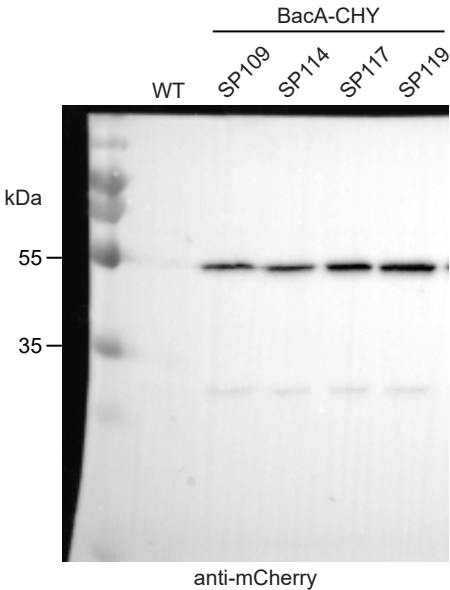

Supplement: fig10-figsupp4-data1 [file Figure 10-figure supplement 4C-source data 1.pdf › Figure 10-figure supplement 4C-source data 1.pdf]

Wild type  
 $\Delta bacA$

Time [h] of BacA depletion

0 1 2 3 4 5 6 7 12 24

kDa

25

15

← BacA

anti-BacA

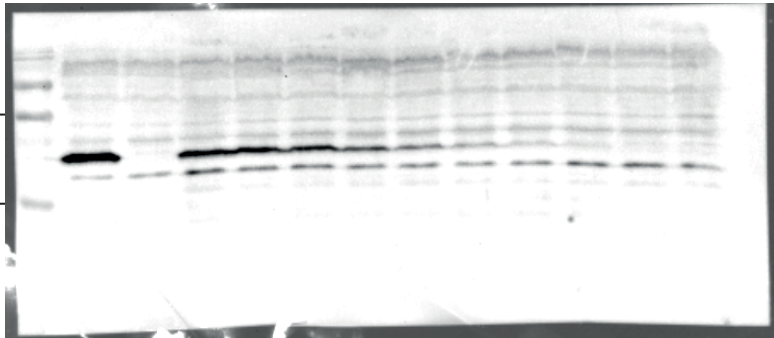

Supplement: fig2-data1 [file Figure 2A-source data 1.pdf › Figure 2A-source data 1.pdf]

Wild type  
BacA-YFP  
BacA<sub>F130R</sub>-YFP

kDa

70

55

35

25

15

10

anti-GFP

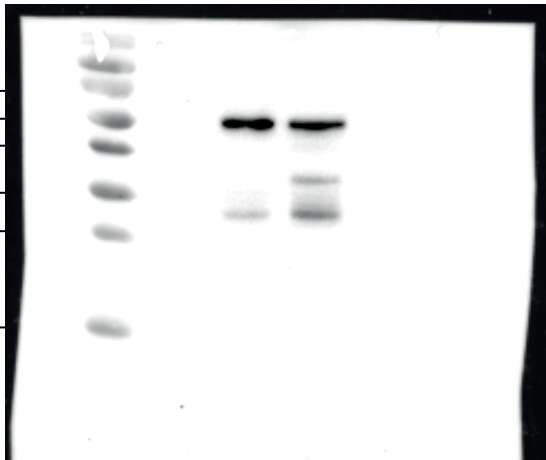

Supplement: fig4-figsupp1-data1 [file Figure 4-figure supplement 1A-source data 1.pdf › Figure 4-figure supplement 1A-source data 1.pdf]

WT

BacD-Venus

kDa

70

55

35

25

15

10

anti-GFP

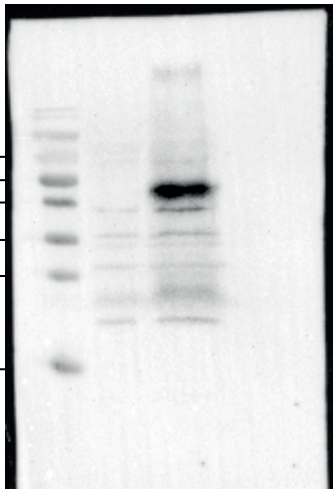

Supplement: fig4-figsupp1-data1 [file Figure 4-figure supplement 1B-source data 1.pdf › Figure 4-figure supplement 1B-source data 1.pdf]

|    |      |              |                    |        |   |              |   |
|----|------|--------------|--------------------|--------|---|--------------|---|
| WT | SU34 | sgLmdC (pre) | Empty vector (pre) | sgLmdC |   | Empty vector |   |
|    |      |              |                    | -      | + | -            | + |

kDa

70

55

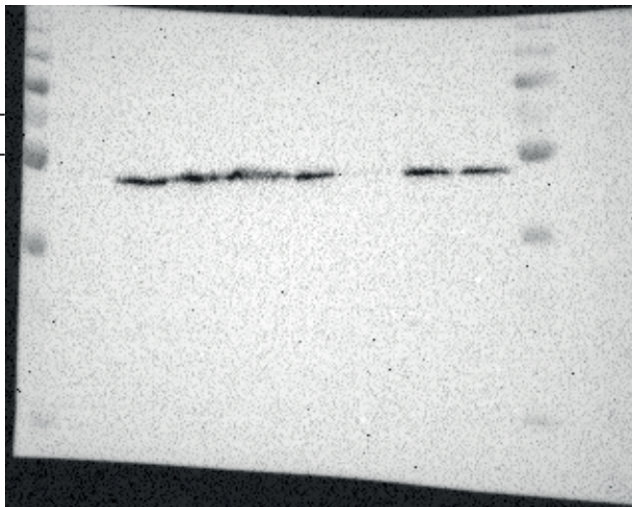

anti-HA

Supplement: fig9-data1 [file Figure 9D-source data 1.pdf › Figure 9D-source data 1.pdf]
